# Supplementary material for: Production of carbon monoxide and hydrogen from methanol using a ruthenium pincer complex: a DFT study
Source: Royal Society of Chemistry journal article supplement (doi:10.1039/d3dt01912h), 2023-01-01
Supplement: d3dt01912h1.pdf [file d3dt01912h1.pdf]

*Supporting Information*

**Production of Carbon Monoxide and Hydrogen from Methanol using a  
Ruthenium Pincer Complex: A DFT Study**

**Lina Geng, Mingchao Zhang, Zhiqiang Zhang, Yan Li\***

*School of Chemical Engineering, University of Science and Technology Liaoning,*

*Qianshan Road 185, Anshan 114051, China*

***Corresponding person: Yan Li***

***E-mail: yanli@ustl.edu.cn***

***Telephone: +86-412-5929627***

***Fax: +86-412-5929627***

# Content

|                                                             |            |
|-------------------------------------------------------------|------------|
| <b>1. Computational details.....</b>                        | <b>S1</b>  |
| <b>2. Test results of different functionals.....</b>        | <b>S2</b>  |
| <b>3. Other possible pathways.....</b>                      | <b>S3</b>  |
| <b>4. IRC results of key transition states .....</b>        | <b>S5</b>  |
| <b>5. Energies of all the structures.....</b>               | <b>S7</b>  |
| <b>6. Imaginary frequencies of transition states.....</b>   | <b>S9</b>  |
| <b>7. Cartesian coordinates of all the structures .....</b> | <b>S10</b> |



## 1. Computational details

### Distortion-interaction analysis

In distortion-interaction analysis, the transition state was divided into two fragments, followed by single point energy calculations on each fragment. The activation energy  $\Delta E^\ddagger$  was divided into  $\Delta E_{\text{dist}}^\ddagger$  and  $\Delta E_{\text{int}}^\ddagger$ , where  $\Delta E_{\text{dist}}^\ddagger$  and  $\Delta E_{\text{int}}^\ddagger$  are distortion energy and interaction energy, respectively. The distortion energy  $\Delta E_{\text{dist}}^\ddagger$  of each fragment is the energy difference between the distorted fragment and the corresponding optimized structure without the other fragment. The interaction energy  $\Delta E_{\text{int}}^\ddagger$  can be calculated using  $\Delta E_{\text{int}}^\ddagger = \Delta E^\ddagger - \Delta E_{\text{dist}}^\ddagger$ .

## 2. Test results of different functionals

**Table S1.** The relative Gibbs free energies (in kcal/mol) of key intermediates and transition states with different DFT functionals.

| Complex     | M06L  | M06  | B3LYP-<br>D3(BJ) | $\omega$ B97X-D | M06-2X-D3 |
|-------------|-------|------|------------------|-----------------|-----------|
| <b>A1</b>   | 0.0   | 0.0  | 0.0              | 0.0             | 0.0       |
| <b>A4</b>   | -11.5 | -7.4 | -5.9             | -12.1           | -8.6      |
| <b>A1a</b>  | -6.0  | -3.5 | -5.2             | -2.8            | -1.3      |
| <b>TSB8</b> | 14.4  | 15.9 | 16.3             | 13.6            | 11.1      |
| <b>TSB9</b> | 17.0  | 21.6 | 19.0             | 21.0            | 16.2      |

### 3. Other possible pathways

**Fig. S1** Other possible pathway for the transformation of **B4** → **A1a**.

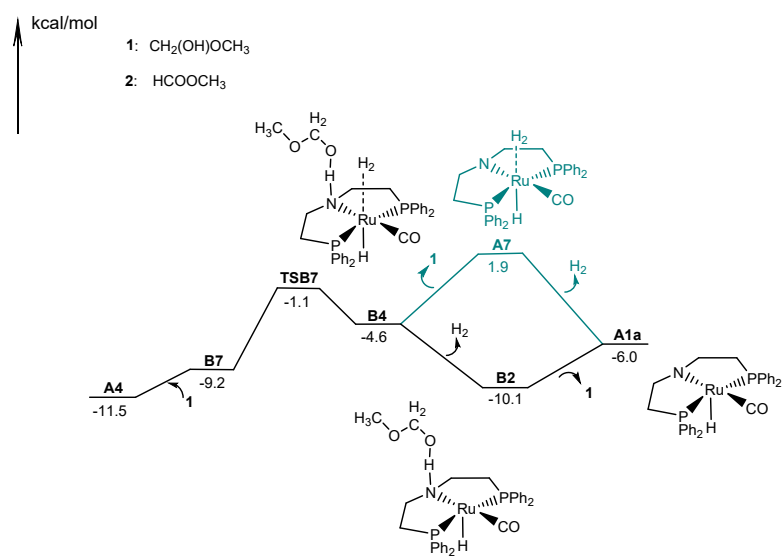

**Fig. S2** Other possible pathway for the transformation of **B13** → **A1b**.

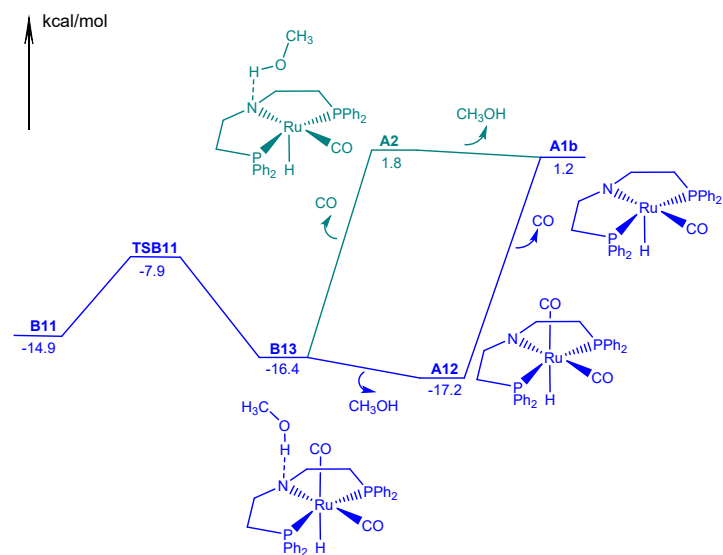

**Fig. S3** The CH<sub>3</sub>OH acts at the co-catalyst for the transformation of **A1a** → **B9**.

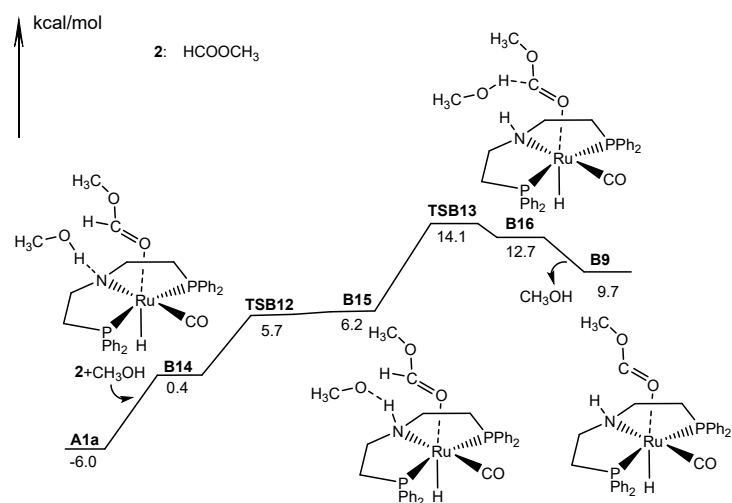

**Fig. S4** The CH<sub>3</sub>OH acts at the co-catalyst for the transformation of **B11** → **B13**.

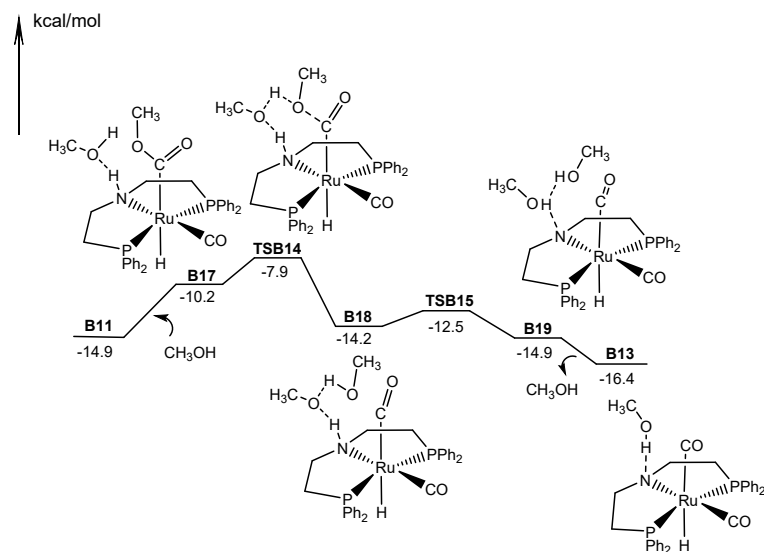

#### 4. IRC results of key transition states

Fig. S5 IRC result of TSA2.

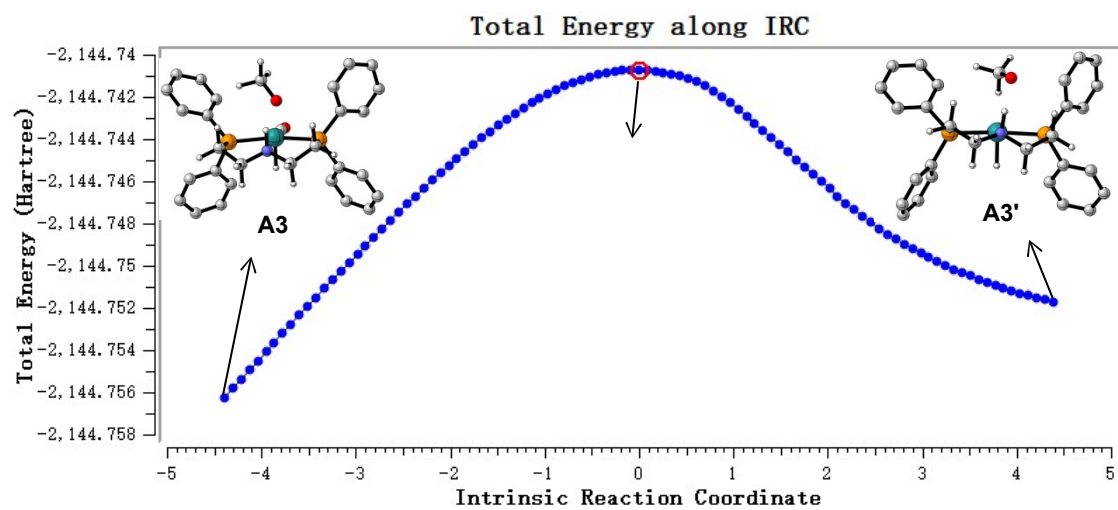

Fig. S6 IRC result of TSA7.

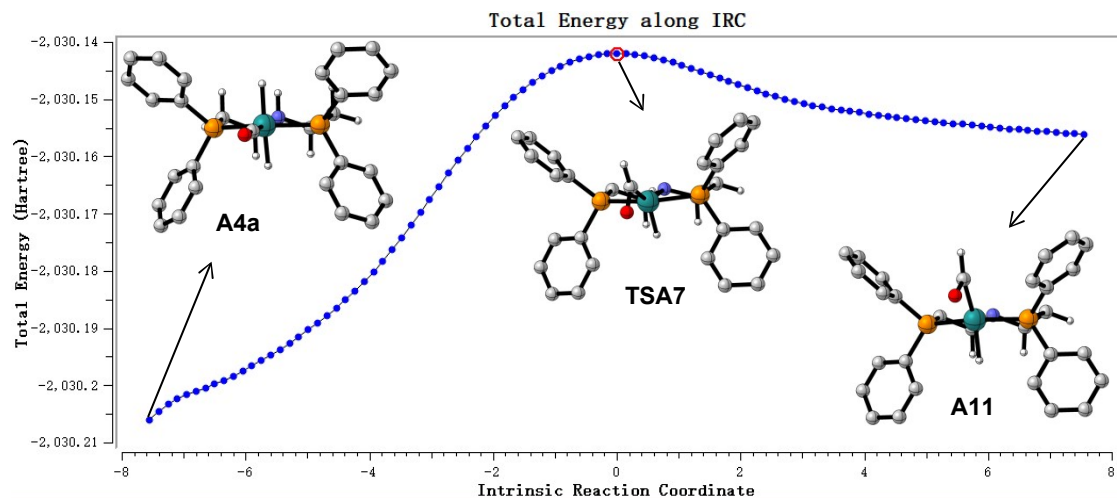



**Fig. S7** IRC results of TSB6.

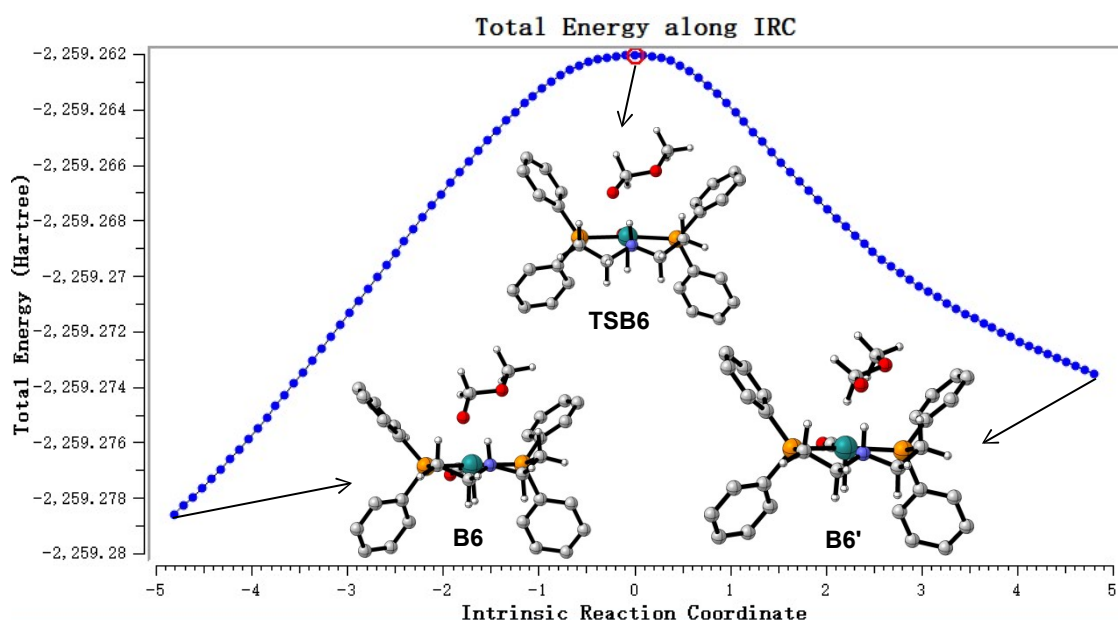

## 5. Energies of all the structures

**Table S2.** The calculated absolute electronic energies ( $E$ , in a.u.), thermal free energies ( $G$ , in a.u.), and relative Gibbs energies ( $\Delta G$ , in kcal/mol) (Calculated at 298.15 K and 1 atm).

| Complex      | $E$      | $G_{corr}$   | $G$          | $\Delta G$ |
|--------------|----------|--------------|--------------|------------|
| <b>A1</b>    | 0.439306 | -2030.493005 | -2030.053699 | 0.0        |
| <b>A2</b>    | 0.48869  | -2146.254819 | -2145.766129 | 0.6        |
| <b>A3</b>    | 0.492676 | -2146.266795 | -2145.774119 | -4.4       |
| <b>A3'</b>   | 0.487841 | -2146.250666 | -2145.762825 | 2.7        |
| <b>A4</b>    | 0.461194 | -2031.696334 | -2031.23514  | 8.5        |
| <b>A5</b>    | 0.509413 | -2147.456378 | -2146.946965 | 9.5        |
| <b>A6</b>    | 0.500252 | -2147.432515 | -2146.932263 | 18.7       |
| <b>A7</b>    | 0.453534 | -2031.6673   | -2031.213766 | 21.9       |
| <b>A8</b>    | 0.465967 | -2145.028532 | -2144.562565 | 20.0       |
| <b>A9</b>    | 0.465428 | -2145.003392 | -2144.537964 | 35.4       |
| <b>A10</b>   | 0.469041 | -2145.051378 | -2144.582337 | 7.6        |
| <b>A11</b>   | 0.458587 | -2031.614122 | -2031.155535 | 62.2       |
| <b>A12</b>   | 0.44369  | -2143.866494 | -2143.422804 | -0.6       |
| <b>TSA1</b>  | 0.484787 | -2146.250182 | -2145.765395 | 1.1        |
| <b>TSA2</b>  | 0.488126 | -2146.237112 | -2145.748986 | 11.4       |
| <b>TSA2'</b> | 0.485692 | -2146.237781 | -2145.752089 | 9.4        |
| <b>TSA3</b>  | 0.451122 | -2031.651377 | -2031.200255 | 30.4       |
| <b>TSA4</b>  | 0.501149 | -2147.421332 | -2146.920183 | 26.3       |
| <b>TSA5</b>  | 0.463788 | -2144.998574 | -2144.534786 | 37.4       |
| <b>TSA6</b>  | 0.462882 | -2144.985257 | -2144.522375 | 45.2       |
| <b>TSA7</b>  | 0.456465 | -2031.59837  | -2031.141905 | 70.8       |
| <b>TSA8</b>  | 0.456719 | -2145.017122 | -2144.560403 | 21.4       |
| <b>B1</b>    | 0.522497 | -2260.818437 | -2260.29594  | -6.5       |
| <b>B2</b>    | 0.523742 | -2260.811672 | -2260.28793  | -1.5       |
| <b>B3</b>    | 0.536737 | -2261.990263 | -2261.453526 | 17.0       |
| <b>B4</b>    | 0.532638 | -2261.984511 | -2261.451873 | 18.0       |
| <b>B5</b>    | 0.518244 | -2260.798919 | -2260.280675 | 05         |
| <b>B6</b>    | 0.523588 | -2260.819083 | -2260.295495 | -8.8       |
| <b>B6'</b>   | 0.522191 | -2260.810006 | -2260.287815 | -4.0       |
| <b>B7</b>    | 0.541185 | -2262.000454 | -2261.459269 | -9.2       |
| <b>B8</b>    | 0.498936 | -2259.605703 | -2259.106767 | 1.3        |
| <b>B9</b>    | 0.495623 | -2259.588999 | -2259.093376 | 9.7        |
| <b>B10</b>   | 0.501732 | -2259.614852 | -2259.11312  | -2.7       |
| <b>B11</b>   | 0.502654 | -2259.635229 | -2259.132575 | -14.9      |
| <b>B12</b>   | 0.491885 | -2146.219348 | -2145.727463 | 26.1       |
| <b>B13</b>   | 0.497288 | -2259.632162 | -2259.134874 | -16.4      |
| <b>B14</b>   | 0.550477 | -2375.37201  | -2374.821533 | 0.4        |

|                    |           |              |              |       |
|--------------------|-----------|--------------|--------------|-------|
| <b>B15</b>         | 0.551037  | -2375.3634   | -2374.812363 | 6.2   |
| <b>B16</b>         | 0.547301  | -2375.34931  | -2374.802009 | 12.7  |
| <b>B17</b>         | 0.552909  | -2375.391396 | -2374.838487 | -10.2 |
| <b>B18</b>         | 0.544135  | -2375.389019 | -2374.844884 | -14.2 |
| <b>B19</b>         | 0.54513   | -2375.391043 | -2374.845913 | -14.9 |
| <b>TSB1</b>        | 0.051724  | -230.216243  | -230.164519  | 42.3  |
| <b>TSB2</b>        | 0.098969  | -345.994047  | -345.895078  | 31.5  |
| <b>TSB3</b>        | 0.520535  | -2260.810709 | -2260.290174 | -2.9  |
| <b>TSB4</b>        | 0.53579   | -2261.970208 | -2261.434418 | 29.0  |
| <b>TSB5</b>        | 0.516189  | -2260.796336 | -2260.280147 | 0.8   |
| <b>TSB6</b>        | 0.522943  | -2260.79253  | -2260.269587 | 7.5   |
| <b>TSB6'</b>       | 0.517583  | -2260.807072 | -2260.289489 | -5.0  |
| <b>TSB7</b>        | 0.531033  | -2261.977349 | -2261.446316 | -1.1  |
| <b>TSB8</b>        | 0.493709  | -2259.579618 | -2259.085909 | 14.4  |
| <b>TSB9</b>        | 0.495977  | -2259.577728 | -2259.081751 | 17.0  |
| <b>TSB10</b>       | 0.490174  | -2146.215283 | -2145.725109 | 27.6  |
| <b>TSB11</b>       | 0.499062  | -2259.620468 | -2259.121406 | -7.9  |
| <b>TSB12</b>       | 0.547433  | -2375.360528 | -2374.813095 | 5.7   |
| <b>TSB13</b>       | 0.548557  | -2375.34836  | -2374.799803 | 14.1  |
| <b>TSB14</b>       | 0.547189  | -2375.381994 | -2374.834805 | -7.9  |
| <b>TSB15</b>       | 0.544961  | -2375.387123 | -2374.842162 | -12.5 |
| CH <sub>3</sub> OH | 0.028782  | -115.742197  | -115.713415  | /     |
| HCHO               | 0.004972  | -114.523453  | -114.518481  | /     |
| H <sub>2</sub>     | -0.00159  | -1.17107     | -1.17266     | /     |
| CO                 | -0.014114 | -113.325645  | -113.339759  | /     |
| <b>1</b>           | 0.057559  | -230.285322  | -230.227763  | /     |
| <b>2</b>           | 0.034252  | -229.098943  | -229.064691  | /     |

---

## 6. Imaginary frequencies of transition states

**Table S3.** Calculated imaginary frequencies of transition states at M06L level.

---

|              |                   |
|--------------|-------------------|
| <b>TSA1</b>  | 871.64 <i>i</i>   |
| <b>TSA2</b>  | 279.21 <i>i</i>   |
| <b>TSA2'</b> | -110.91 <i>i</i>  |
| <b>TSA3</b>  | 1826.59 <i>i</i>  |
| <b>TSA4</b>  | 1105.63 <i>i</i>  |
| <b>TSA5</b>  | 1055.13 <i>i</i>  |
| <b>TSA6</b>  | 329.94 <i>i</i>   |
| <b>TSA7</b>  | 355.81 <i>i</i>   |
| <b>TSA8</b>  | 912.82 <i>i</i>   |
| <b>TSB1</b>  | 1700.04 <i>i</i>  |
| <b>TSB2</b>  | 1329.75 <i>i</i>  |
| <b>TSB3</b>  | 508.74 <i>i</i>   |
| <b>TSB4</b>  | 1030.65 <i>i</i>  |
| <b>TSB5</b>  | 848.91 <i>i</i>   |
| <b>TSB6</b>  | 262.94 <i>i</i>   |
| <b>TSB6'</b> | -458.15 <i>i</i>  |
| <b>TSB7</b>  | 1009.71 <i>i</i>  |
| <b>TSB8</b>  | 903.77 <i>i</i>   |
| <b>TSB9</b>  | 165.47 <i>i</i>   |
| <b>TSB10</b> | 226.69 <i>i</i>   |
| <b>TSB11</b> | 112.21 <i>i</i>   |
| <b>TSB12</b> | -1154.70 <i>i</i> |
| <b>TSB13</b> | -206.65 <i>i</i>  |
| <b>TSB14</b> | -468.75 <i>i</i>  |
| <b>TSB15</b> | -912.22 <i>i</i>  |

## 7. Cartesian coordinates of all the structures

**Table S4.** Atomic cartesian coordinates of intermediates and transition states at M06L (Lan12DZ & 6-31G(d)) level (presented in Å).

**A1**

| ----- |                         |             |             |
|-------|-------------------------|-------------|-------------|
|       | Coordinates (Angstroms) |             |             |
|       | X                       | Y           | Z           |
| ----- |                         |             |             |
| N     | 0.03230200              | -0.98115800 | -1.07839200 |
| C     | 2.47124200              | -0.98861100 | -1.15815100 |
| H     | 2.55523900              | -0.36648700 | -2.05927200 |
| H     | 3.37131600              | -1.61289800 | -1.07920700 |
| C     | -2.33991200             | -0.72216000 | -1.56930900 |
| C     | 0.06229400              | 2.50892700  | 0.55410600  |
| O     | 0.08817800              | 3.66659800  | 0.75326500  |
| P     | -2.27899600             | 0.43300000  | -0.13711700 |
| P     | 2.28438400              | 0.15968600  | 0.27406800  |
| C     | 2.76825800              | -0.89946400 | 1.69054400  |
| C     | 4.06429100              | -0.90959500 | 2.21811700  |
| C     | 1.80977100              | -1.77261500 | 2.22312600  |
| C     | 4.39386600              | -1.77272700 | 3.25997700  |
| H     | 4.82054300              | -0.23408000 | 1.81889500  |
| C     | 2.14623900              | -2.64474400 | 3.25360200  |
| H     | 0.79156100              | -1.74703800 | 1.82884800  |
| C     | 3.43773800              | -2.64335700 | 3.77692100  |
| H     | 5.40272900              | -1.76305800 | 3.66991000  |
| H     | 1.39333900              | -3.31968400 | 3.65735800  |
| H     | 3.69720600              | -3.31605000 | 4.59292400  |
| C     | 3.65465300              | 1.35225600  | 0.13082100  |
| C     | 4.68102300              | 1.19374800  | -0.80691000 |
| C     | 3.67920200              | 2.46483100  | 0.98342600  |
| C     | 5.70809000              | 2.12997300  | -0.89619600 |
| H     | 4.68573500              | 0.33191300  | -1.47213800 |
| C     | 4.71161300              | 3.39299100  | 0.89949100  |
| H     | 2.88391500              | 2.59987800  | 1.71676500  |
| C     | 5.72530200              | 3.23001800  | -0.04353800 |
| H     | 6.49754400              | 1.99634500  | -1.63387900 |
| H     | 4.71994500              | 4.25238900  | 1.56760700  |
| H     | 6.52718300              | 3.96302400  | -0.11426700 |
| C     | -3.14721800             | -0.41150600 | 1.23007000  |
| C     | -3.07866500             | 0.16594400  | 2.50635200  |
| C     | -3.85488700             | -1.60770900 | 1.06847500  |
| C     | -3.71451400             | -0.43121600 | 3.58837400  |
| H     | -2.51173800             | 1.08702100  | 2.64597500  |

|    |             |             |             |
|----|-------------|-------------|-------------|
| C  | -4.48026800 | -2.21268100 | 2.15745600  |
| H  | -3.92236400 | -2.08019800 | 0.08984100  |
| C  | -4.41449500 | -1.62505100 | 3.41671700  |
| H  | -3.65547300 | 0.03148300  | 4.57202400  |
| H  | -5.02126000 | -3.14718600 | 2.01656900  |
| H  | -4.90446300 | -2.09834000 | 4.26595700  |
| C  | -3.40171000 | 1.79667200  | -0.60691800 |
| C  | -2.86711100 | 2.86661200  | -1.33526200 |
| C  | -4.76658500 | 1.79656900  | -0.29714300 |
| C  | -3.68416700 | 3.90996100  | -1.75833800 |
| H  | -1.79992600 | 2.87722800  | -1.56268100 |
| C  | -5.58107000 | 2.84525600  | -0.71602200 |
| H  | -5.19309800 | 0.97467900  | 0.27805800  |
| C  | -5.04237900 | 3.90116100  | -1.44772400 |
| H  | -3.25595600 | 4.73778300  | -2.32094400 |
| H  | -6.64087900 | 2.83829800  | -0.46672300 |
| H  | -5.68039300 | 4.72261600  | -1.76971000 |
| H  | -3.31162400 | -1.21816500 | -1.69249700 |
| H  | -2.18640500 | -0.08967700 | -2.45394100 |
| Ru | 0.01764400  | 0.69146900  | 0.13094500  |
| H  | -0.12750700 | 0.51315300  | 1.71512800  |
| C  | 1.20495200  | -1.82309200 | -1.23744700 |
| H  | 1.24182800  | -2.62560900 | -0.47151600 |
| H  | 1.17009800  | -2.34572200 | -2.21147900 |
| C  | -1.18095100 | -1.69496200 | -1.43875200 |
| H  | -1.03769700 | -2.22873000 | -2.39685500 |
| H  | -1.42954300 | -2.47950000 | -0.69347300 |

A2

Coordinates (Angstroms)

|   | X           | Y           | Z           |
|---|-------------|-------------|-------------|
| C | 3.21252400  | 1.42224300  | -0.92271100 |
| H | 3.25175000  | 0.56712900  | -1.61531800 |
| H | 3.74247500  | 2.26949700  | -1.38429300 |
| H | 3.74015600  | 1.13842000  | -0.00639400 |
| O | 1.88978900  | 1.78072300  | -0.57472000 |
| H | 1.29760300  | 1.76406300  | -1.39300100 |
| N | -0.25631700 | 1.08757900  | -1.97150200 |
| C | 0.86567500  | -0.75758200 | -3.10551600 |
| H | 1.78971200  | -0.18444100 | -3.27042400 |
| H | 0.79423900  | -1.50631000 | -3.90489800 |
| C | -1.29810800 | 2.96341800  | -0.81773100 |
| C | 0.49770400  | -0.60331400 | 1.61990500  |
| O | 0.66710500  | -1.10732000 | 2.66834700  |

|   |             |             |             |
|---|-------------|-------------|-------------|
| P | -1.19448200 | 1.93291000  | 0.71014400  |
| P | 0.99891500  | -1.51093800 | -1.42490800 |
| C | 0.10574500  | -3.11023600 | -1.53103900 |
| C | -0.69667800 | -3.53128800 | -0.46583600 |
| C | 0.26220800  | -3.95484500 | -2.63733400 |
| C | -1.33764800 | -4.76731100 | -0.51057400 |
| H | -0.81815300 | -2.87856800 | 0.39830600  |
| C | -0.38564300 | -5.18473200 | -2.68585500 |
| H | 0.90250400  | -3.65518400 | -3.46772700 |
| C | -1.18796000 | -5.59280700 | -1.62144300 |
| H | -1.95909600 | -5.08276900 | 0.32575100  |
| H | -0.26128000 | -5.82833000 | -3.55520400 |
| H | -1.69377600 | -6.55614100 | -1.65840500 |
| C | 2.74009400  | -2.06945500 | -1.31000000 |
| C | 3.51795200  | -2.34516000 | -2.44162500 |
| C | 3.31327600  | -2.21550700 | -0.04092300 |
| C | 4.84203000  | -2.75425500 | -2.30516100 |
| H | 3.09196200  | -2.23413100 | -3.43895700 |
| C | 4.63446900  | -2.63136900 | 0.09429300  |
| H | 2.71915500  | -1.98670600 | 0.84478500  |
| C | 5.40191400  | -2.89858700 | -1.03764700 |
| H | 5.43805300  | -2.96036400 | -3.19279700 |
| H | 5.06827200  | -2.73794600 | 1.08701700  |
| H | 6.43821100  | -3.21501800 | -0.93255400 |
| C | -2.92115000 | 1.56102000  | 1.18037800  |
| C | -3.21168300 | 0.33462700  | 1.78946300  |
| C | -3.95548600 | 2.48873700  | 1.00128300  |
| C | -4.50636500 | 0.04176700  | 2.20901500  |
| H | -2.41214800 | -0.39326200 | 1.92684700  |
| C | -5.25210900 | 2.19120700  | 1.41139300  |
| H | -3.74885800 | 3.45865900  | 0.54947200  |
| C | -5.52917400 | 0.96744800  | 2.01700700  |
| H | -4.71676400 | -0.91509800 | 2.68357900  |
| H | -6.04734700 | 2.91924100  | 1.26004700  |
| H | -6.54332900 | 0.73534200  | 2.33780500  |
| C | -0.62974500 | 3.09408600  | 2.00804600  |
| C | 0.69126000  | 3.55967400  | 1.92624100  |
| C | -1.43001900 | 3.50375200  | 3.08038200  |
| C | 1.18705200  | 4.43780200  | 2.88372300  |
| H | 1.32732700  | 3.21617400  | 1.10926300  |
| C | -0.92505300 | 4.37708600  | 4.04169900  |
| H | -2.45232700 | 3.13965500  | 3.17075000  |
| C | 0.38044300  | 4.84942700  | 3.94390900  |
| H | 2.21276900  | 4.79552200  | 2.80741200  |

|    |             |             |             |
|----|-------------|-------------|-------------|
| H  | -1.55810800 | 4.68705700  | 4.87170200  |
| H  | 0.77240700  | 5.53180500  | 4.69634300  |
| H  | -2.13201800 | 3.67629200  | -0.79621600 |
| H  | -0.37046300 | 3.55218300  | -0.85424300 |
| Ru | 0.12321000  | 0.15087200  | -0.04354000 |
| H  | -1.22920600 | -0.69713800 | -0.08421600 |
| C  | -0.32772500 | 0.18412000  | -3.10384200 |
| H  | -1.26492800 | -0.41263200 | -3.09959900 |
| H  | -0.34023400 | 0.75232100  | -4.05483200 |
| C  | -1.36497000 | 2.02414700  | -2.00970800 |
| H  | -1.33957500 | 2.61806400  | -2.94473400 |
| H  | -2.34783800 | 1.50437700  | -2.01291000 |

### TSA1

| -----                   |             |             |             |
|-------------------------|-------------|-------------|-------------|
| Coordinates (Angstroms) |             |             |             |
|                         | X           | Y           | Z           |
| -----                   |             |             |             |
| C                       | 3.08391200  | 1.57700300  | -1.00795700 |
| H                       | 3.20979000  | 0.72221600  | -1.69876700 |
| H                       | 3.57712300  | 2.44959200  | -1.47216700 |
| H                       | 3.63961500  | 1.32964600  | -0.09115900 |
| O                       | 1.74876300  | 1.85384900  | -0.70386800 |
| H                       | 0.98876600  | 1.68248800  | -1.58339300 |
| N                       | -0.19495300 | 1.15646700  | -2.00261100 |
| C                       | 0.96730000  | -0.68024100 | -3.11315200 |
| H                       | 1.89638100  | -0.11314200 | -3.26717500 |
| H                       | 0.90626400  | -1.42900800 | -3.91299600 |
| C                       | -1.18899000 | 3.04365000  | -0.82920800 |
| C                       | 0.53864000  | -0.52472300 | 1.61485600  |
| O                       | 0.72505100  | -0.99986600 | 2.67311000  |
| P                       | -1.13128100 | 2.00514900  | 0.69751300  |
| P                       | 1.08094400  | -1.44288400 | -1.42986500 |
| C                       | 0.21756700  | -3.05634600 | -1.56994700 |
| C                       | -0.59491200 | -3.49990000 | -0.52159800 |
| C                       | 0.40104500  | -3.88689200 | -2.68283900 |
| C                       | -1.21985600 | -4.74299800 | -0.58937400 |
| H                       | -0.73779100 | -2.85808200 | 0.34719600  |
| C                       | -0.23072600 | -5.12407800 | -2.75445300 |
| H                       | 1.04949300  | -3.57170800 | -3.50100200 |
| C                       | -1.04396700 | -5.55384000 | -1.70709500 |
| H                       | -1.84972900 | -5.07526100 | 0.23401800  |
| H                       | -0.08517800 | -5.75600700 | -3.62906900 |
| H                       | -1.53784600 | -6.52244400 | -1.76293500 |
| C                       | 2.83238700  | -1.96116700 | -1.29728100 |
| C                       | 3.60307100  | -2.29329600 | -2.41877600 |



|    |             |             |             |
|----|-------------|-------------|-------------|
| C  | 3.41896400  | -2.02283700 | -0.02814100 |
| C  | 4.93292600  | -2.67772300 | -2.27179600 |
| H  | 3.16657900  | -2.24592000 | -3.41671000 |
| C  | 4.74689600  | -2.41380300 | 0.11813600  |
| H  | 2.83015800  | -1.74793900 | 0.84754100  |
| C  | 5.50650200  | -2.73899100 | -1.00336400 |
| H  | 5.52380400  | -2.92780600 | -3.15150600 |
| H  | 5.19163300  | -2.45439100 | 1.11084400  |
| H  | 6.54756500  | -3.03646900 | -0.89017900 |
| C  | -2.86750000 | 1.68847700  | 1.16628500  |
| C  | -3.19040900 | 0.47453900  | 1.78423100  |
| C  | -3.87624100 | 2.64210400  | 0.97795500  |
| C  | -4.49275100 | 0.21942700  | 2.20421500  |
| H  | -2.41028500 | -0.27323100 | 1.92747500  |
| C  | -5.18084800 | 2.38163700  | 1.38825900  |
| H  | -3.64328700 | 3.60296200  | 0.51932000  |
| C  | -5.49049300 | 1.17028000  | 2.00306900  |
| H  | -4.72915600 | -0.72779800 | 2.68572400  |
| H  | -5.95666000 | 3.12896700  | 1.23035000  |
| H  | -6.51089200 | 0.96752600  | 2.32390500  |
| C  | -0.51785100 | 3.13936900  | 1.99460100  |
| C  | 0.82550400  | 3.53748600  | 1.91531500  |
| C  | -1.30199000 | 3.58685800  | 3.06339400  |
| C  | 1.35995200  | 4.38899200  | 2.87607300  |
| H  | 1.43962400  | 3.16430700  | 1.09314100  |
| C  | -0.75723700 | 4.43315100  | 4.02720100  |
| H  | -2.34161300 | 3.27397300  | 3.14951700  |
| C  | 0.57084700  | 4.83900000  | 3.93401600  |
| H  | 2.40231300  | 4.69593200  | 2.80403500  |
| H  | -1.37674900 | 4.77402300  | 4.85530400  |
| H  | 0.99355200  | 5.50014000  | 4.68885500  |
| H  | -1.99683700 | 3.78545900  | -0.81100500 |
| H  | -0.23884000 | 3.59512900  | -0.84885200 |
| Ru | 0.15953000  | 0.20152800  | -0.04929100 |
| H  | -1.18607600 | -0.67749200 | -0.06261100 |
| C  | -0.22437100 | 0.26296100  | -3.14852500 |
| H  | -1.16310200 | -0.32210900 | -3.16031700 |
| H  | -0.20714300 | 0.83874900  | -4.09283900 |
| C  | -1.27761500 | 2.12909300  | -2.03998800 |
| H  | -1.22369200 | 2.73425800  | -2.96443600 |
| H  | -2.26103900 | 1.62137000  | -2.05951500 |

A3

Coordinates (Angstroms)

|   | <b>X</b>    | <b>Y</b>    | <b>Z</b>    |
|---|-------------|-------------|-------------|
| C | 2.91106900  | 1.38703500  | -0.24877900 |
| H | 3.42263100  | 0.59967000  | -0.84846000 |
| H | 3.49103900  | 2.31932100  | -0.42787600 |
| H | 3.09258000  | 1.11817400  | 0.81602800  |
| O | 1.58393800  | 1.56968200  | -0.55728900 |
| H | 0.44546400  | 1.45102600  | -2.04054900 |
| N | -0.46135000 | 0.95057500  | -2.04976000 |
| C | 0.77540100  | -0.85341400 | -3.09618900 |
| H | 1.65310100  | -0.20870000 | -3.24825800 |
| H | 0.77813400  | -1.61380700 | -3.88726200 |
| C | -1.33145400 | 2.87503200  | -0.86040600 |
| C | 0.43667700  | -0.63464200 | 1.60068000  |
| O | 0.67992100  | -1.07502100 | 2.66257900  |
| P | -1.22473600 | 1.89851400  | 0.70551600  |
| P | 0.94057200  | -1.59631100 | -1.40453600 |
| C | 0.12882600  | -3.23559000 | -1.58471800 |
| C | -0.93879100 | -3.60615300 | -0.76339000 |
| C | 0.58303000  | -4.13799200 | -2.55681700 |
| C | -1.54868900 | -4.85000700 | -0.91940700 |
| H | -1.29027400 | -2.90662400 | -0.00559300 |
| C | -0.02832300 | -5.37607500 | -2.71490900 |
| H | 1.43143700  | -3.87344200 | -3.19010400 |
| C | -1.09875400 | -5.73352100 | -1.89582000 |
| H | -2.38086900 | -5.12662300 | -0.27403300 |
| H | 0.33372600  | -6.06658500 | -3.47501100 |
| H | -1.57760600 | -6.70373300 | -2.01797400 |
| C | 2.70698900  | -2.05470200 | -1.29521400 |
| C | 3.53150700  | -2.18968000 | -2.41874600 |
| C | 3.25766100  | -2.25378100 | -0.02279500 |
| C | 4.87876500  | -2.50989600 | -2.27158000 |
| H | 3.12538400  | -2.03613600 | -3.41846800 |
| C | 4.60130600  | -2.58123900 | 0.12209500  |
| H | 2.63155800  | -2.12939200 | 0.86104400  |
| C | 5.41582800  | -2.70456300 | -1.00178700 |
| H | 5.51100600  | -2.60324800 | -3.15319500 |
| H | 5.01711400  | -2.72637200 | 1.11750800  |
| H | 6.47063200  | -2.94897400 | -0.88757200 |
| C | -2.95067500 | 1.64080400  | 1.24535700  |
| C | -3.28027100 | 0.45754200  | 1.91643000  |
| C | -3.93865100 | 2.61816900  | 1.07018300  |
| C | -4.56873000 | 0.25810900  | 2.40459800  |
| H | -2.51615900 | -0.30879400 | 2.04724400  |
| C | -5.23033200 | 2.41185800  | 1.54573800  |

|    |             |             |             |
|----|-------------|-------------|-------------|
| H  | -3.69874900 | 3.55823400  | 0.57349000  |
| C  | -5.54632400 | 1.23223200  | 2.21613900  |
| H  | -4.81032100 | -0.66387600 | 2.93078400  |
| H  | -5.98988500 | 3.17781500  | 1.39838000  |
| H  | -6.55536500 | 1.07348900  | 2.59314200  |
| C  | -0.55699900 | 3.08099600  | 1.92671000  |
| C  | 0.75133200  | 3.55013800  | 1.73137800  |
| C  | -1.26886500 | 3.48361800  | 3.06220800  |
| C  | 1.31914400  | 4.42896200  | 2.64767500  |
| H  | 1.30628100  | 3.18591500  | 0.86386600  |
| C  | -0.68980500 | 4.35934900  | 3.97785500  |
| H  | -2.27788600 | 3.11408300  | 3.23887000  |
| C  | 0.60063900  | 4.83767000  | 3.77075100  |
| H  | 2.33441200  | 4.79000400  | 2.48840800  |
| H  | -1.25267400 | 4.66592800  | 4.85813600  |
| H  | 1.04966000  | 5.52335600  | 4.48772200  |
| H  | -2.09166400 | 3.66454800  | -0.82675200 |
| H  | -0.35127200 | 3.36208300  | -0.96245000 |
| Ru | 0.01339500  | 0.05587500  | -0.05078800 |
| H  | -1.37949200 | -0.81262900 | -0.03744600 |
| C  | -0.48637200 | -0.00887500 | -3.15870600 |
| H  | -1.38575300 | -0.63118900 | -3.05605500 |
| H  | -0.55232300 | 0.51331200  | -4.12754000 |
| C  | -1.54969300 | 1.93502400  | -2.03416100 |
| H  | -1.57820900 | 2.49946400  | -2.98083900 |
| H  | -2.50266400 | 1.39531200  | -1.94189500 |

**TSA2**

| -----                   |             |             |             |
|-------------------------|-------------|-------------|-------------|
| Coordinates (Angstroms) |             |             |             |
|                         | X           | Y           | Z           |
| -----                   |             |             |             |
| C                       | 2.79465000  | 1.67597900  | -0.49798100 |
| H                       | 3.19737500  | 0.88600900  | -1.18805200 |
| H                       | 3.70580900  | 2.23262200  | -0.15994200 |
| H                       | 2.50070900  | 1.10724100  | 0.43982300  |
| O                       | 1.82565800  | 2.46309100  | -1.03046000 |
| H                       | 0.74875400  | 1.66790300  | -1.88723600 |
| N                       | -0.13933800 | 1.07150100  | -2.00775500 |
| C                       | 1.18523100  | -0.68647800 | -3.05161700 |
| H                       | 2.07486300  | -0.04400700 | -3.12193000 |
| H                       | 1.23422800  | -1.41227200 | -3.87323000 |
| C                       | -1.20659200 | 2.94538500  | -0.87188800 |
| C                       | 0.42519600  | -0.69833800 | 1.62319100  |
| O                       | 0.46090700  | -1.26651400 | 2.64837100  |
| P                       | -1.00388200 | 1.99385800  | 0.69992600  |

|   |             |             |             |
|---|-------------|-------------|-------------|
| P | 1.24040700  | -1.48945600 | -1.38658200 |
| C | 0.36102700  | -3.08184200 | -1.60783900 |
| C | -0.59810400 | -3.48529300 | -0.67344400 |
| C | 0.65229500  | -3.92466300 | -2.68872100 |
| C | -1.26177900 | -4.70108600 | -0.82278400 |
| H | -0.82333800 | -2.83801200 | 0.17357600  |
| C | -0.01563100 | -5.13467800 | -2.84121600 |
| H | 1.41475800  | -3.63944500 | -3.41453300 |
| C | -0.97635700 | -5.52357300 | -1.90871000 |
| H | -2.00614700 | -5.00379700 | -0.08855200 |
| H | 0.21633300  | -5.77711000 | -3.68892400 |
| H | -1.49899300 | -6.47086400 | -2.02930700 |
| C | 2.98431600  | -1.98939100 | -1.18249600 |
| C | 3.81099600  | -2.28181500 | -2.27470300 |
| C | 3.50704300  | -2.08635600 | 0.11258400  |
| C | 5.13240100  | -2.66932400 | -2.07266800 |
| H | 3.42583500  | -2.20018600 | -3.29126000 |
| C | 4.82697500  | -2.47894200 | 0.31235400  |
| H | 2.87627000  | -1.84004200 | 0.96700300  |
| C | 5.64115800  | -2.77055000 | -0.77953700 |
| H | 5.76754400  | -2.88955300 | -2.92893600 |
| H | 5.22220100  | -2.54744500 | 1.32407500  |
| H | 6.67593700  | -3.07034800 | -0.62373700 |
| C | -2.71189100 | 1.69378400  | 1.27970900  |
| C | -3.09548700 | 0.42528200  | 1.72687100  |
| C | -3.65227400 | 2.73385500  | 1.30464500  |
| C | -4.39331000 | 0.19683200  | 2.17934300  |
| H | -2.36805700 | -0.38573700 | 1.71692300  |
| C | -4.94881400 | 2.50453600  | 1.75229500  |
| H | -3.36356600 | 3.73562100  | 0.98540200  |
| C | -5.32163000 | 1.23391000  | 2.18874300  |
| H | -4.67838400 | -0.79558500 | 2.52386000  |
| H | -5.67032300 | 3.31974400  | 1.76303700  |
| H | -6.33730500 | 1.05455700  | 2.53723900  |
| C | -0.31732800 | 3.18316400  | 1.90197900  |
| C | 0.89445300  | 3.81520000  | 1.58097200  |
| C | -0.91242300 | 3.41454800  | 3.14790600  |
| C | 1.47645900  | 4.68891700  | 2.49435500  |
| H | 1.36994100  | 3.58718100  | 0.61618800  |
| C | -0.31574900 | 4.28601900  | 4.05593500  |
| H | -1.84421400 | 2.91700000  | 3.41363800  |
| C | 0.87590100  | 4.92810800  | 3.72978400  |
| H | 2.41384900  | 5.18234700  | 2.24094000  |
| H | -0.78735600 | 4.46160300  | 5.02158000  |

|    |             |             |             |
|----|-------------|-------------|-------------|
| H  | 1.33967600  | 5.60944400  | 4.44159100  |
| H  | -2.08006800 | 3.60801500  | -0.83796300 |
| H  | -0.30536000 | 3.56099700  | -0.97504600 |
| Ru | 0.24682500  | 0.14184600  | -0.01647900 |
| H  | -1.12560500 | -0.62127200 | -0.20129800 |
| C  | -0.07167800 | 0.16092100  | -3.14974100 |
| H  | -0.96892700 | -0.47745900 | -3.14858900 |
| H  | -0.07538100 | 0.72582700  | -4.09682700 |
| C  | -1.29724600 | 1.97095200  | -2.03365800 |
| H  | -1.32878800 | 2.52403900  | -2.98754400 |
| H  | -2.21785500 | 1.36991500  | -1.97419500 |

---

**A3'**

| <b>Coordinates (Angstroms)</b> |             |             |             |
|--------------------------------|-------------|-------------|-------------|
|                                | <b>X</b>    | <b>Y</b>    | <b>Z</b>    |
| C                              | 2.35792500  | 1.85528800  | -0.55119100 |
| H                              | 3.15018700  | 1.15326500  | -0.92473500 |
| H                              | 2.76550900  | 2.34661600  | 0.36823600  |
| H                              | 1.60930400  | 1.08798600  | -0.01900600 |
| O                              | 1.79344300  | 2.64240100  | -1.43656800 |
| H                              | 0.55703000  | 1.70471900  | -1.92499700 |
| N                              | -0.25256100 | 1.00949400  | -1.98218000 |
| C                              | 1.22821600  | -0.66715500 | -2.94184400 |
| H                              | 2.08339400  | 0.01019400  | -2.80646300 |
| H                              | 1.46444300  | -1.30555700 | -3.80238000 |
| C                              | -1.53953500 | 2.75974400  | -0.89897700 |
| C                              | 0.17659400  | -0.85273100 | 1.61531800  |
| O                              | 0.27634000  | -1.40148700 | 2.64647700  |
| P                              | -1.28610200 | 1.82724300  | 0.68365800  |
| P                              | 1.06113800  | -1.60006300 | -1.35711500 |
| C                              | 0.16422100  | -3.13913700 | -1.76148900 |
| C                              | -0.27014900 | -3.93463900 | -0.69154700 |
| C                              | -0.11495200 | -3.55393400 | -3.06780600 |
| C                              | -0.95035500 | -5.12383700 | -0.92476800 |
| H                              | -0.07847100 | -3.61105000 | 0.33225400  |
| C                              | -0.80826100 | -4.74101700 | -3.29981100 |
| H                              | 0.20263100  | -2.95243900 | -3.91825800 |
| C                              | -1.22262500 | -5.52937500 | -2.23090400 |
| H                              | -1.27675600 | -5.73286600 | -0.08370100 |
| H                              | -1.02290700 | -5.04794600 | -4.32208400 |
| H                              | -1.76319800 | -6.45640600 | -2.41344700 |
| C                              | 2.75304800  | -2.17331600 | -0.97674200 |
| C                              | 3.36871700  | -3.18642200 | -1.72310100 |
| C                              | 3.45869500  | -1.56528000 | 0.06771900  |

|    |             |             |             |
|----|-------------|-------------|-------------|
| C  | 4.67293200  | -3.57498900 | -1.43535000 |
| H  | 2.81974100  | -3.67869600 | -2.52694500 |
| C  | 4.76426300  | -1.95695100 | 0.35389300  |
| H  | 2.97533800  | -0.78407900 | 0.65667300  |
| C  | 5.37171100  | -2.95945100 | -0.39737400 |
| H  | 5.14492000  | -4.36336400 | -2.01925100 |
| H  | 5.30472100  | -1.47935300 | 1.16893900  |
| H  | 6.39117200  | -3.26709300 | -0.17097500 |
| C  | -2.96238300 | 1.55532500  | 1.35666600  |
| C  | -3.34934000 | 0.28291900  | 1.78728500  |
| C  | -3.86811500 | 2.61974100  | 1.47209900  |
| C  | -4.62138700 | 0.07488800  | 2.31686000  |
| H  | -2.64674700 | -0.54521600 | 1.69962400  |
| C  | -5.13924300 | 2.40924300  | 1.99490800  |
| H  | -3.57121900 | 3.62272200  | 1.16314200  |
| C  | -5.51752700 | 1.13504600  | 2.41757000  |
| H  | -4.91144400 | -0.92020100 | 2.64923000  |
| H  | -5.83631000 | 3.24153500  | 2.07638300  |
| H  | -6.51262100 | 0.97162800  | 2.82783800  |
| C  | -0.55764700 | 3.07032100  | 1.80761500  |
| C  | 0.53470300  | 3.83050400  | 1.36114200  |
| C  | -0.99576700 | 3.21156700  | 3.13016800  |
| C  | 1.15050200  | 4.73400000  | 2.22229400  |
| H  | 0.91407400  | 3.70440800  | 0.34203500  |
| C  | -0.36872700 | 4.11300200  | 3.98643000  |
| H  | -1.83349100 | 2.61799300  | 3.49450000  |
| C  | 0.70147600  | 4.88013000  | 3.53348100  |
| H  | 1.99301800  | 5.32379000  | 1.86425700  |
| H  | -0.72125000 | 4.21538600  | 5.01145600  |
| H  | 1.18947800  | 5.58607900  | 4.20356300  |
| H  | -2.47383600 | 3.33351500  | -0.88164400 |
| H  | -0.70707900 | 3.46937700  | -0.98984500 |
| Ru | -0.01712800 | -0.01254100 | -0.02353800 |
| H  | -1.40451000 | -0.81369000 | -0.25553800 |
| C  | -0.03208400 | 0.15170300  | -3.15840900 |
| H  | -0.91032300 | -0.49727500 | -3.28869300 |
| H  | 0.06062900  | 0.77021200  | -4.06565700 |
| C  | -1.49234400 | 1.79963800  | -2.07138000 |
| H  | -1.51809200 | 2.36099700  | -3.01997800 |
| H  | -2.34932200 | 1.11260000  | -2.06706900 |

-----  
**TSA2'**

-----  
**Coordinates (Angstroms)**

**X**

**Y**

**Z**  
-----

|   |             |             |             |
|---|-------------|-------------|-------------|
| C | 0.51729700  | 5.88670500  | -5.04524000 |
| H | -0.72321100 | 4.86965900  | -4.11513000 |
| H | 1.24010900  | 5.09386700  | -4.76151700 |
| H | 0.33886900  | 6.64586200  | -4.25434400 |
| O | 0.19198400  | 6.07978800  | -6.21994000 |
| H | -1.60321700 | 5.61488500  | -6.34358400 |
| N | -2.47119400 | 5.06435300  | -6.26293000 |
| C | -1.23433800 | 3.18955000  | -7.19560700 |
| H | -0.33310800 | 3.81632500  | -7.25154900 |
| H | -1.18062900 | 2.43781800  | -7.99312300 |
| C | -3.50296100 | 6.98308400  | -5.18013400 |
| C | -2.18787600 | 3.27016900  | -2.59874500 |
| O | -2.14939600 | 2.73421000  | -1.55314700 |
| P | -3.35719200 | 6.04627700  | -3.58741800 |
| P | -1.26603700 | 2.43017700  | -5.50954300 |
| C | -2.06323300 | 0.79645600  | -5.75523200 |
| C | -1.54994700 | -0.12290000 | -6.68011600 |
| C | -3.18583900 | 0.44783400  | -5.00025200 |
| C | -2.15967000 | -1.35946700 | -6.85807500 |
| H | -0.65924300 | 0.12769800  | -7.25888300 |
| C | -3.79147100 | -0.79538200 | -5.17307600 |
| H | -3.58305500 | 1.16728800  | -4.28436400 |
| C | -3.28302500 | -1.69714000 | -6.10334700 |
| H | -1.75535100 | -2.06479900 | -7.58230500 |
| H | -4.66506400 | -1.05771200 | -4.57867700 |
| H | -3.75823600 | -2.66725400 | -6.23996400 |
| C | 0.47286600  | 1.96818500  | -5.18910000 |
| C | 1.43717800  | 1.86206400  | -6.19822500 |
| C | 0.84936000  | 1.71446000  | -3.86384600 |
| C | 2.74905800  | 1.51063700  | -5.88644200 |
| H | 1.17222100  | 2.06192700  | -7.23618200 |
| C | 2.15628800  | 1.35419900  | -3.55560000 |
| H | 0.11150200  | 1.81644300  | -3.06775900 |
| C | 3.11016600  | 1.25369600  | -4.56693100 |
| H | 3.49118200  | 1.43814700  | -6.67993100 |
| H | 2.43295900  | 1.16069200  | -2.52064300 |
| H | 4.13607000  | 0.98144000  | -4.32512200 |
| C | -5.06565100 | 5.99225200  | -2.92121400 |
| C | -5.59053200 | 4.77620600  | -2.47475200 |
| C | -5.84640500 | 7.15089700  | -2.81460600 |
| C | -6.87259400 | 4.71862000  | -1.93294500 |
| H | -4.98652000 | 3.87373100  | -2.56759400 |
| C | -7.13034700 | 7.09091700  | -2.28443800 |
| H | -5.44572900 | 8.11143300  | -3.14191000 |

|    |             |             |             |
|----|-------------|-------------|-------------|
| C  | -7.64469300 | 5.87310600  | -1.84073000 |
| H  | -7.26940800 | 3.76631800  | -1.58547700 |
| H  | -7.73066500 | 7.99662400  | -2.21430200 |
| H  | -8.64902800 | 5.82667800  | -1.42269700 |
| C  | -2.53670100 | 7.23765800  | -2.46585800 |
| C  | -1.77894700 | 6.73856800  | -1.39983900 |
| C  | -2.63854400 | 8.62445300  | -2.63297400 |
| C  | -1.14930600 | 7.60663300  | -0.51330600 |
| H  | -1.67108100 | 5.66071200  | -1.27724400 |
| C  | -2.00028400 | 9.49222100  | -1.75061900 |
| H  | -3.21428700 | 9.03581300  | -3.46248600 |
| C  | -1.25760000 | 8.98458800  | -0.68772500 |
| H  | -0.56316700 | 7.20431900  | 0.31120800  |
| H  | -2.08188600 | 10.56815300 | -1.89662500 |
| H  | -0.75814100 | 9.66346000  | 0.00147100  |
| H  | -4.35032000 | 7.68038900  | -5.18089400 |
| H  | -2.58479100 | 7.57845000  | -5.29104600 |
| Ru | -2.28721400 | 4.09148100  | -4.24301200 |
| H  | -3.80716200 | 3.42740000  | -4.57853900 |
| C  | -2.45547900 | 4.07497100  | -7.35698200 |
| H  | -3.38496800 | 3.49365500  | -7.29682400 |
| H  | -2.43642900 | 4.58509300  | -8.33371900 |
| C  | -3.60870000 | 5.99779100  | -6.32908900 |
| H  | -3.61591600 | 6.52874000  | -7.29491100 |
| H  | -4.53138200 | 5.40736000  | -6.26106700 |

A4

| -----                          |             |             |             |
|--------------------------------|-------------|-------------|-------------|
| <b>Coordinates (Angstroms)</b> |             |             |             |
|                                | <b>X</b>    | <b>Y</b>    | <b>Z</b>    |
| -----                          |             |             |             |
| N                              | -0.13068700 | -1.10870900 | -1.27073400 |
| C                              | 2.29787700  | -1.25496400 | -1.12007100 |
| H                              | 2.41295300  | -0.62679100 | -2.01458200 |
| H                              | 3.16712400  | -1.92304700 | -1.09437400 |
| C                              | -2.53531300 | -0.71468400 | -1.37264600 |
| C                              | 0.03714500  | 1.74985400  | 1.67656300  |
| O                              | 0.09804200  | 2.58946200  | 2.49783100  |
| P                              | -2.33544000 | 0.43231400  | 0.07031000  |
| P                              | 2.21342100  | -0.09943900 | 0.32748500  |
| C                              | 2.92198900  | -1.04008000 | 1.73395700  |
| C                              | 2.52251100  | -0.66944700 | 3.02423200  |
| C                              | 3.85228800  | -2.07616800 | 1.59124500  |
| C                              | 3.05520800  | -1.30281600 | 4.14153500  |
| H                              | 1.77252800  | 0.11233900  | 3.14373800  |
| C                              | 4.37468200  | -2.72153800 | 2.70994600  |



|    |             |             |             |
|----|-------------|-------------|-------------|
| H  | 4.17944800  | -2.39313100 | 0.60123100  |
| C  | 3.98113700  | -2.33267800 | 3.98709600  |
| H  | 2.73611500  | -0.99922200 | 5.13714800  |
| H  | 5.09208400  | -3.53054200 | 2.58054100  |
| H  | 4.39114700  | -2.83583500 | 4.86140200  |
| C  | 3.52798200  | 1.13023200  | -0.02103800 |
| C  | 4.87906900  | 0.76825700  | -0.10081800 |
| C  | 3.17084600  | 2.46998900  | -0.20153700 |
| C  | 5.85160200  | 1.72678000  | -0.36499500 |
| H  | 5.17606000  | -0.26869200 | 0.05982400  |
| C  | 4.14740900  | 3.43043700  | -0.45717700 |
| H  | 2.11798100  | 2.74715100  | -0.14509300 |
| C  | 5.48657100  | 3.06091400  | -0.54111300 |
| H  | 6.89865300  | 1.43388400  | -0.42551600 |
| H  | 3.85834700  | 4.47203800  | -0.58831900 |
| H  | 6.24977700  | 3.81249400  | -0.73673300 |
| C  | -3.39325700 | -0.27117300 | 1.39524600  |
| C  | -3.03219000 | -0.00731100 | 2.72232000  |
| C  | -4.55444900 | -1.01344800 | 1.15051200  |
| C  | -3.82306600 | -0.45438200 | 3.77551900  |
| H  | -2.10969900 | 0.53822500  | 2.92194900  |
| C  | -5.33870600 | -1.47450300 | 2.20521300  |
| H  | -4.85883000 | -1.24244800 | 0.12956600  |
| C  | -4.97783000 | -1.19068000 | 3.51940500  |
| H  | -3.52978000 | -0.23599300 | 4.80091300  |
| H  | -6.23445100 | -2.05765200 | 1.99673000  |
| H  | -5.59251200 | -1.54884600 | 4.34370800  |
| C  | -3.28326100 | 1.92268700  | -0.42150700 |
| C  | -2.64295800 | 3.16535600  | -0.42766200 |
| C  | -4.63786400 | 1.85263400  | -0.77293300 |
| C  | -3.34542500 | 4.31740500  | -0.77565500 |
| H  | -1.58667800 | 3.21582300  | -0.16296000 |
| C  | -5.33542900 | 3.00174000  | -1.12846400 |
| H  | -5.15790500 | 0.89417200  | -0.75784100 |
| C  | -4.68984800 | 4.23741300  | -1.12748900 |
| H  | -2.83800500 | 5.28082600  | -0.77053500 |
| H  | -6.38736800 | 2.93499100  | -1.40190700 |
| H  | -5.23883600 | 5.13806600  | -1.39783800 |
| H  | -3.52742600 | -1.17904400 | -1.42687400 |
| H  | -2.42367400 | -0.10367300 | -2.27944600 |
| Ru | -0.03947600 | 0.45677200  | 0.37555400  |
| H  | -0.24752900 | -0.85706600 | 1.45965900  |
| C  | 1.00443200  | -2.04491500 | -1.20214900 |
| H  | 0.86224300  | -2.65901400 | -0.30301300 |

|   |             |             |             |
|---|-------------|-------------|-------------|
| H | 1.00782500  | -2.71751100 | -2.07562800 |
| C | -1.44578100 | -1.77006700 | -1.31723700 |
| H | -1.51027100 | -2.44940700 | -2.18312500 |
| H | -1.53429900 | -2.37377100 | -0.40445000 |
| H | -0.02793000 | -0.55080200 | -2.11951000 |
| H | 0.16442200  | 1.60222100  | -0.90075500 |

---

**TSA3**

---

**Coordinates (Angstroms)**

|   | <b>X</b>    | <b>Y</b>    | <b>Z</b>    |
|---|-------------|-------------|-------------|
| N | -0.12646200 | -1.09175200 | -1.18693800 |
| C | 2.30497900  | -1.16610500 | -1.18843300 |
| H | 2.36214400  | -0.48290600 | -2.04681500 |
| H | 3.19907200  | -1.80081000 | -1.22899600 |
| C | -2.54489600 | -0.79938400 | -1.25573700 |
| C | 0.12906100  | 1.90463400  | 1.58506900  |
| O | 0.24261300  | 2.77187400  | 2.36835200  |
| P | -2.33778000 | 0.40590000  | 0.13136200  |
| P | 2.24289300  | -0.08364200 | 0.30406400  |
| C | 2.91456200  | -1.05761500 | 1.69676300  |
| C | 2.72184100  | -0.54880900 | 2.98871700  |
| C | 3.61306900  | -2.25927800 | 1.54190000  |
| C | 3.23410500  | -1.21489900 | 4.09568600  |
| H | 2.15548900  | 0.37371300  | 3.12178000  |
| C | 4.11464100  | -2.93369600 | 2.65419200  |
| H | 3.76816700  | -2.68402800 | 0.55104600  |
| C | 3.93062600  | -2.41148500 | 3.93071800  |
| H | 3.08016400  | -0.80429900 | 5.09201400  |
| H | 4.65045900  | -3.87171900 | 2.51853700  |
| H | 4.32433000  | -2.93834800 | 4.79820700  |
| C | 3.53837600  | 1.17223900  | 0.00619600  |
| C | 4.90045900  | 0.86390900  | 0.11592500  |
| C | 3.15786400  | 2.46636300  | -0.36615200 |
| C | 5.86330900  | 1.83203500  | -0.14961800 |
| H | 5.20818200  | -0.13699000 | 0.42076800  |
| C | 4.12415400  | 3.43365800  | -0.63213500 |
| H | 2.09721600  | 2.70860800  | -0.44387800 |
| C | 5.47602600  | 3.11795100  | -0.52425100 |
| H | 6.91961900  | 1.58352100  | -0.06059900 |
| H | 3.81818500  | 4.43853000  | -0.91787500 |
| H | 6.23087100  | 3.87619100  | -0.72591800 |
| C | -3.37194000 | -0.23437800 | 1.50219100  |
| C | -2.87290000 | -0.23244000 | 2.80798200  |
| C | -4.68035800 | -0.68005400 | 1.27423700  |

|    |             |             |             |
|----|-------------|-------------|-------------|
| C  | -3.66427000 | -0.67683200 | 3.86508200  |
| H  | -1.85525100 | 0.11425200  | 2.98655000  |
| C  | -5.46677000 | -1.13116700 | 2.32872700  |
| H  | -5.09341900 | -0.66677600 | 0.26476700  |
| C  | -4.95830600 | -1.13104100 | 3.62698300  |
| H  | -3.26425300 | -0.67115000 | 4.87747000  |
| H  | -6.48012600 | -1.48064500 | 2.13804600  |
| H  | -5.57437700 | -1.48300400 | 4.45272700  |
| C  | -3.28657600 | 1.87039800  | -0.41821800 |
| C  | -2.92870500 | 3.13099700  | 0.07281500  |
| C  | -4.37424300 | 1.76768400  | -1.29465800 |
| C  | -3.64930700 | 4.26350800  | -0.29494800 |
| H  | -2.07497900 | 3.22205200  | 0.74456900  |
| C  | -5.08949100 | 2.90213200  | -1.66810100 |
| H  | -4.66627100 | 0.79548800  | -1.69197800 |
| C  | -4.72922000 | 4.15134400  | -1.16765200 |
| H  | -3.35962300 | 5.23785000  | 0.09451900  |
| H  | -5.92978300 | 2.80960700  | -2.35429200 |
| H  | -5.28892400 | 5.03784400  | -1.46076500 |
| H  | -3.51186900 | -1.31653500 | -1.21950100 |
| H  | -2.51190600 | -0.21691100 | -2.18657500 |
| Ru | -0.01388300 | 0.49738000  | 0.38510300  |
| H  | -0.14103400 | -0.48658700 | 1.67215400  |
| C  | 1.01633800  | -1.97191200 | -1.25132800 |
| H  | 0.99908900  | -2.70546400 | -0.41646300 |
| H  | 1.00058700  | -2.56791500 | -2.18435700 |
| C  | -1.38984400 | -1.78836600 | -1.22663900 |
| H  | -1.45016000 | -2.44059600 | -2.11942300 |
| H  | -1.49973300 | -2.45737500 | -0.34668200 |
| H  | -0.00363500 | 0.27997700  | -1.59972300 |
| H  | 0.08849900  | 1.23774500  | -1.44274300 |

A5

| -----                   |             |             |             |
|-------------------------|-------------|-------------|-------------|
| Coordinates (Angstroms) |             |             |             |
|                         | X           | Y           | Z           |
| -----                   |             |             |             |
| N                       | 0.08800200  | -1.12549500 | -1.34313900 |
| C                       | 2.52480700  | -1.16404000 | -1.22002400 |
| H                       | 2.59271800  | -0.46189800 | -2.06320800 |
| H                       | 3.42638600  | -1.78832900 | -1.25252100 |
| C                       | -2.32434600 | -0.85447900 | -1.40734600 |
| C                       | 0.19835300  | 1.63433900  | 1.71072500  |
| O                       | 0.24350900  | 2.41458500  | 2.58828400  |
| P                       | -2.15090300 | 0.36977400  | -0.02218900 |
| P                       | 2.40007800  | -0.13982900 | 0.31579600  |

|   |             |             |             |
|---|-------------|-------------|-------------|
| C | 3.03360600  | -1.22462800 | 1.65192500  |
| C | 2.53362600  | -1.02207600 | 2.94433000  |
| C | 3.98186600  | -2.23473200 | 1.44898100  |
| C | 2.98000400  | -1.79859700 | 4.00797900  |
| H | 1.76963400  | -0.26107300 | 3.10325500  |
| C | 4.41816200  | -3.02284400 | 2.51178800  |
| H | 4.38512700  | -2.42112800 | 0.45377900  |
| C | 3.92066200  | -2.80410900 | 3.79329600  |
| H | 2.58025500  | -1.62772800 | 5.00605900  |
| H | 5.14815800  | -3.81136400 | 2.33544000  |
| H | 4.25966400  | -3.42196900 | 4.62322200  |
| C | 3.72286900  | 1.11365600  | 0.12513800  |
| C | 5.07595200  | 0.75629500  | 0.05775500  |
| C | 3.37201000  | 2.46487500  | 0.03997900  |
| C | 6.05577300  | 1.73009700  | -0.10349900 |
| H | 5.37004000  | -0.29027900 | 0.14095700  |
| C | 4.35557900  | 3.43948200  | -0.11455800 |
| H | 2.31875300  | 2.74211800  | 0.08505600  |
| C | 5.69654000  | 3.07443100  | -0.18817100 |
| H | 7.10370700  | 1.43949900  | -0.15735900 |
| H | 4.07017400  | 4.48834200  | -0.17508100 |
| H | 6.46473000  | 3.83650900  | -0.30879200 |
| C | -3.24407900 | -0.25733100 | 1.31185600  |
| C | -2.88719200 | 0.01380300  | 2.63827000  |
| C | -4.42897200 | -0.96136300 | 1.06620800  |
| C | -3.70131400 | -0.39382400 | 3.69024300  |
| H | -1.95108200 | 0.53330500  | 2.84083500  |
| C | -5.23682000 | -1.38226800 | 2.11940000  |
| H | -4.73198700 | -1.19438300 | 0.04587500  |
| C | -4.87699700 | -1.09498600 | 3.43340100  |
| H | -3.40935300 | -0.17171900 | 4.71518300  |
| H | -6.15014400 | -1.93717600 | 1.91023500  |
| H | -5.50913800 | -1.42304500 | 4.25692300  |
| C | -3.07080200 | 1.82464400  | -0.65492400 |
| C | -2.43888000 | 3.07143300  | -0.68415900 |
| C | -4.37800100 | 1.71265900  | -1.14748600 |
| C | -3.09856700 | 4.18404700  | -1.20225700 |
| H | -1.41574600 | 3.15379700  | -0.31577700 |
| C | -5.03231700 | 2.82171700  | -1.67269800 |
| H | -4.89063900 | 0.75057400  | -1.12200100 |
| C | -4.39204100 | 4.05989400  | -1.70175100 |
| H | -2.59585100 | 5.14980100  | -1.21998700 |
| H | -6.04490500 | 2.72057200  | -2.06040100 |
| H | -4.90479400 | 4.92832200  | -2.11258300 |

|    |             |             |             |
|----|-------------|-------------|-------------|
| H  | -3.29750400 | -1.35979900 | -1.41436500 |
| H  | -2.24986000 | -0.28471100 | -2.34424700 |
| Ru | 0.14571900  | 0.41476300  | 0.33747500  |
| H  | -0.10730200 | -0.91486500 | 1.37040200  |
| C  | 1.26806900  | -2.00612600 | -1.33980800 |
| H  | 1.17193500  | -2.68387500 | -0.48038000 |
| H  | 1.29145000  | -2.62287900 | -2.25277000 |
| C  | -1.18925800 | -1.85774000 | -1.33678100 |
| H  | -1.23811000 | -2.55863400 | -2.18661300 |
| H  | -1.23271700 | -2.44270200 | -0.40866500 |
| H  | 0.10390400  | -0.56208700 | -2.20168800 |
| H  | 0.42871100  | 1.66339400  | -0.84129000 |
| C  | -1.11525600 | 1.83926100  | -3.89173100 |
| H  | -1.20348700 | 1.50869200  | -4.93262500 |
| H  | -2.09270800 | 1.68525200  | -3.40141900 |
| H  | -0.90866200 | 2.92093400  | -3.89409900 |
| O  | -0.07149000 | 1.09969100  | -3.30094400 |
| H  | 0.07676800  | 1.45451300  | -2.38870500 |

**TSA4**

| -----                   |             |             |             |
|-------------------------|-------------|-------------|-------------|
| Coordinates (Angstroms) |             |             |             |
|                         | X           | Y           | Z           |
| -----                   |             |             |             |
| N                       | -0.01366900 | -1.07954500 | -1.34918600 |
| C                       | 2.38540800  | -1.44545600 | -1.08407700 |
| H                       | 2.61296000  | -0.87825300 | -1.99593200 |
| H                       | 3.18838300  | -2.17865300 | -0.93519200 |
| C                       | -2.40090200 | -0.61062900 | -1.59926100 |
| C                       | 0.15093300  | 1.64507900  | 1.67825300  |
| O                       | 0.22123200  | 2.38362200  | 2.58454600  |
| P                       | -2.26347100 | 0.37773000  | -0.04987500 |
| P                       | 2.30329800  | -0.21026900 | 0.28115600  |
| C                       | 2.90845900  | -1.05740600 | 1.77982000  |
| C                       | 3.27757900  | -0.28178200 | 2.88690000  |
| C                       | 2.93609300  | -2.45119200 | 1.88987800  |
| C                       | 3.67728700  | -0.88845600 | 4.07195900  |
| H                       | 3.25587800  | 0.80650900  | 2.81715200  |
| C                       | 3.33554300  | -3.05704800 | 3.07904900  |
| H                       | 2.63996900  | -3.07437300 | 1.04677700  |
| C                       | 3.70751900  | -2.27855600 | 4.17115400  |
| H                       | 3.96519600  | -0.27312600 | 4.92252700  |
| H                       | 3.35514400  | -4.14335200 | 3.14969300  |
| H                       | 4.01968400  | -2.75334900 | 5.09975400  |
| C                       | 3.62586900  | 1.00115500  | -0.05960800 |
| C                       | 4.96398700  | 0.60399500  | -0.18620100 |

|    |             |             |             |
|----|-------------|-------------|-------------|
| C  | 3.30130100  | 2.35535300  | -0.17866400 |
| C  | 5.95424300  | 1.54777000  | -0.43550100 |
| H  | 5.23249500  | -0.44783900 | -0.08035400 |
| C  | 4.29560800  | 3.29991800  | -0.42258200 |
| H  | 2.26110600  | 2.66567600  | -0.07709900 |
| C  | 5.62072900  | 2.89706300  | -0.55316600 |
| H  | 6.99130600  | 1.23120200  | -0.53453900 |
| H  | 4.03145000  | 4.35234400  | -0.50994400 |
| H  | 6.39878100  | 3.63460400  | -0.74263500 |
| C  | -3.25231700 | -0.50782500 | 1.20957000  |
| C  | -2.94485100 | -0.28508700 | 2.55832600  |
| C  | -4.30583000 | -1.37283500 | 0.89241900  |
| C  | -3.68093700 | -0.90175100 | 3.56403200  |
| H  | -2.10919700 | 0.36547700  | 2.81652000  |
| C  | -5.03500900 | -1.99957800 | 1.90052300  |
| H  | -4.56245900 | -1.57208400 | -0.14738600 |
| C  | -4.72663700 | -1.76252700 | 3.23707300  |
| H  | -3.42904100 | -0.71712200 | 4.60679900  |
| H  | -5.84694800 | -2.67574500 | 1.63758800  |
| H  | -5.29591900 | -2.25395900 | 4.02410200  |
| C  | -3.24630400 | 1.88192600  | -0.39042500 |
| C  | -2.62236900 | 3.13314000  | -0.38427100 |
| C  | -4.61337600 | 1.80144000  | -0.68593200 |
| C  | -3.35092200 | 4.28416400  | -0.67634600 |
| H  | -1.55915400 | 3.19894700  | -0.15040900 |
| C  | -5.33811200 | 2.95052200  | -0.98091400 |
| H  | -5.11649600 | 0.83370100  | -0.67864800 |
| C  | -4.70692600 | 4.19366400  | -0.97693400 |
| H  | -2.85572800 | 5.25362400  | -0.66776400 |
| H  | -6.39947500 | 2.87741900  | -1.21247400 |
| H  | -5.27596900 | 5.09298800  | -1.20625200 |
| H  | -3.40048200 | -1.03423200 | -1.75830200 |
| H  | -2.22106900 | 0.09249100  | -2.42450700 |
| Ru | 0.05439300  | 0.42895200  | 0.27124600  |
| H  | -0.17261300 | -0.75495000 | 1.33769900  |
| C  | 1.02327800  | -2.10680100 | -1.23292900 |
| H  | 0.80750600  | -2.76293400 | -0.37179100 |
| H  | 1.02319800  | -2.74827300 | -2.13250200 |
| C  | -1.32592700 | -1.68308100 | -1.57862500 |
| H  | -1.32917600 | -2.23783000 | -2.53412400 |
| H  | -1.54557700 | -2.42024700 | -0.78528700 |
| H  | 0.33636000  | -0.32530900 | -2.27411900 |
| H  | 0.21042500  | 1.91641700  | -1.03373000 |
| C  | -0.10644700 | 1.06354800  | -3.89336700 |

|   |             |            |             |
|---|-------------|------------|-------------|
| H | 0.34833700  | 1.62929500 | -4.72784600 |
| H | -0.74045000 | 0.27951900 | -4.36357500 |
| H | -0.81526000 | 1.77282700 | -3.39827800 |
| O | 0.85185800  | 0.55832600 | -3.04250300 |
| H | 0.54397500  | 1.45217900 | -1.62445500 |

**A6**

| -----                          |             |             |             |
|--------------------------------|-------------|-------------|-------------|
| <b>Coordinates (Angstroms)</b> |             |             |             |
|                                | <b>X</b>    | <b>Y</b>    | <b>Z</b>    |
| -----                          |             |             |             |
| N                              | -0.00793600 | -1.02521900 | -1.36058000 |
| C                              | 2.40402400  | -1.35227600 | -1.15354200 |
| H                              | 2.61784000  | -0.75425400 | -2.04900000 |
| H                              | 3.22433000  | -2.07268300 | -1.03736900 |
| C                              | -2.41164300 | -0.66557400 | -1.56756500 |
| C                              | 0.17391700  | 1.76103400  | 1.58579700  |
| O                              | 0.24846300  | 2.49771600  | 2.49497600  |
| P                              | -2.25883500 | 0.38094400  | -0.06159000 |
| P                              | 2.31019100  | -0.16481100 | 0.24774200  |
| C                              | 2.85651900  | -1.07636300 | 1.73258800  |
| C                              | 3.12502900  | -0.34969800 | 2.90077500  |
| C                              | 2.95444100  | -2.47098200 | 1.76561900  |
| C                              | 3.49101100  | -1.00401900 | 4.07121400  |
| H                              | 3.04862100  | 0.73836000  | 2.89053200  |
| C                              | 3.31795200  | -3.12508400 | 2.94127300  |
| H                              | 2.74033500  | -3.05829800 | 0.87379400  |
| C                              | 3.58828200  | -2.39484000 | 4.09451900  |
| H                              | 3.69983300  | -0.42598000 | 4.96979500  |
| H                              | 3.39022600  | -4.21138400 | 2.95192300  |
| H                              | 3.87163700  | -2.90743100 | 5.01208200  |
| C                              | 3.66960600  | 1.02900500  | -0.00543400 |
| C                              | 5.00728100  | 0.60952100  | -0.01462500 |
| C                              | 3.37847500  | 2.38336300  | -0.19198500 |
| C                              | 6.02959500  | 1.52980900  | -0.21776500 |
| H                              | 5.24832700  | -0.44174700 | 0.14704200  |
| C                              | 4.40425300  | 3.30498900  | -0.39119200 |
| H                              | 2.33957000  | 2.71387600  | -0.17303200 |
| C                              | 5.72888600  | 2.87875500  | -0.40609700 |
| H                              | 7.06561800  | 1.19536700  | -0.22590100 |
| H                              | 4.16570900  | 4.35772400  | -0.53157800 |
| H                              | 6.53125200  | 3.59827300  | -0.56006900 |
| C                              | -3.20030400 | -0.46930300 | 1.25701600  |
| C                              | -2.84762600 | -0.21452700 | 2.58853700  |
| C                              | -4.26670100 | -1.33753600 | 0.99581800  |
| C                              | -3.55142500 | -0.80455000 | 3.63310700  |

|    |             |             |             |
|----|-------------|-------------|-------------|
| H  | -2.00336200 | 0.44093000  | 2.80177000  |
| C  | -4.96382900 | -1.93670000 | 2.04243500  |
| H  | -4.55707200 | -1.56178600 | -0.02991200 |
| C  | -4.60983200 | -1.66925600 | 3.36205100  |
| H  | -3.26419000 | -0.59614200 | 4.66210800  |
| H  | -5.78467400 | -2.61746400 | 1.82309300  |
| H  | -5.15423300 | -2.13966000 | 4.17899400  |
| C  | -3.27433800 | 1.85854700  | -0.43082900 |
| C  | -2.68868600 | 3.12767300  | -0.39712300 |
| C  | -4.62717500 | 1.74167300  | -0.77655500 |
| C  | -3.43738600 | 4.26015100  | -0.71073800 |
| H  | -1.63849500 | 3.22323100  | -0.11792500 |
| C  | -5.37289800 | 2.87171800  | -1.09380200 |
| H  | -5.10184400 | 0.75987600  | -0.79220900 |
| C  | -4.77796500 | 4.13272700  | -1.06256900 |
| H  | -2.97049500 | 5.24291700  | -0.67917100 |
| H  | -6.42231600 | 2.76961400  | -1.36504100 |
| H  | -5.36354000 | 5.01667500  | -1.30919700 |
| H  | -3.39950600 | -1.13002100 | -1.67919300 |
| H  | -2.27624000 | 0.01309400  | -2.42108600 |
| Ru | 0.06617900  | 0.50023300  | 0.20258700  |
| H  | -0.13863900 | -0.65501100 | 1.29463900  |
| C  | 1.04501400  | -2.02402200 | -1.29129400 |
| H  | 0.88841300  | -2.73377200 | -0.44966700 |
| H  | 1.04275700  | -2.64265800 | -2.21055700 |
| C  | -1.28825800 | -1.68704000 | -1.53170100 |
| H  | -1.29512300 | -2.26921400 | -2.47464000 |
| H  | -1.48974000 | -2.42340300 | -0.72223000 |
| H  | 0.51313000  | -0.05003500 | -2.72943100 |
| H  | -0.05053200 | 1.96116200  | -1.16293600 |
| C  | -0.21870900 | 1.16320300  | -4.04638000 |
| H  | 0.13903800  | 1.81488400  | -4.85393500 |
| H  | -0.93213900 | 0.44587000  | -4.49573300 |
| H  | -0.79727300 | 1.80189200  | -3.34526100 |
| O  | 0.87967900  | 0.54511600  | -3.45346900 |
| H  | 0.64074000  | 1.64240500  | -1.38492100 |

A7

Coordinates (Angstroms)

|   | X           | Y           | Z           |
|---|-------------|-------------|-------------|
| N | -0.13045600 | -1.06611300 | -1.22238700 |
| C | 2.28901500  | -1.28394000 | -1.18582500 |
| H | 2.38873700  | -0.65361300 | -2.07990600 |
| H | 3.15358800  | -1.95967700 | -1.16448000 |



|   |             |             |             |
|---|-------------|-------------|-------------|
| C | -2.53177700 | -0.75699800 | -1.42248800 |
| C | 0.06069500  | 1.87381300  | 1.52197900  |
| O | 0.10034900  | 2.64757900  | 2.40750600  |
| P | -2.34595100 | 0.39615400  | -0.00320300 |
| P | 2.21941900  | -0.12452600 | 0.23712100  |
| C | 2.79909100  | -1.04658700 | 1.70627100  |
| C | 2.55594600  | -0.47692600 | 2.96394600  |
| C | 3.47311600  | -2.27021100 | 1.63940700  |
| C | 2.99059400  | -1.10761900 | 4.12351800  |
| H | 2.01053000  | 0.46540800  | 3.02940300  |
| C | 3.89602600  | -2.90866300 | 2.80406800  |
| H | 3.66567800  | -2.74221000 | 0.67695200  |
| C | 3.66004300  | -2.32791900 | 4.04635500  |
| H | 2.79722000  | -0.64990100 | 5.09217400  |
| H | 4.41069600  | -3.86586900 | 2.73629400  |
| H | 3.99090200  | -2.82842200 | 4.95490900  |
| C | 3.57096200  | 1.07700300  | -0.04749100 |
| C | 4.90241800  | 0.66450000  | -0.18862800 |
| C | 3.26881000  | 2.43959900  | -0.13192800 |
| C | 5.90674100  | 1.59782000  | -0.42169300 |
| H | 5.15443300  | -0.39379000 | -0.10811300 |
| C | 4.27599800  | 3.37447500  | -0.36106600 |
| H | 2.23472700  | 2.76539700  | -0.00793600 |
| C | 5.59409900  | 2.95447200  | -0.50857700 |
| H | 6.93830300  | 1.26694300  | -0.53159800 |
| H | 4.02861100  | 4.43299500  | -0.41997300 |
| H | 6.38257100  | 3.68396300  | -0.68571700 |
| C | -3.28332500 | -0.33138300 | 1.39049100  |
| C | -2.92007400 | 0.04029800  | 2.69134100  |
| C | -4.36115000 | -1.20664700 | 1.21540400  |
| C | -3.62669700 | -0.43988000 | 3.78870100  |
| H | -2.06928600 | 0.70586400  | 2.83843100  |
| C | -5.06101400 | -1.69622300 | 2.31556800  |
| H | -4.65983900 | -1.51915400 | 0.21531700  |
| C | -4.69759400 | -1.31140300 | 3.60316700  |
| H | -3.33317900 | -0.13952400 | 4.79311100  |
| H | -5.89123400 | -2.38434300 | 2.16404600  |
| H | -5.24543200 | -1.69492600 | 4.46237400  |
| C | -3.34692100 | 1.86361600  | -0.44547500 |
| C | -2.75799200 | 3.13141700  | -0.41981800 |
| C | -4.69365400 | 1.74591300  | -0.81381500 |
| C | -3.49914300 | 4.26186300  | -0.75729500 |
| H | -1.71127900 | 3.22543200  | -0.12538300 |
| C | -5.43153400 | 2.87368400  | -1.15530900 |

|    |             |             |             |
|----|-------------|-------------|-------------|
| H  | -5.17001800 | 0.76466200  | -0.82739900 |
| C  | -4.83497700 | 4.13386900  | -1.12647900 |
| H  | -3.03087100 | 5.24435200  | -0.72871300 |
| H  | -6.47695300 | 2.77120200  | -1.44219800 |
| H  | -5.41507500 | 5.01635500  | -1.39069200 |
| H  | -3.51819500 | -1.23518000 | -1.47362500 |
| H  | -2.41328200 | -0.14512000 | -2.32693600 |
| Ru | -0.02327000 | 0.51977500  | 0.22955500  |
| H  | -0.19757100 | -0.53879300 | 1.40183200  |
| C  | 0.95766500  | -2.01813400 | -1.22929300 |
| H  | 0.91027300  | -2.74200600 | -0.38161900 |
| H  | 0.91788000  | -2.64034600 | -2.14610100 |
| C  | -1.39331200 | -1.76074900 | -1.33247100 |
| H  | -1.40236300 | -2.39875800 | -2.23924000 |
| H  | -1.58542100 | -2.45650300 | -0.48203800 |
| H  | -0.12758300 | 1.98330800  | -1.52231300 |
| H  | 0.62522800  | 1.87618600  | -1.41707600 |

A8

Coordinates (Angstroms)

|   | X           | Y           | Z           |
|---|-------------|-------------|-------------|
| C | 2.58732400  | 1.99406600  | -1.19190900 |
| H | 1.99038700  | 1.94944100  | -2.12711600 |
| H | 3.55267000  | 2.53855600  | -1.19357500 |
| O | 2.17433400  | 1.48230300  | -0.16835400 |
| N | -0.23955300 | 1.17844900  | -2.10351500 |
| C | 0.79362700  | -0.67730900 | -3.28322500 |
| H | 1.70991700  | -0.11254200 | -3.50494700 |
| H | 0.67689100  | -1.44817600 | -4.05618900 |
| C | -1.15990500 | 3.11560700  | -0.95550200 |
| C | 0.36401700  | -0.62254800 | 1.44836900  |
| O | 0.44237300  | -1.18429800 | 2.47949600  |
| P | -1.11423000 | 2.05990100  | 0.55004100  |
| P | 0.99724800  | -1.41044400 | -1.59966600 |
| C | 0.22640700  | -3.06967800 | -1.71618900 |
| C | -0.81867200 | -3.43110000 | -0.86185000 |
| C | 0.67943700  | -3.99428700 | -2.66710300 |
| C | -1.40798300 | -4.69015300 | -0.96512500 |
| H | -1.16955400 | -2.71532300 | -0.11872000 |
| C | 0.09086000  | -5.24908900 | -2.76976900 |
| H | 1.50718300  | -3.73195100 | -3.32787600 |
| C | -0.95693200 | -5.59813800 | -1.91858600 |
| H | -2.22416600 | -4.95958100 | -0.29677000 |
| H | 0.45168600  | -5.95836600 | -3.51293800 |

|    |             |             |             |
|----|-------------|-------------|-------------|
| H  | -1.41911000 | -6.58070700 | -1.99907600 |
| C  | 2.78266100  | -1.80671300 | -1.48716100 |
| C  | 3.59580900  | -1.96964200 | -2.61612600 |
| C  | 3.35655700  | -1.94478400 | -0.21683500 |
| C  | 4.94914000  | -2.26878900 | -2.47716500 |
| H  | 3.17141200  | -1.86411000 | -3.61472600 |
| C  | 4.70698000  | -2.24893100 | -0.07896500 |
| H  | 2.73741900  | -1.79976300 | 0.66924000  |
| C  | 5.50636300  | -2.41009200 | -1.20884800 |
| H  | 5.56923200  | -2.39129400 | -3.36394400 |
| H  | 5.13826700  | -2.35333100 | 0.91509700  |
| H  | 6.56476700  | -2.64165400 | -1.10079800 |
| C  | -2.85734400 | 1.77495700  | 1.03084800  |
| C  | -3.13911000 | 0.65702600  | 1.82718100  |
| C  | -3.90882900 | 2.62235800  | 0.66438300  |
| C  | -4.43620100 | 0.40208900  | 2.25827700  |
| H  | -2.32963800 | -0.02091700 | 2.09974300  |
| C  | -5.21023500 | 2.35931700  | 1.08588500  |
| H  | -3.72111600 | 3.49406600  | 0.03850500  |
| C  | -5.47604600 | 1.25161700  | 1.88579500  |
| H  | -4.63787100 | -0.46933100 | 2.87890700  |
| H  | -6.01942100 | 3.02274900  | 0.78437900  |
| H  | -6.49378900 | 1.04687200  | 2.21389700  |
| C  | -0.49939500 | 3.17276600  | 1.86754400  |
| C  | 0.65397200  | 2.83248600  | 2.58092200  |
| C  | -1.15780600 | 4.37297800  | 2.16472300  |
| C  | 1.14179200  | 3.68050700  | 3.57356800  |
| H  | 1.16712900  | 1.89834100  | 2.34934500  |
| C  | -0.66809800 | 5.21979200  | 3.15222400  |
| H  | -2.06593100 | 4.64268100  | 1.62387300  |
| C  | 0.48302600  | 4.87316700  | 3.85892600  |
| H  | 2.03851700  | 3.40558000  | 4.12646800  |
| H  | -1.18717100 | 6.15073000  | 3.37553300  |
| H  | 0.86488800  | 5.53503400  | 4.63472300  |
| H  | -1.94405700 | 3.88356200  | -0.93377400 |
| H  | -0.19433600 | 3.64073400  | -0.98645100 |
| Ru | 0.09772400  | 0.21808100  | -0.19923600 |
| H  | -1.30474100 | -0.53595900 | -0.33272300 |
| C  | -0.38614900 | 0.28087100  | -3.22965800 |
| H  | -1.33569500 | -0.29996100 | -3.20034000 |
| H  | -0.42285800 | 0.85438900  | -4.17830600 |
| C  | -1.28139500 | 2.18349000  | -2.14874300 |
| H  | -1.20837300 | 2.77423000  | -3.08465700 |
| H  | -2.30602400 | 1.74389800  | -2.16106400 |

## TSA5

| ----- |                         |             |             |
|-------|-------------------------|-------------|-------------|
|       | Coordinates (Angstroms) |             |             |
|       | X                       | Y           | Z           |
| ----- |                         |             |             |
| C     | 2.13720600              | 2.13552400  | -1.43786900 |
| H     | 0.83165900              | 1.77894400  | -2.12963600 |
| H     | 3.09513100              | 2.74035700  | -1.50109500 |
| O     | 2.06593500              | 1.51522200  | -0.36015600 |
| N     | -0.24311100             | 1.18966100  | -2.12447600 |
| C     | 0.90107200              | -0.64340000 | -3.24476900 |
| H     | 1.82007000              | -0.06112200 | -3.39972900 |
| H     | 0.84666600              | -1.39617500 | -4.04155300 |
| C     | -1.20895700             | 3.08874500  | -0.94860400 |
| C     | 0.35509400              | -0.60764900 | 1.46076000  |
| O     | 0.48134300              | -1.13599000 | 2.50297300  |
| P     | -1.14359900             | 2.04176700  | 0.56863700  |
| P     | 1.02778900              | -1.41462700 | -1.56639900 |
| C     | 0.22642100              | -3.05348500 | -1.75454300 |
| C     | -0.81149700             | -3.43755200 | -0.90110000 |
| C     | 0.65271500              | -3.94274000 | -2.75022000 |
| C     | -1.41904300             | -4.68345500 | -1.04841800 |
| H     | -1.14188100             | -2.74859400 | -0.12399000 |
| C     | 0.04427000              | -5.18348200 | -2.89851600 |
| H     | 1.47593700              | -3.66616400 | -3.41061900 |
| C     | -0.99558600             | -5.55507800 | -2.04735500 |
| H     | -2.22836200             | -4.97122500 | -0.37934600 |
| H     | 0.38366200              | -5.86389900 | -3.67795100 |
| H     | -1.47299800             | -6.52675500 | -2.16309500 |
| C     | 2.80251100              | -1.83692000 | -1.42617100 |
| C     | 3.60177200              | -2.08922800 | -2.54842300 |
| C     | 3.37894500              | -1.91463200 | -0.15313200 |
| C     | 4.94465600              | -2.42391400 | -2.39984900 |
| H     | 3.17581600              | -2.01854800 | -3.54935800 |
| C     | 4.72083000              | -2.25243700 | -0.00537600 |
| H     | 2.77236900              | -1.69231900 | 0.72498900  |
| C     | 5.50482000              | -2.50946900 | -1.12757500 |
| H     | 5.55443200              | -2.61711700 | -3.28093800 |
| H     | 5.15729900              | -2.30698800 | 0.99031700  |
| H     | 6.55591700              | -2.76870100 | -1.01158600 |
| C     | -2.88041200             | 1.75822300  | 1.06993000  |
| C     | -3.15364700             | 0.64181500  | 1.87154500  |
| C     | -3.93714400             | 2.60199900  | 0.70905600  |
| C     | -4.44650800             | 0.38598000  | 2.31416100  |
| H     | -2.34165700             | -0.03491100 | 2.13897800  |
| C     | -5.23455400             | 2.33774700  | 1.14216600  |

|    |             |             |             |
|----|-------------|-------------|-------------|
| H  | -3.75734900 | 3.47405800  | 0.08118900  |
| C  | -5.49153200 | 1.23156400  | 1.94681900  |
| H  | -4.64111200 | -0.48426000 | 2.93857700  |
| H  | -6.04735900 | 2.99893800  | 0.84568300  |
| H  | -6.50608000 | 1.02513100  | 2.28339300  |
| C  | -0.50590000 | 3.17943400  | 1.84967400  |
| C  | 0.74092800  | 2.92699200  | 2.43075900  |
| C  | -1.22566600 | 4.31732800  | 2.23501900  |
| C  | 1.26089500  | 3.80471100  | 3.38043500  |
| H  | 1.30226300  | 2.04332000  | 2.12577700  |
| C  | -0.70334000 | 5.19300800  | 3.17994100  |
| H  | -2.20598500 | 4.51375000  | 1.79919300  |
| C  | 0.54138700  | 4.93678100  | 3.75359000  |
| H  | 2.23173600  | 3.60191100  | 3.82928800  |
| H  | -1.26962500 | 6.07578900  | 3.47229500  |
| H  | 0.94883000  | 5.62156700  | 4.49551400  |
| H  | -2.00366600 | 3.84511900  | -0.92588700 |
| H  | -0.25589400 | 3.63653100  | -0.97788500 |
| Ru | 0.07791300  | 0.20599300  | -0.18187000 |
| H  | -1.33258800 | -0.56767500 | -0.30477900 |
| C  | -0.29982700 | 0.28682700  | -3.27495000 |
| H  | -1.24012100 | -0.28832600 | -3.25797500 |
| H  | -0.29709800 | 0.86710700  | -4.21513200 |
| C  | -1.31701700 | 2.18507200  | -2.16429200 |
| H  | -1.24309800 | 2.78662200  | -3.08806700 |
| H  | -2.29835000 | 1.68195500  | -2.19077800 |

A9

| -----                   |             |             |             |
|-------------------------|-------------|-------------|-------------|
| Coordinates (Angstroms) |             |             |             |
|                         | X           | Y           | Z           |
| -----                   |             |             |             |
| C                       | 2.13531200  | 2.19157700  | -1.15369900 |
| H                       | 0.60031500  | 1.67604600  | -2.02145800 |
| H                       | 3.11344800  | 2.77517100  | -1.03233800 |
| O                       | 1.99552300  | 1.44520100  | -0.15453500 |
| N                       | -0.28393700 | 1.06892700  | -2.01538200 |
| C                       | 1.05066000  | -0.66825900 | -3.05853900 |
| H                       | 1.92588600  | -0.00181200 | -3.05025200 |
| H                       | 1.17371500  | -1.34534200 | -3.91265100 |
| C                       | -1.35539400 | 2.89343700  | -0.83013000 |
| C                       | 0.42090700  | -0.71300400 | 1.58123700  |
| O                       | 0.61581300  | -1.23506900 | 2.61500800  |
| P                       | -1.22431200 | 1.86600300  | 0.69895600  |
| P                       | 1.06120400  | -1.53046100 | -1.42425000 |
| C                       | 0.15148100  | -3.09781500 | -1.67576100 |

|   |             |             |             |
|---|-------------|-------------|-------------|
| C | -0.45379500 | -3.69144200 | -0.56025700 |
| C | 0.05568400  | -3.74033000 | -2.91597800 |
| C | -1.12398800 | -4.90431000 | -0.67943900 |
| H | -0.40654900 | -3.18536200 | 0.40400600  |
| C | -0.62598800 | -4.94930300 | -3.03692900 |
| H | 0.51162800  | -3.30030400 | -3.80222200 |
| C | -1.21317900 | -5.53507200 | -1.91882700 |
| H | -1.58627100 | -5.35362800 | 0.19759800  |
| H | -0.69782500 | -5.43331100 | -4.00954300 |
| H | -1.74564600 | -6.47975500 | -2.01431800 |
| C | 2.79771500  | -2.06135600 | -1.20935100 |
| C | 3.37510800  | -3.05994100 | -2.00394700 |
| C | 3.57278800  | -1.43070400 | -0.22951300 |
| C | 4.70806500  | -3.41504700 | -1.82671400 |
| H | 2.77521400  | -3.57234200 | -2.75677000 |
| C | 4.90761500  | -1.78913900 | -0.05465300 |
| H | 3.12418800  | -0.65096300 | 0.38550900  |
| C | 5.47574000  | -2.77913800 | -0.85171600 |
| H | 5.14849900  | -4.19368200 | -2.44735100 |
| H | 5.50304000  | -1.29367400 | 0.71010000  |
| H | 6.51808500  | -3.06078600 | -0.71148900 |
| C | -2.94293800 | 1.50014100  | 1.20850200  |
| C | -3.16182500 | 0.36510200  | 2.00034400  |
| C | -4.03685600 | 2.30258500  | 0.86331000  |
| C | -4.43975700 | 0.05034800  | 2.44940900  |
| H | -2.31944600 | -0.27990800 | 2.25151300  |
| C | -5.31886900 | 1.97903600  | 1.30269400  |
| H | -3.89881300 | 3.18730800  | 0.24252500  |
| C | -5.52220000 | 0.85514800  | 2.09838700  |
| H | -4.59264900 | -0.83384700 | 3.06560800  |
| H | -6.16096500 | 2.60812800  | 1.01880900  |
| H | -6.52456500 | 0.60259300  | 2.43979200  |
| C | -0.62453200 | 3.02707100  | 1.97674400  |
| C | 0.64278600  | 2.81615100  | 2.53078100  |
| C | -1.38751200 | 4.12113600  | 2.40477300  |
| C | 1.14125500  | 3.69109000  | 3.49347200  |
| H | 1.23751700  | 1.96752700  | 2.19349900  |
| C | -0.88638300 | 4.99397200  | 3.36441200  |
| H | -2.38446700 | 4.28429900  | 1.99380400  |
| C | 0.37905700  | 4.77909400  | 3.90969100  |
| H | 2.12785900  | 3.51942000  | 3.92006600  |
| H | -1.48632900 | 5.84158000  | 3.69163800  |
| H | 0.76808900  | 5.46126700  | 4.66379700  |
| H | -2.18054600 | 3.61565900  | -0.80415100 |

|    |             |             |             |
|----|-------------|-------------|-------------|
| H  | -0.42275900 | 3.47462600  | -0.88250000 |
| Ru | 0.08670900  | 0.08593700  | -0.04916700 |
| H  | -1.28895900 | -0.76834100 | -0.16349800 |
| C  | -0.21356200 | 0.16684200  | -3.17355300 |
| H  | -1.11227700 | -0.46670000 | -3.18780700 |
| H  | -0.20375900 | 0.74914500  | -4.11004800 |
| C  | -1.43942100 | 1.97743200  | -2.03983100 |
| H  | -1.43732500 | 2.57132300  | -2.96923800 |
| H  | -2.36375800 | 1.38193100  | -2.02976300 |

**TSA6**

| -----                   |             |             |             |
|-------------------------|-------------|-------------|-------------|
| Coordinates (Angstroms) |             |             |             |
|                         | X           | Y           | Z           |
| -----                   |             |             |             |
| C                       | 1.76220500  | 1.85674100  | -0.35593900 |
| H                       | 0.37284000  | 1.51457900  | -1.96540600 |
| H                       | 2.10963000  | 2.92370500  | -0.02117300 |
| O                       | 2.20332300  | 0.97885100  | 0.42384000  |
| N                       | -0.49114100 | 0.93496700  | -2.06225600 |
| C                       | 0.89294100  | -0.77443200 | -3.10768900 |
| H                       | 1.75231300  | -0.09454300 | -3.19166300 |
| H                       | 0.96070700  | -1.50277900 | -3.92625900 |
| C                       | -1.62361700 | 2.74254000  | -0.88097800 |
| C                       | 0.09256100  | -0.92680800 | 1.56433300  |
| O                       | 0.14452000  | -1.52668800 | 2.57252400  |
| P                       | -1.31906400 | 1.79741700  | 0.68381600  |
| P                       | 1.01136000  | -1.57004100 | -1.44052600 |
| C                       | 0.24848100  | -3.22055300 | -1.67444100 |
| C                       | -0.70321400 | -3.68453100 | -0.76100800 |
| C                       | 0.62211800  | -4.04620100 | -2.74324600 |
| C                       | -1.27442400 | -4.94590300 | -0.91596500 |
| H                       | -0.99599100 | -3.04670700 | 0.07240300  |
| C                       | 0.04691200  | -5.30216800 | -2.90165100 |
| H                       | 1.37636000  | -3.70802300 | -3.45492400 |
| C                       | -0.90385500 | -5.75377600 | -1.98703700 |
| H                       | -2.01271200 | -5.29603300 | -0.19670500 |
| H                       | 0.34311200  | -5.93221300 | -3.73868500 |
| H                       | -1.35275300 | -6.73794700 | -2.11007100 |
| C                       | 2.78649300  | -1.93954300 | -1.24971900 |
| C                       | 3.62117200  | -2.20320200 | -2.34288100 |
| C                       | 3.32363400  | -1.96922200 | 0.04193700  |
| C                       | 4.96641500  | -2.50153700 | -2.14532600 |
| H                       | 3.22377600  | -2.17083800 | -3.35779100 |
| C                       | 4.66701800  | -2.27425200 | 0.23749700  |
| H                       | 2.68656700  | -1.72596700 | 0.89113700  |

|    |             |             |             |
|----|-------------|-------------|-------------|
| C  | 5.48949000  | -2.54058400 | -0.85464800 |
| H  | 5.60788300  | -2.70103800 | -3.00214300 |
| H  | 5.07504700  | -2.29007100 | 1.24638500  |
| H  | 6.54243300  | -2.77096200 | -0.70115700 |
| C  | -2.98802300 | 1.52712700  | 1.38800200  |
| C  | -3.38193500 | 0.24402900  | 1.77920100  |
| C  | -3.87844800 | 2.59503000  | 1.56273900  |
| C  | -4.64446100 | 0.03081100  | 2.32873800  |
| H  | -2.69137900 | -0.58827900 | 1.64644200  |
| C  | -5.13987300 | 2.38094000  | 2.10685100  |
| H  | -3.58034800 | 3.60481500  | 1.27744700  |
| C  | -5.52485100 | 1.09666200  | 2.49037500  |
| H  | -4.93908800 | -0.97282000 | 2.63025300  |
| H  | -5.82405900 | 3.21801400  | 2.23505400  |
| H  | -6.51200200 | 0.92976600  | 2.91797600  |
| C  | -0.55357000 | 3.02726400  | 1.79329600  |
| C  | 0.35365300  | 2.57523700  | 2.75855900  |
| C  | -0.81429400 | 4.39971600  | 1.69191800  |
| C  | 0.97867900  | 3.47744700  | 3.61366800  |
| H  | 0.58859700  | 1.51266600  | 2.81762100  |
| C  | -0.18531400 | 5.30066100  | 2.54616900  |
| H  | -1.50759400 | 4.77221500  | 0.93731400  |
| C  | 0.71092200  | 4.84015500  | 3.50829300  |
| H  | 1.68842400  | 3.11454100  | 4.35462000  |
| H  | -0.39161500 | 6.36588800  | 2.45596000  |
| H  | 1.20798400  | 5.54643000  | 4.17105000  |
| H  | -2.53719200 | 3.34855800  | -0.82763600 |
| H  | -0.77267400 | 3.42676000  | -1.00477400 |
| Ru | -0.05314500 | -0.02225200 | -0.03211700 |
| H  | -1.43805600 | -0.77734900 | -0.31527100 |
| C  | -0.40073300 | 0.01720200  | -3.19826400 |
| H  | -1.27115700 | -0.65462100 | -3.16558500 |
| H  | -0.44701500 | 0.56677100  | -4.15308800 |
| C  | -1.68543800 | 1.78231900  | -2.05705400 |
| H  | -1.77303300 | 2.34440100  | -3.00182700 |
| H  | -2.56681600 | 1.12879300  | -1.98227500 |

**A10**

| -----                   |            |            |             |
|-------------------------|------------|------------|-------------|
| Coordinates (Angstroms) |            |            |             |
|                         | X          | Y          | Z           |
| -----                   |            |            |             |
| C                       | 2.98293900 | 2.15974500 | -0.68448100 |
| H                       | 3.15283300 | 2.73448200 | -1.68396200 |
| H                       | 1.66156700 | 2.73015600 | -2.84857800 |
| O                       | 3.90033800 | 2.24758100 | 0.11287800  |



|   |             |             |             |
|---|-------------|-------------|-------------|
| N | 0.79674400  | 2.19339700  | -2.69817700 |
| C | 1.85713200  | 0.27210600  | -3.77656600 |
| H | 2.78486300  | 0.83162400  | -3.96699300 |
| H | 1.76419000  | -0.48588400 | -4.56474000 |
| C | -0.18251100 | 4.04271200  | -1.43036000 |
| C | 1.39938800  | 0.34812000  | 0.91868100  |
| O | 1.57807400  | -0.15616600 | 1.96335600  |
| P | -0.08844400 | 2.98740500  | 0.08368300  |
| P | 2.01546300  | -0.49511800 | -2.09249400 |
| C | 1.20323500  | -2.13168500 | -2.25398700 |
| C | 0.13192900  | -2.47340000 | -1.42454100 |
| C | 1.65886200  | -3.06104800 | -3.19910600 |
| C | -0.47815100 | -3.72087400 | -1.54485100 |
| H | -0.22564300 | -1.74463700 | -0.69716200 |
| C | 1.04503600  | -4.30203100 | -3.32195000 |
| H | 2.50802200  | -2.81730300 | -3.83894800 |
| C | -0.02612600 | -4.63376600 | -2.49332300 |
| H | -1.31225700 | -3.97712200 | -0.89373900 |
| H | 1.40663300  | -5.01471400 | -4.06143400 |
| H | -0.50534800 | -5.60697200 | -2.58727700 |
| C | 3.78896800  | -0.92689300 | -1.99066300 |
| C | 4.57229800  | -1.19449800 | -3.12096800 |
| C | 4.38423000  | -0.98289500 | -0.72485400 |
| C | 5.91887500  | -1.52110200 | -2.98692800 |
| H | 4.13214700  | -1.14109500 | -4.11720200 |
| C | 5.72832800  | -1.31654600 | -0.59206100 |
| H | 3.79538800  | -0.73546200 | 0.15787300  |
| C | 6.49697600  | -1.58721800 | -1.72151300 |
| H | 6.51730900  | -1.72406600 | -3.87364700 |
| H | 6.17912800  | -1.35140700 | 0.39802200  |
| H | 7.55090900  | -1.83970100 | -1.61689800 |
| C | -1.81527000 | 2.70899900  | 0.61525100  |
| C | -2.01775400 | 1.87855700  | 1.72640800  |
| C | -2.92779500 | 3.26216200  | -0.02450700 |
| C | -3.30031700 | 1.62185800  | 2.19338900  |
| H | -1.15950100 | 1.42316700  | 2.22281700  |
| C | -4.21550000 | 2.99531700  | 0.43920100  |
| H | -2.80384600 | 3.90453300  | -0.89573600 |
| C | -4.40456800 | 2.17971600  | 1.54965800  |
| H | -3.43985300 | 0.97756800  | 3.05976600  |
| H | -5.07235900 | 3.43180400  | -0.07187900 |
| H | -5.41032900 | 1.97444600  | 1.91233600  |
| C | 0.52537000  | 4.12040100  | 1.37876000  |
| C | 1.71703200  | 3.82695700  | 2.04857700  |

|    |             |            |             |
|----|-------------|------------|-------------|
| C  | -0.18929300 | 5.27807500 | 1.71564100  |
| C  | 2.19167300  | 4.68984700 | 3.03538300  |
| H  | 2.27815300  | 2.93148100 | 1.78307500  |
| C  | 0.29105400  | 6.13870700 | 2.69548300  |
| H  | -1.13279200 | 5.49921000 | 1.21393700  |
| C  | 1.48314100  | 5.84388400 | 3.35690600  |
| H  | 3.12062000  | 4.45581200 | 3.55257800  |
| H  | -0.26782400 | 7.03788600 | 2.95011500  |
| H  | 1.85751500  | 6.51655300 | 4.12708100  |
| H  | -0.97753000 | 4.79787600 | -1.38754100 |
| H  | 0.76806900  | 4.59434900 | -1.47391200 |
| Ru | 1.12607200  | 1.16369700 | -0.70943500 |
| H  | -0.44169200 | 0.46667400 | -1.03543500 |
| C  | 0.67152900  | 1.21850800 | -3.79973600 |
| H  | -0.26769000 | 0.67481000 | -3.64069700 |
| H  | 0.60523100  | 1.73757300 | -4.76950900 |
| C  | -0.32414200 | 3.15515800 | -2.65346700 |
| H  | -0.35222800 | 3.75573300 | -3.57665900 |
| H  | -1.24927200 | 2.56641100 | -2.60607900 |

**A11**

| -----                   |             |             |             |
|-------------------------|-------------|-------------|-------------|
| Coordinates (Angstroms) |             |             |             |
|                         | X           | Y           | Z           |
| -----                   |             |             |             |
| C                       | 1.81368900  | 0.70574100  | 0.82427900  |
| H                       | 2.76407800  | 1.29628000  | 0.90435500  |
| H                       | 0.39444700  | 1.66927300  | -2.18347200 |
| O                       | 1.55658200  | -0.07143800 | 1.76544700  |
| N                       | -0.38142900 | 1.03510900  | -1.98412500 |
| C                       | 0.84420100  | -0.76205500 | -3.09483500 |
| H                       | 1.69355200  | -0.09577800 | -3.30365500 |
| H                       | 0.81810700  | -1.52303200 | -3.88527000 |
| C                       | -1.51829600 | 2.83066700  | -0.77847100 |
| P                       | -1.16761100 | 1.86179700  | 0.76614500  |
| P                       | 1.07998600  | -1.49456500 | -1.40344400 |
| C                       | 0.38965600  | -3.19328400 | -1.60726500 |
| C                       | -0.68251100 | -3.61735800 | -0.81910900 |
| C                       | 0.92984300  | -4.07783300 | -2.55096600 |
| C                       | -1.21075300 | -4.89786100 | -0.97592400 |
| H                       | -1.10105100 | -2.92078700 | -0.09263900 |
| C                       | 0.39786300  | -5.35243200 | -2.71362000 |
| H                       | 1.78144400  | -3.76904600 | -3.15967200 |
| C                       | -0.67513000 | -5.76514700 | -1.92379100 |
| H                       | -2.04527900 | -5.21694200 | -0.35331900 |
| H                       | 0.82379900  | -6.02844700 | -3.45364600 |

|    |             |             |             |
|----|-------------|-------------|-------------|
| H  | -1.08938900 | -6.76473800 | -2.04667900 |
| C  | 2.87817300  | -1.86298700 | -1.35673100 |
| C  | 3.70406300  | -1.86962100 | -2.48810500 |
| C  | 3.45077400  | -2.13933300 | -0.10655600 |
| C  | 5.06564100  | -2.14326500 | -2.37319500 |
| H  | 3.28642300  | -1.66533200 | -3.47394400 |
| C  | 4.80905300  | -2.41830400 | 0.00633700  |
| H  | 2.82386700  | -2.12464400 | 0.78438000  |
| C  | 5.62111400  | -2.41827600 | -1.12645400 |
| H  | 5.69308100  | -2.14359200 | -3.26342200 |
| H  | 5.23637100  | -2.63097400 | 0.98492600  |
| H  | 6.68501300  | -2.63154500 | -1.03746600 |
| C  | -2.84968300 | 1.63665300  | 1.48898800  |
| C  | -3.37916300 | 0.35503300  | 1.65634600  |
| C  | -3.61538600 | 2.74440100  | 1.87941600  |
| C  | -4.65267900 | 0.18238900  | 2.19644200  |
| H  | -2.77803800 | -0.49948400 | 1.34434300  |
| C  | -4.88898500 | 2.57245700  | 2.41089900  |
| H  | -3.20669700 | 3.75108500  | 1.77666900  |
| C  | -5.40986300 | 1.28849600  | 2.57142300  |
| H  | -5.05276800 | -0.82235100 | 2.32443400  |
| H  | -5.47511400 | 3.44121700  | 2.70722400  |
| H  | -6.40470600 | 1.15358200  | 2.99334800  |
| C  | -0.46999100 | 3.11065500  | 1.91366900  |
| C  | 0.08645500  | 2.64045300  | 3.11266300  |
| C  | -0.43567300 | 4.48577500  | 1.65234300  |
| C  | 0.65731200  | 3.52210500  | 4.02423900  |
| H  | 0.07634700  | 1.57146000  | 3.32425400  |
| C  | 0.14154500  | 5.36788500  | 2.56430000  |
| H  | -0.86880600 | 4.88178100  | 0.73411000  |
| C  | 0.68899000  | 4.88875800  | 3.75113700  |
| H  | 1.08447800  | 3.13950600  | 4.94977400  |
| H  | 0.15925700  | 6.43471700  | 2.34579000  |
| H  | 1.14059100  | 5.57845900  | 4.46215700  |
| H  | -2.43033600 | 3.43616700  | -0.70201100 |
| H  | -0.67794400 | 3.51697500  | -0.95534800 |
| Ru | 0.11917300  | 0.11817700  | -0.04589600 |
| H  | -1.37559300 | -0.76067700 | -0.24374800 |
| C  | -0.43907700 | 0.03983900  | -3.07504400 |
| H  | -1.30182500 | -0.60544100 | -2.86330900 |
| H  | -0.61296100 | 0.54564000  | -4.03867700 |
| C  | -1.61682100 | 1.84355900  | -1.92201500 |
| H  | -1.78106100 | 2.35592900  | -2.88386500 |
| H  | -2.44364900 | 1.13919600  | -1.76233000 |

## TSA7

| ----- |                         |             |             |
|-------|-------------------------|-------------|-------------|
|       | Coordinates (Angstroms) |             |             |
|       | X                       | Y           | Z           |
| ----- |                         |             |             |
| C     | 2.22027000              | 0.88167400  | 0.86735200  |
| H     | 3.19470600              | 1.30696600  | 1.25936400  |
| H     | 1.36595300              | 2.66191900  | -2.78394100 |
| O     | 1.65208800              | 0.03360000  | 1.56457200  |
| N     | 0.55371400              | 2.05279800  | -2.66681400 |
| C     | 1.83594100              | 0.31052600  | -3.80273100 |
| H     | 2.68093900              | 0.97996600  | -4.01870800 |
| H     | 1.81842700              | -0.45599100 | -4.58795600 |
| C     | -0.52766500             | 3.89307600  | -1.47851400 |
| P     | -0.14471400             | 2.93535400  | 0.06999000  |
| P     | 2.09387900              | -0.40997500 | -2.10616500 |
| C     | 1.42047400              | -2.11948800 | -2.26689600 |
| C     | 0.35590700              | -2.51107700 | -1.44926600 |
| C     | 1.94571900              | -3.03935400 | -3.18381300 |
| C     | -0.17908900             | -3.79379300 | -1.55109300 |
| H     | -0.04920500             | -1.79354100 | -0.73433100 |
| C     | 1.40590300              | -4.31693300 | -3.29282900 |
| H     | 2.79264200              | -2.75631000 | -3.81142600 |
| C     | 0.34161900              | -4.69608800 | -2.47506900 |
| H     | -1.00473100             | -4.08843000 | -0.90521300 |
| H     | 1.81988800              | -5.02204900 | -4.01225500 |
| H     | -0.07713600             | -5.69803300 | -2.55612800 |
| C     | 3.89738700              | -0.76030800 | -2.08384200 |
| C     | 4.72014900              | -0.73846200 | -3.21762300 |
| C     | 4.47798700              | -1.05769900 | -0.84233200 |
| C     | 6.08496900              | -1.00048700 | -3.11102500 |
| H     | 4.29859800              | -0.52201900 | -4.19908300 |
| C     | 5.83723400              | -1.33068000 | -0.73775800 |
| H     | 3.85122300              | -1.07446900 | 0.05049200  |
| C     | 6.64695600              | -1.29729400 | -1.87244000 |
| H     | 6.70989800              | -0.97608300 | -4.00275600 |
| H     | 6.26795900              | -1.56329400 | 0.23478300  |
| H     | 7.71308700              | -1.50175100 | -1.79050800 |
| C     | -1.80597500             | 2.69719700  | 0.83510500  |
| C     | -2.28874100             | 1.39896200  | 1.02520400  |
| C     | -2.59985200             | 3.78133900  | 1.23205000  |
| C     | -3.54250500             | 1.18689200  | 1.59524500  |
| H     | -1.66695700             | 0.55748300  | 0.71648300  |
| C     | -3.85579900             | 3.57076400  | 1.79212100  |
| H     | -2.22583600             | 4.79972800  | 1.11265000  |
| C     | -4.32851800             | 2.27152400  | 1.97557500  |

|    |             |            |             |
|----|-------------|------------|-------------|
| H  | -3.90404400 | 0.17059100 | 1.74397000  |
| H  | -4.46543600 | 4.42131400 | 2.09392300  |
| H  | -5.30846800 | 2.10695400 | 2.42102100  |
| C  | 0.55729700  | 4.21370900 | 1.18533600  |
| C  | 1.15008800  | 3.76736000 | 2.37610600  |
| C  | 0.55426600  | 5.58819800 | 0.91542600  |
| C  | 1.71638000  | 4.66728400 | 3.27162300  |
| H  | 1.16547000  | 2.69931300 | 2.59895400  |
| C  | 1.13338300  | 6.48918100 | 1.80761700  |
| H  | 0.09112400  | 5.96936500 | 0.00563800  |
| C  | 1.71463200  | 6.03239700 | 2.98709200  |
| H  | 2.16768900  | 4.30088100 | 4.19226200  |
| H  | 1.12451700  | 7.55426500 | 1.57990200  |
| H  | 2.16654000  | 6.73723200 | 3.68283600  |
| H  | -1.43888500 | 4.49756400 | -1.38627000 |
| H  | 0.30598100  | 4.58491200 | -1.66531200 |
| Ru | 0.96655500  | 1.08958500 | -0.75946900 |
| H  | -0.48069400 | 0.44562900 | -1.26528200 |
| C  | 0.54710300  | 1.10677900 | -3.80539500 |
| H  | -0.32544700 | 0.45625100 | -3.67228200 |
| H  | 0.42716500  | 1.66397500 | -4.74874900 |
| C  | -0.64436400 | 2.92127800 | -2.63484500 |
| H  | -0.73942600 | 3.45522900 | -3.59440500 |
| H  | -1.51224300 | 2.26139300 | -2.51745200 |

**TSA8**

**Coordinates (Angstroms)**

|   | <b>X</b>    | <b>Y</b>    | <b>Z</b>    |
|---|-------------|-------------|-------------|
| C | 2.87482800  | 2.23041000  | -0.57290300 |
| H | 2.68521400  | 3.29056200  | -2.43533900 |
| H | 1.65926500  | 2.75592900  | -2.66282800 |
| O | 3.87605300  | 2.58582300  | -0.09803100 |
| N | 0.68776500  | 2.09633600  | -2.63446300 |
| C | 1.95003200  | 0.33893700  | -3.75782200 |
| H | 2.83219200  | 0.98568900  | -3.85972700 |
| H | 1.95928600  | -0.38618700 | -4.58130700 |
| C | -0.42297900 | 3.92807500  | -1.47026700 |
| C | 1.34814600  | 0.27007800  | 0.92880000  |
| O | 1.42478100  | -0.31719800 | 1.93744900  |
| P | -0.18339600 | 2.94653500  | 0.06991500  |
| P | 2.08153300  | -0.46807700 | -2.10683500 |
| C | 1.26856000  | -2.09891000 | -2.28638000 |
| C | 0.34718000  | -2.53784200 | -1.33140900 |
| C | 1.59141500  | -2.94149500 | -3.35866700 |

|    |             |             |             |
|----|-------------|-------------|-------------|
| C  | -0.24688800 | -3.79241400 | -1.44966400 |
| H  | 0.09004400  | -1.88417400 | -0.49902700 |
| C  | 0.99057600  | -4.18943800 | -3.48110600 |
| H  | 2.32347900  | -2.62370700 | -4.10215400 |
| C  | 0.06967200  | -4.61678100 | -2.52549500 |
| H  | -0.96233100 | -4.12362900 | -0.69914300 |
| H  | 1.24421500  | -4.83138200 | -4.32293200 |
| H  | -0.39890200 | -5.59476300 | -2.62093200 |
| C  | 3.84834100  | -0.90110600 | -1.94905000 |
| C  | 4.65456100  | -1.14433400 | -3.06805300 |
| C  | 4.40943900  | -1.00728100 | -0.67140900 |
| C  | 5.99327300  | -1.49074400 | -2.90962500 |
| H  | 4.23978700  | -1.05716800 | -4.07220000 |
| C  | 5.74657700  | -1.35882100 | -0.51458800 |
| H  | 3.79575000  | -0.80025200 | 0.20557200  |
| C  | 6.54016800  | -1.60086600 | -1.63330900 |
| H  | 6.61146200  | -1.67077800 | -3.78737200 |
| H  | 6.17129000  | -1.43317900 | 0.48465100  |
| H  | 7.58832100  | -1.86802800 | -1.51133000 |
| C  | -1.86487100 | 2.61869900  | 0.71584900  |
| C  | -2.22615500 | 1.33234700  | 1.12637200  |
| C  | -2.79352700 | 3.66034700  | 0.84310700  |
| C  | -3.49565000 | 1.08940500  | 1.64586100  |
| H  | -1.50816600 | 0.51955000  | 1.02565300  |
| C  | -4.06348300 | 3.41503800  | 1.35324500  |
| H  | -2.52000900 | 4.67383400  | 0.54697700  |
| C  | -4.41621400 | 2.12755800  | 1.75592100  |
| H  | -3.76543100 | 0.08335400  | 1.96205600  |
| H  | -4.77930700 | 4.23062700  | 1.43995000  |
| H  | -5.40998600 | 1.93597400  | 2.15693500  |
| C  | 0.49811400  | 4.14192300  | 1.26971600  |
| C  | 1.30527500  | 3.67423000  | 2.31291800  |
| C  | 0.22313600  | 5.51262100  | 1.18433500  |
| C  | 1.81769600  | 4.55698400  | 3.25862000  |
| H  | 1.54453200  | 2.61231100  | 2.37528200  |
| C  | 0.74153600  | 6.39481000  | 2.12771200  |
| H  | -0.39300400 | 5.89882400  | 0.37247200  |
| C  | 1.53662000  | 5.91809600  | 3.16737500  |
| H  | 2.44727300  | 4.18045100  | 4.06254000  |
| H  | 0.52638600  | 7.45891100  | 2.04729000  |
| H  | 1.94393400  | 6.60980900  | 3.90253200  |
| H  | -1.31325900 | 4.56805100  | -1.42601200 |
| H  | 0.45942700  | 4.57522600  | -1.56751000 |
| Ru | 1.12474900  | 1.15423300  | -0.70044800 |

|   |             |            |             |
|---|-------------|------------|-------------|
| H | -0.31373700 | 0.33641300 | -0.91890600 |
| C | 0.69437100  | 1.19049300 | -3.78857300 |
| H | -0.20976000 | 0.56192200 | -3.77073300 |
| H | 0.66424900  | 1.77683000 | -4.72213700 |
| C | -0.48461400 | 2.97861700 | -2.65233200 |
| H | -0.50224200 | 3.55452700 | -3.59286900 |
| H | -1.40383600 | 2.37287500 | -2.62531500 |

**A12**

**Coordinates (Angstroms)**

|   | <b>X</b>    | <b>Y</b>    | <b>Z</b>    |
|---|-------------|-------------|-------------|
| C | 2.80298300  | 2.03779300  | -0.40049600 |
| O | 3.81752400  | 2.57340400  | -0.23404700 |
| N | 0.72109300  | 2.20432600  | -2.55959000 |
| C | 1.85439500  | 0.44248300  | -3.79349400 |
| H | 2.73926200  | 1.08437000  | -3.90063200 |
| H | 1.81787000  | -0.24988800 | -4.64431500 |
| C | -0.42407200 | 3.94456700  | -1.30177700 |
| C | 1.16550100  | 0.03921600  | 0.88019600  |
| O | 1.13017600  | -0.66793900 | 1.80779600  |
| P | -0.19006200 | 2.89484200  | 0.19422800  |
| P | 2.01320400  | -0.43532300 | -2.18832400 |
| C | 1.21274200  | -2.06448500 | -2.42744200 |
| C | 0.15284900  | -2.47314100 | -1.61384900 |
| C | 1.67496400  | -2.92766500 | -3.43074000 |
| C | -0.44118700 | -3.71909200 | -1.80570800 |
| H | -0.21110700 | -1.80314800 | -0.83646800 |
| C | 1.07715300  | -4.16741400 | -3.62507300 |
| H | 2.51467000  | -2.63018800 | -4.06045100 |
| C | 0.01657100  | -4.56501100 | -2.81142900 |
| H | -1.26616400 | -4.02647200 | -1.16549400 |
| H | 1.44118800  | -4.82721900 | -4.41077200 |
| H | -0.45053800 | -5.53683900 | -2.96194000 |
| C | 3.78033700  | -0.86756700 | -2.03264900 |
| C | 4.62800800  | -0.95006200 | -3.14412800 |
| C | 4.30260300  | -1.12877400 | -0.75973000 |
| C | 5.96862900  | -1.29207900 | -2.98410900 |
| H | 4.24317800  | -0.74074200 | -4.14211200 |
| C | 5.64002600  | -1.47698800 | -0.60247000 |
| H | 3.65416800  | -1.04910100 | 0.11387100  |
| C | 6.47566300  | -1.55770400 | -1.71468700 |
| H | 6.61921200  | -1.34756700 | -3.85518000 |
| H | 6.03263400  | -1.67690500 | 0.39280800  |
| H | 7.52422600  | -1.82257800 | -1.59131100 |

|    |             |            |             |
|----|-------------|------------|-------------|
| C  | -1.87987000 | 2.59409100 | 0.83582200  |
| C  | -2.38983100 | 3.29267800 | 1.93761100  |
| C  | -2.70645500 | 1.67473800 | 0.17627000  |
| C  | -3.69875900 | 3.08022500 | 2.36367400  |
| H  | -1.76306000 | 4.00492100 | 2.47177300  |
| C  | -4.01742700 | 1.47552200 | 0.59643300  |
| H  | -2.30768500 | 1.10522900 | -0.66299800 |
| C  | -4.51696600 | 2.17621700 | 1.69234600  |
| H  | -4.07769600 | 3.62515100 | 3.22672900  |
| H  | -4.64770400 | 0.76047800 | 0.07039600  |
| H  | -5.54005800 | 2.01180800 | 2.02624700  |
| C  | 0.57261900  | 3.98439000 | 1.44072700  |
| C  | 1.39718300  | 3.43067200 | 2.42712200  |
| C  | 0.35121000  | 5.36787100 | 1.43800500  |
| C  | 1.98548500  | 4.24156100 | 3.39314200  |
| H  | 1.58552400  | 2.35648000 | 2.42977600  |
| C  | 0.94605500  | 6.17870000 | 2.40071300  |
| H  | -0.29302200 | 5.81451100 | 0.68071100  |
| C  | 1.76241000  | 5.61647400 | 3.37975100  |
| H  | 2.62626100  | 3.79860500 | 4.15326900  |
| H  | 0.77096300  | 7.25302200 | 2.38530100  |
| H  | 2.22890000  | 6.25171300 | 4.13061900  |
| H  | -1.31482700 | 4.58018600 | -1.22345000 |
| H  | 0.46204700  | 4.58930800 | -1.37946700 |
| Ru | 1.09315800  | 1.11694000 | -0.68137500 |
| H  | -0.37265300 | 0.39439000 | -1.05563500 |
| C  | 0.61292600  | 1.31094900 | -3.68905600 |
| H  | -0.28922500 | 0.65263600 | -3.63530200 |
| H  | 0.50174800  | 1.89341800 | -4.62534800 |
| C  | -0.47547500 | 3.00918800 | -2.49570000 |
| H  | -0.57703800 | 3.61344200 | -3.41961800 |
| H  | -1.40844800 | 2.39583000 | -2.43891300 |

**B1**

**Coordinates (Angstroms)**

|    | <b>X</b>    | <b>Y</b>    | <b>Z</b>    |
|----|-------------|-------------|-------------|
| Ru | 0.03376600  | 0.19271200  | 0.05726800  |
| P  | -2.27047500 | 0.34834600  | 0.42009800  |
| C  | 0.05358800  | 0.31304500  | -1.78252100 |
| H  | 0.07570900  | 1.80735500  | 0.14935600  |
| O  | 0.15578000  | -2.13114400 | 0.14684400  |
| P  | 2.34380900  | 0.08642400  | 0.42131900  |
| N  | 0.00312700  | 0.26135000  | 2.30246300  |
| O  | 0.07697900  | 0.43044000  | -2.94994200 |



|   |             |             |             |
|---|-------------|-------------|-------------|
| C | 0.28292800  | -2.81273000 | -1.07645200 |
| C | -0.83039000 | -2.88006200 | 1.09597100  |
| C | 2.40188400  | -0.17725200 | 2.25268400  |
| C | -1.11510900 | 1.07644600  | 2.80457900  |
| H | -0.23222600 | -0.74499200 | 2.46530000  |
| C | 1.29166600  | 0.63090600  | 2.89744700  |
| C | -2.43003200 | 0.55316600  | 2.25127200  |
| H | 1.10278700  | -2.37200500 | -1.65614300 |
| H | -0.64491200 | -2.76088400 | -1.67418600 |
| O | -1.20472800 | -2.12479900 | 2.06678500  |
| H | -0.19894700 | -3.77730600 | 1.34862000  |
| H | 1.44757700  | 1.70695800  | 2.72942400  |
| H | 1.27856900  | 0.46732900  | 3.98743000  |
| C | -4.59144500 | 3.96230200  | -1.32731100 |
| C | -5.24610900 | 3.03274500  | -0.51923800 |
| C | -4.54770000 | 1.94790700  | -0.00177800 |
| C | -3.18256200 | 1.78166300  | -0.27603300 |
| C | -2.53724400 | 2.71634000  | -1.09008300 |
| C | -3.23953300 | 3.80048600  | -1.61438900 |
| H | -5.13965100 | 4.80941600  | -1.73636000 |
| H | -6.30535000 | 3.15145400  | -0.29688100 |
| H | -5.06942300 | 1.21440900  | 0.61504400  |
| H | -1.47744500 | 2.58882000  | -1.30737500 |
| H | -2.72591600 | 4.51987200  | -2.25006400 |
| C | -4.87763900 | -3.20289700 | -0.98241400 |
| C | -4.10612400 | -2.46730900 | -1.87966000 |
| C | -3.34086200 | -1.39891900 | -1.42346100 |
| C | -3.34289700 | -1.04478200 | -0.06724700 |
| C | -4.12212000 | -1.78679600 | 0.82492100  |
| C | -4.88411300 | -2.85898900 | 0.36715800  |
| H | -5.47115400 | -4.04508000 | -1.33412500 |
| H | -4.09092400 | -2.73071300 | -2.93589100 |
| H | -2.72800000 | -0.83341600 | -2.12786100 |
| H | -4.12987100 | -1.54310400 | 1.88463600  |
| H | -5.48287700 | -3.43168300 | 1.07350600  |
| C | 4.62167400  | -3.41014300 | -1.57151700 |
| C | 4.65149700  | -2.13421000 | -2.13030800 |
| C | 4.00690500  | -1.07786400 | -1.49441100 |
| C | 3.32211900  | -1.28132500 | -0.28767100 |
| C | 3.28947900  | -2.57045100 | 0.26014200  |
| C | 3.94040300  | -3.62360300 | -0.37574000 |
| H | 5.12454300  | -4.23723400 | -2.06945800 |
| H | 5.17883500  | -1.95829700 | -3.06629300 |
| H | 4.03522700  | -0.08356900 | -1.94061900 |

|   |             |             |             |
|---|-------------|-------------|-------------|
| H | 2.73059700  | -2.76836000 | 1.17222500  |
| H | 3.90649400  | -4.61876900 | 0.06459800  |
| C | 5.03240100  | 3.78000800  | -0.29771800 |
| C | 3.71964700  | 3.77193300  | -0.76014200 |
| C | 2.90830700  | 2.65983700  | -0.54159300 |
| C | 3.40691200  | 1.54558800  | 0.13946600  |
| C | 4.73429200  | 1.55794500  | 0.59142700  |
| C | 5.54051800  | 2.67005300  | 0.37737000  |
| H | 5.66483800  | 4.64992800  | -0.46621100 |
| H | 3.32261600  | 4.63370400  | -1.29359100 |
| H | 1.87812700  | 2.64588400  | -0.89727000 |
| H | 5.14102000  | 0.68449900  | 1.10288600  |
| H | 6.56879300  | 2.67144000  | 0.73463900  |
| H | -0.93947400 | 2.11580200  | 2.49314700  |
| H | -1.13683000 | 1.05731300  | 3.90705500  |
| H | -3.25895000 | 1.22194200  | 2.51256600  |
| H | -2.61878600 | -0.44109600 | 2.66572700  |
| H | 2.22943000  | -1.24424700 | 2.44645500  |
| H | 3.38396700  | 0.07885000  | 2.67037700  |
| H | 0.51874100  | -3.87662000 | -0.90043600 |
| H | -1.63102700 | -3.22214500 | 0.38549200  |

**B2**

| -----                   |             |             |             |
|-------------------------|-------------|-------------|-------------|
| Coordinates (Angstroms) |             |             |             |
|                         | X           | Y           | Z           |
| -----                   |             |             |             |
| N                       | 1.64449700  | 0.40295700  | -1.52398900 |
| C                       | 3.22408100  | -0.85234500 | -0.15275300 |
| H                       | 3.68105900  | 0.06159300  | 0.24710900  |
| H                       | 3.98303100  | -1.64459300 | -0.12907600 |
| C                       | 0.07940500  | 1.72596600  | -2.83705000 |
| C                       | -1.33901900 | -0.61617100 | 1.01809900  |
| O                       | -2.22263300 | -1.02980400 | 1.67428300  |
| P                       | -1.20584200 | 1.12944000  | -1.65691900 |
| P                       | 1.77404600  | -1.27192600 | 0.91088800  |
| C                       | 1.72882900  | -3.09773600 | 0.95184500  |
| C                       | 2.87188100  | -3.82992400 | 1.30340200  |
| C                       | 0.54914700  | -3.78348900 | 0.64840800  |
| C                       | 2.83582200  | -5.21932300 | 1.33952100  |
| H                       | 3.79332400  | -3.30601200 | 1.56066300  |
| C                       | 0.51256100  | -5.17603600 | 0.69033600  |
| H                       | -0.33999000 | -3.21533300 | 0.37643900  |
| C                       | 1.65474000  | -5.89442100 | 1.03176900  |
| H                       | 3.73034700  | -5.77818000 | 1.60941400  |
| H                       | -0.41210200 | -5.69965300 | 0.45386500  |

|    |             |             |             |
|----|-------------|-------------|-------------|
| H  | 1.62686400  | -6.98244700 | 1.06065300  |
| C  | 2.24763700  | -0.81419800 | 2.61451200  |
| C  | 2.86770500  | 0.41958400  | 2.86179500  |
| C  | 1.87696700  | -1.61613600 | 3.70206700  |
| C  | 3.13168700  | 0.82318900  | 4.16692100  |
| H  | 3.11419300  | 1.08105000  | 2.03191800  |
| C  | 2.13730300  | -1.20443700 | 5.00628800  |
| H  | 1.38305300  | -2.57211300 | 3.52882400  |
| C  | 2.76932200  | 0.01389200  | 5.24228600  |
| H  | 3.62151300  | 1.77968600  | 4.34402500  |
| H  | 1.84666100  | -1.84147100 | 5.84013400  |
| H  | 2.97596100  | 0.33401800  | 6.26225500  |
| C  | -2.43569900 | 0.25116400  | -2.69385200 |
| C  | -2.84195900 | -1.04509500 | -2.36530500 |
| C  | -3.00962600 | 0.88455100  | -3.80472800 |
| C  | -3.79704100 | -1.70132200 | -3.13933600 |
| H  | -2.40112300 | -1.53612400 | -1.49824100 |
| C  | -3.95708700 | 0.22618600  | -4.58060900 |
| H  | -2.71868100 | 1.90518500  | -4.05852800 |
| C  | -4.35166900 | -1.06974800 | -4.24862900 |
| H  | -4.10621700 | -2.71058000 | -2.87290600 |
| H  | -4.39298000 | 0.72576700  | -5.44420300 |
| H  | -5.09557900 | -1.58425400 | -4.85463300 |
| C  | -2.15475400 | 2.60449800  | -1.13716400 |
| C  | -1.88655600 | 3.90119000  | -1.58949500 |
| C  | -3.17967100 | 2.41442600  | -0.19795800 |
| C  | -2.62308900 | 4.98324700  | -1.10955700 |
| H  | -1.10152400 | 4.07565800  | -2.32409700 |
| C  | -3.91876600 | 3.49335500  | 0.27291600  |
| H  | -3.39143300 | 1.40970000  | 0.17181900  |
| C  | -3.63772300 | 4.78290500  | -0.17829700 |
| H  | -2.40101500 | 5.98692700  | -1.46848200 |
| H  | -4.71118400 | 3.32916000  | 1.00104200  |
| H  | -4.21033400 | 5.62947600  | 0.19630900  |
| H  | -0.33049900 | 1.94013100  | -3.83267300 |
| H  | 0.49911400  | 2.65957100  | -2.43658900 |
| Ru | 0.04630500  | -0.08177900 | -0.10848400 |
| C  | 2.70382700  | -0.59442000 | -1.55759700 |
| H  | 2.35383000  | -1.54884500 | -2.00475900 |
| H  | 3.53976000  | -0.24843300 | -2.19628700 |
| C  | 1.17382700  | 0.67066800  | -2.87186400 |
| H  | 2.00514100  | 1.02916000  | -3.50942700 |
| H  | 0.78675500  | -0.24700300 | -3.36360500 |
| H  | 2.22262400  | 1.70236100  | -0.71165200 |

|   |             |             |             |
|---|-------------|-------------|-------------|
| O | 0.71128800  | 1.82683000  | 1.25130000  |
| C | 1.36101400  | 2.89433600  | 0.52875700  |
| H | 0.61851600  | 3.28864300  | -0.20187100 |
| H | 1.59936100  | 3.69623500  | 1.24968800  |
| C | -0.26776000 | 2.30470800  | 2.15255400  |
| H | -0.65152200 | 1.44211300  | 2.70487100  |
| H | 0.18604700  | 3.01325000  | 2.86373400  |
| H | -1.10082100 | 2.80459200  | 1.63200600  |
| O | 2.50346400  | 2.43289000  | -0.03442900 |
| H | -0.22233900 | -1.36256300 | -1.02877700 |

**B3**

| -----                   |             |             |             |
|-------------------------|-------------|-------------|-------------|
| Coordinates (Angstroms) |             |             |             |
|                         | X           | Y           | Z           |
| -----                   |             |             |             |
| N                       | -0.11158000 | -1.45078800 | -1.57440700 |
| C                       | 2.32773200  | -1.48755100 | -1.45444300 |
| H                       | 2.39824300  | -0.77961800 | -2.29255800 |
| H                       | 3.23291700  | -2.10604300 | -1.48998200 |
| C                       | -2.53375000 | -1.20194800 | -1.60242300 |
| C                       | -0.02535200 | 1.24108300  | 1.52589400  |
| O                       | 0.01672100  | 1.98903700  | 2.43062100  |
| P                       | -2.38505900 | -0.08226800 | -0.12703600 |
| P                       | 2.19184500  | -0.46688500 | 0.07890200  |
| C                       | 2.82898500  | -1.53172800 | 1.42983400  |
| C                       | 2.51642400  | -1.16681400 | 2.74650300  |
| C                       | 3.60024900  | -2.67915300 | 1.21781200  |
| C                       | 2.97151700  | -1.92276000 | 3.82026600  |
| H                       | 1.89267800  | -0.29059700 | 2.92583600  |
| C                       | 4.04268600  | -3.44688600 | 2.29421500  |
| H                       | 3.85736000  | -2.99398000 | 0.20715000  |
| C                       | 3.73241700  | -3.06930900 | 3.59647700  |
| H                       | 2.71882700  | -1.62390800 | 4.83618700  |
| H                       | 4.63104600  | -4.34437000 | 2.10915500  |
| H                       | 4.07616100  | -3.67020200 | 4.43679500  |
| C                       | 3.51024000  | 0.79210700  | -0.07744500 |
| C                       | 4.86100900  | 0.43321100  | -0.16834800 |
| C                       | 3.16119700  | 2.14541300  | -0.09584500 |
| C                       | 5.84212000  | 1.41096600  | -0.29332200 |
| H                       | 5.14862900  | -0.61828300 | -0.13312200 |
| C                       | 4.14609200  | 3.12445400  | -0.21265900 |
| H                       | 2.10771000  | 2.42248000  | -0.02637300 |
| C                       | 5.48527600  | 2.75873700  | -0.31440600 |
| H                       | 6.88932300  | 1.12176300  | -0.36666100 |
| H                       | 3.86389900  | 4.17617800  | -0.22100500 |

|    |             |             |             |
|----|-------------|-------------|-------------|
| H  | 6.25475400  | 3.52366600  | -0.40546400 |
| C  | -3.36020200 | -0.92638500 | 1.17310500  |
| C  | -2.85156700 | -0.99356000 | 2.47397800  |
| C  | -4.61522400 | -1.49151000 | 0.90704600  |
| C  | -3.57804100 | -1.61440700 | 3.48680800  |
| H  | -1.86925500 | -0.57024600 | 2.68033000  |
| C  | -5.33583200 | -2.12195000 | 1.91671800  |
| H  | -5.04332900 | -1.42586100 | -0.09387700 |
| C  | -4.81742400 | -2.18424400 | 3.20922600  |
| H  | -3.16843600 | -1.65874500 | 4.49446100  |
| H  | -6.30601700 | -2.56373700 | 1.69465700  |
| H  | -5.38090600 | -2.67860900 | 3.99881000  |
| C  | -3.43850500 | 1.35197000  | -0.57760300 |
| C  | -3.06425900 | 2.13992700  | -1.67475400 |
| C  | -4.56562900 | 1.72538600  | 0.16229100  |
| C  | -3.81755300 | 3.24854400  | -2.04323700 |
| H  | -2.15558900 | 1.89067100  | -2.22648100 |
| C  | -5.31166300 | 2.84548200  | -0.19859300 |
| H  | -4.86592100 | 1.14250600  | 1.03071900  |
| C  | -4.94589100 | 3.60469600  | -1.30521800 |
| H  | -3.51641700 | 3.84538900  | -2.90281100 |
| H  | -6.18319400 | 3.12292900  | 0.39203700  |
| H  | -5.53052700 | 4.47859600  | -1.58744200 |
| H  | -3.50079400 | -1.71867200 | -1.63391000 |
| H  | -2.47864100 | -0.57348600 | -2.50361400 |
| Ru | -0.07362200 | 0.05571800  | 0.12135100  |
| H  | -0.22518700 | -1.30269000 | 1.12250600  |
| C  | 1.07161200  | -2.33199800 | -1.57893200 |
| H  | 0.97400200  | -3.01834800 | -0.72659300 |
| H  | 1.09264000  | -2.93529000 | -2.50085900 |
| C  | -1.38510700 | -2.19136200 | -1.59915600 |
| H  | -1.43149700 | -2.84210800 | -2.48744600 |
| H  | -1.41630900 | -2.82781900 | -0.70498400 |
| H  | -0.08290000 | -0.91707100 | -2.44735900 |
| H  | 0.02259900  | 1.34109700  | -1.06346500 |
| C  | -0.12647500 | 0.60733300  | -4.50154900 |
| O  | -0.17047400 | -0.60349800 | -4.43925600 |
| H  | 0.42844300  | 1.14068100  | -5.30260400 |
| H  | -0.71629900 | 1.26402200  | -3.82271400 |
| C  | 1.75736700  | 2.77664200  | -3.26663500 |
| H  | 2.31749100  | 2.90310000  | -4.19934100 |
| H  | 0.76257700  | 3.23941600  | -3.39164500 |
| H  | 2.28735000  | 3.32428700  | -2.47241900 |
| O  | 1.67945700  | 1.39456800  | -2.99783700 |

|   |            |            |             |
|---|------------|------------|-------------|
| H | 1.13764700 | 1.29939800 | -2.16699500 |
|---|------------|------------|-------------|

---

**B4**

---

**Coordinates (Angstroms)**

|   | <b>X</b>    | <b>Y</b>    | <b>Z</b>    |
|---|-------------|-------------|-------------|
| N | 0.07584000  | -1.38373500 | -1.56767900 |
| C | 2.48592500  | -1.69732400 | -1.35024200 |
| H | 2.67824200  | -1.02872900 | -2.20041300 |
| H | 3.30837100  | -2.42217300 | -1.29286600 |
| C | -2.34423200 | -1.06156600 | -1.75116900 |
| C | 0.10158800  | 1.14291600  | 1.61183200  |
| O | 0.04908400  | 1.74886800  | 2.61434000  |
| P | -2.17710500 | 0.03724600  | -0.28550900 |
| P | 2.36791800  | -0.64764000 | 0.15622300  |
| C | 2.93243300  | -1.71634100 | 1.53261300  |
| C | 2.15953900  | -1.86042600 | 2.68793700  |
| C | 4.16578100  | -2.37700200 | 1.45020600  |
| C | 2.60607700  | -2.66068100 | 3.73793600  |
| H | 1.20267600  | -1.34447200 | 2.75706000  |
| C | 4.60739200  | -3.17974700 | 2.49574800  |
| H | 4.78955600  | -2.25597000 | 0.56319600  |
| C | 3.82608000  | -3.32353300 | 3.64190100  |
| H | 1.99488700  | -2.76625300 | 4.63256000  |
| H | 5.56483200  | -3.69218300 | 2.41846300  |
| H | 4.17245400  | -3.95102200 | 4.46140200  |
| C | 3.72896400  | 0.56355000  | 0.02149200  |
| C | 4.79235100  | 0.40382400  | -0.87427600 |
| C | 3.70658100  | 1.68870800  | 0.85620700  |
| C | 5.81206000  | 1.35093700  | -0.93399900 |
| H | 4.82716300  | -0.46170800 | -1.53508600 |
| C | 4.73094900  | 2.62775700  | 0.80223900  |
| H | 2.87552400  | 1.82868400  | 1.54898700  |
| C | 5.78434200  | 2.46195100  | -0.09540300 |
| H | 6.62977400  | 1.21865100  | -1.64044800 |
| H | 4.70237000  | 3.49681000  | 1.45722100  |
| H | 6.58117400  | 3.20208500  | -0.14402300 |
| C | -3.22578500 | -0.68392500 | 1.02462600  |
| C | -3.56252400 | 0.10729700  | 2.13116700  |
| C | -3.64749000 | -2.01710400 | 0.99209100  |
| C | -4.31613900 | -0.42045700 | 3.17354800  |
| H | -3.23581300 | 1.14714900  | 2.17273300  |
| C | -4.40100800 | -2.54433000 | 2.03861100  |
| H | -3.38496400 | -2.65513200 | 0.14894200  |
| C | -4.73857300 | -1.74831900 | 3.12941900  |

|    |             |             |             |
|----|-------------|-------------|-------------|
| H  | -4.57438100 | 0.20767800  | 4.02435900  |
| H  | -4.72485700 | -3.58304800 | 1.99810200  |
| H  | -5.32854900 | -2.16162600 | 3.94552600  |
| C  | -3.08003100 | 1.56675900  | -0.71089200 |
| C  | -2.44955700 | 2.80795800  | -0.58625300 |
| C  | -4.40586400 | 1.51430500  | -1.16221500 |
| C  | -3.13152400 | 3.97994200  | -0.90809300 |
| H  | -1.41687300 | 2.85076000  | -0.23780500 |
| C  | -5.08263600 | 2.68380400  | -1.49224200 |
| H  | -4.91261500 | 0.55238100  | -1.25030300 |
| C  | -4.44605600 | 3.91842300  | -1.36384700 |
| H  | -2.63202100 | 4.94160000  | -0.80522400 |
| H  | -6.11101300 | 2.63353000  | -1.84613300 |
| H  | -4.97876200 | 4.83352300  | -1.61701500 |
| H  | -3.32783600 | -1.54539600 | -1.80938600 |
| H  | -2.24488200 | -0.39632600 | -2.61812000 |
| Ru | 0.12803500  | 0.04155300  | 0.09615400  |
| H  | -0.18244700 | -1.21911200 | 1.04085700  |
| C  | 1.13825800  | -2.37613000 | -1.52990300 |
| H  | 0.98568300  | -3.11814600 | -0.71612100 |
| H  | 1.15009400  | -2.95776200 | -2.47265600 |
| C  | -1.19864100 | -2.06170400 | -1.73163900 |
| H  | -1.20566600 | -2.63818900 | -2.67829200 |
| H  | -1.36985500 | -2.80844900 | -0.92563200 |
| H  | 0.44780800  | -0.41664900 | -2.92063800 |
| H  | 0.87271200  | 1.47225300  | -1.05862800 |
| C  | -0.40733800 | 0.58738300  | -4.32943200 |
| H  | -1.14208900 | -0.22611400 | -4.54521600 |
| H  | -0.14061500 | 1.06043200  | -5.29311100 |
| O  | -1.06896600 | 1.55382000  | -3.50891900 |
| C  | -2.26537700 | 1.97824300  | -4.10503300 |
| H  | -2.98961200 | 1.14916200  | -4.22057400 |
| H  | -2.70763200 | 2.74546900  | -3.46219300 |
| H  | -2.09278100 | 2.41252000  | -5.10612700 |
| O  | 0.72399100  | 0.14450300  | -3.72594100 |
| H  | 0.14007900  | 1.42305900  | -1.35948500 |

-----  
**TSB1**  
-----

**Coordinates (Angstroms)**  
-----

|   | <b>X</b>    | <b>Y</b>   | <b>Z</b>    |
|---|-------------|------------|-------------|
| C | -0.63345600 | 0.80857600 | 0.48484400  |
| H | -0.27402000 | 1.44172300 | 1.30545000  |
| H | -1.67168300 | 1.04644100 | 0.17887900  |
| O | 0.14377500  | 1.45775800 | -0.87835400 |

|   |             |             |             |
|---|-------------|-------------|-------------|
| C | -0.51446700 | 2.62493800  | -1.38042300 |
| H | -0.43871900 | 3.41178600  | -0.62470300 |
| H | 0.00076400  | 2.94055800  | -2.29111900 |
| H | -1.57101500 | 2.42315600  | -1.60118100 |
| O | -0.26152400 | -0.42916400 | 0.50758400  |
| H | -0.54737100 | -0.73783100 | -0.60056200 |
| H | -0.15871800 | 0.59089800  | -1.48458900 |
| H | -0.68708400 | -0.54421000 | -1.68646700 |

**TSB2**

| -----                   |             |             |             |
|-------------------------|-------------|-------------|-------------|
| Coordinates (Angstroms) |             |             |             |
|                         | X           | Y           | Z           |
| -----                   |             |             |             |
| C                       | 0.12335300  | -1.40518000 | 1.39335800  |
| H                       | 0.67953000  | -2.02616000 | 0.67261700  |
| H                       | 0.48620900  | -1.61622500 | 2.40459500  |
| H                       | -0.93890300 | -1.67261400 | 1.33907900  |
| O                       | 0.27670700  | -0.02105100 | 1.13774100  |
| H                       | 1.43818100  | 0.33246100  | 1.09941200  |
| C                       | -0.08949600 | 0.39089700  | -0.44227100 |
| O                       | 0.55214400  | 1.46509600  | -0.73577000 |
| H                       | -1.19051700 | 0.46560900  | -0.37674200 |
| H                       | 0.20754600  | -0.56928400 | -0.93105200 |
| C                       | 3.31152400  | -0.05678700 | 0.05156000  |
| H                       | 4.15848500  | 0.46885300  | -0.40175000 |
| H                       | 3.69070800  | -0.73269700 | 0.82546700  |
| H                       | 2.81013100  | -0.64993800 | -0.72838400 |
| O                       | 2.43413500  | 0.89119200  | 0.65036700  |
| H                       | 1.75435500  | 1.30919500  | -0.14182100 |

**TSB3**

| -----                   |             |             |            |
|-------------------------|-------------|-------------|------------|
| Coordinates (Angstroms) |             |             |            |
|                         | X           | Y           | Z          |
| -----                   |             |             |            |
| N                       | -1.35072000 | 10.14657000 | 4.78493400 |
| C                       | 0.21442500  | 8.85370800  | 6.13959500 |
| H                       | 0.69046400  | 9.75685800  | 6.54071600 |
| H                       | 0.95977100  | 8.04861600  | 6.14947900 |
| C                       | -2.92729000 | 11.49841000 | 3.50812900 |
| C                       | -4.34519500 | 9.08388900  | 7.31148700 |
| O                       | -5.22693600 | 8.66810000  | 7.96651300 |
| P                       | -4.21833400 | 10.86737500 | 4.66452700 |
| P                       | -1.23099500 | 8.45207200  | 7.21774400 |
| C                       | -1.29570300 | 6.62715800  | 7.27961900 |
| C                       | -0.16421500 | 5.88466400  | 7.64701300 |
| C                       | -2.48365100 | 5.95230400  | 6.98434000 |



|    |             |             |             |
|----|-------------|-------------|-------------|
| C  | -0.22155100 | 4.49695900  | 7.71036800  |
| H  | 0.76403500  | 6.40006100  | 7.89739200  |
| C  | -2.54145000 | 4.56185000  | 7.05329900  |
| H  | -3.36451500 | 6.52601700  | 6.69859100  |
| C  | -1.41166700 | 3.83339600  | 7.41334400  |
| H  | 0.66372200  | 3.93021700  | 7.99383800  |
| H  | -3.47332600 | 4.04755200  | 6.82408600  |
| H  | -1.45620800 | 2.74679300  | 7.46485000  |
| C  | -0.74378300 | 8.92810400  | 8.91069900  |
| C  | -0.12955500 | 10.16937300 | 9.13446300  |
| C  | -1.09822000 | 8.13642200  | 10.01074700 |
| C  | 0.14762600  | 10.58872900 | 10.43162500 |
| H  | 0.10025000  | 10.82074300 | 8.29143100  |
| C  | -0.82420500 | 8.56470300  | 11.30668200 |
| H  | -1.58805100 | 7.17546100  | 9.85408500  |
| C  | -0.19693700 | 9.78940800  | 11.52035800 |
| H  | 0.63171600  | 11.55111700 | 10.59212600 |
| H  | -1.10113600 | 7.93645800  | 12.15179700 |
| H  | 0.01969600  | 10.12238400 | 12.53426400 |
| C  | -5.42797600 | 9.99886100  | 3.59632500  |
| C  | -5.76101800 | 8.66491300  | 3.84624600  |
| C  | -6.05765200 | 10.67221500 | 2.53994200  |
| C  | -6.69925900 | 8.01146300  | 3.05030900  |
| H  | -5.27553300 | 8.14324300  | 4.67024900  |
| C  | -6.99014500 | 10.01781600 | 1.74346900  |
| H  | -5.82236300 | 11.72001700 | 2.34612100  |
| C  | -7.31269400 | 8.68490200  | 1.99824400  |
| H  | -6.95148100 | 6.97263000  | 3.25615600  |
| H  | -7.47195600 | 10.54944400 | 0.92460500  |
| H  | -8.04615300 | 8.17418500  | 1.37629300  |
| C  | -5.18440400 | 12.32180000 | 5.20502900  |
| C  | -4.89101200 | 13.63537200 | 4.82325900  |
| C  | -6.25083900 | 12.09532600 | 6.08833700  |
| C  | -5.64630600 | 14.69878400 | 5.31476900  |
| H  | -4.07155000 | 13.83846700 | 4.13506100  |
| C  | -7.00727500 | 13.15634400 | 6.57107900  |
| H  | -6.48412200 | 11.07640500 | 6.40198900  |
| C  | -6.70307200 | 14.46286700 | 6.18878700  |
| H  | -5.40502700 | 15.71594700 | 5.01045900  |
| H  | -7.83254800 | 12.96450000 | 7.25467900  |
| H  | -7.29091700 | 15.29504800 | 6.57228000  |
| H  | -3.33464500 | 11.73567400 | 2.51664800  |
| H  | -2.51340200 | 12.42394400 | 3.93169300  |
| Ru | -2.96269500 | 9.64079700  | 6.19874400  |

|   |             |             |            |
|---|-------------|-------------|------------|
| C | -0.30409900 | 9.13071700  | 4.73816500 |
| H | -0.68613300 | 8.19604300  | 4.28430600 |
| H | 0.53285800  | 9.46991300  | 4.09965400 |
| C | -1.82588400 | 10.45251000 | 3.44238800 |
| H | -0.99739000 | 10.82983600 | 2.81474200 |
| H | -2.20607700 | 9.53998700  | 2.94336800 |
| H | -0.85885600 | 11.22783900 | 5.47860400 |
| O | -2.31859500 | 11.54541200 | 7.53420300 |
| C | -1.57641700 | 12.56846300 | 6.79045100 |
| H | -2.32218500 | 13.00818500 | 6.08063900 |
| H | -1.30511700 | 13.35338400 | 7.52520500 |
| C | -3.30510200 | 12.11705800 | 8.36689400 |
| H | -3.82342000 | 11.30217700 | 8.88158400 |
| H | -2.83233300 | 12.77000700 | 9.11849700 |
| H | -4.03725600 | 12.71090000 | 7.79477900 |
| O | -0.49640500 | 12.02835100 | 6.22110000 |
| H | -3.20220600 | 8.35627400  | 5.27330200 |

---

**TSB4**

---

| <b>Coordinates (Angstroms)</b> |             |             |             |
|--------------------------------|-------------|-------------|-------------|
|                                | <b>X</b>    | <b>Y</b>    | <b>Z</b>    |
| N                              | -0.13311000 | -0.98301100 | -1.18403600 |
| C                              | 2.29360300  | -1.00045500 | -1.10774300 |
| H                              | 2.29729200  | -0.30198900 | -1.95744100 |
| H                              | 3.21425100  | -1.59355600 | -1.17101800 |
| C                              | -2.54937700 | -0.73449200 | -1.27043500 |
| C                              | -0.06547700 | 1.71633600  | 1.89337300  |
| O                              | -0.03838900 | 2.44650200  | 2.80995200  |
| P                              | -2.41591200 | 0.39622700  | 0.19164300  |
| P                              | 2.18616200  | 0.02985000  | 0.41513700  |
| C                              | 2.81952200  | -1.01402600 | 1.77862200  |
| C                              | 2.52582100  | -0.62190100 | 3.09202900  |
| C                              | 3.57016500  | -2.17678300 | 1.57608900  |
| C                              | 2.98065400  | -1.36739000 | 4.17331700  |
| H                              | 1.92212100  | 0.26970000  | 3.26442500  |
| C                              | 4.01378100  | -2.93179200 | 2.66071200  |
| H                              | 3.80979200  | -2.51043100 | 0.56721900  |
| C                              | 3.72279100  | -2.52787300 | 3.95972300  |
| H                              | 2.74402100  | -1.04825900 | 5.18691600  |
| H                              | 4.58794100  | -3.84015700 | 2.48517400  |
| H                              | 4.06747300  | -3.11930900 | 4.80623000  |
| C                              | 3.48060200  | 1.30133400  | 0.21588100  |
| C                              | 4.83543500  | 0.95353600  | 0.14501700  |
| C                              | 3.11279000  | 2.64535400  | 0.11178000  |

|    |             |             |             |
|----|-------------|-------------|-------------|
| C  | 5.80314500  | 1.93514400  | -0.03844900 |
| H  | 5.13611200  | -0.09059900 | 0.24105100  |
| C  | 4.08347900  | 3.62769900  | -0.06993700 |
| H  | 2.05726400  | 2.91445100  | 0.16842700  |
| C  | 5.42761900  | 3.27348000  | -0.14641600 |
| H  | 6.85403700  | 1.65600900  | -0.09337700 |
| H  | 3.78667600  | 4.67239100  | -0.15051300 |
| H  | 6.18683900  | 4.04106800  | -0.28635600 |
| C  | -3.41947800 | -0.40162000 | 1.49333600  |
| C  | -2.92832600 | -0.46958400 | 2.80086900  |
| C  | -4.69349800 | -0.91790200 | 1.21786100  |
| C  | -3.69287000 | -1.04401100 | 3.81338300  |
| H  | -1.93535400 | -0.07751700 | 3.01746600  |
| C  | -5.45200500 | -1.49999500 | 2.22789500  |
| H  | -5.10381900 | -0.85039000 | 0.20974700  |
| C  | -4.95223300 | -1.56312800 | 3.52804400  |
| H  | -3.29903900 | -1.08861200 | 4.82716500  |
| H  | -6.43813800 | -1.90168100 | 2.00092600  |
| H  | -5.54741900 | -2.01794900 | 4.31809200  |
| C  | -3.40166500 | 1.86391400  | -0.27933000 |
| C  | -3.05450300 | 2.57536700  | -1.43683400 |
| C  | -4.43997800 | 2.34741700  | 0.52374500  |
| C  | -3.75200000 | 3.72286200  | -1.79615800 |
| H  | -2.22061000 | 2.23380000  | -2.05416300 |
| C  | -5.13020800 | 3.50316900  | 0.16715900  |
| H  | -4.71431400 | 1.82159500  | 1.43654800  |
| C  | -4.79327700 | 4.19000100  | -0.99478300 |
| H  | -3.47458900 | 4.25999900  | -2.70193100 |
| H  | -5.93520500 | 3.86600900  | 0.80416600  |
| H  | -5.33544500 | 5.09183000  | -1.27378500 |
| H  | -3.52072600 | -1.24223200 | -1.31098000 |
| H  | -2.46796800 | -0.11767500 | -2.17724000 |
| Ru | -0.09992600 | 0.53601300  | 0.47241000  |
| H  | -0.24649500 | -0.73120400 | 1.50077300  |
| C  | 1.04830800  | -1.86539400 | -1.18175200 |
| H  | 0.97648300  | -2.54142300 | -0.31779300 |
| H  | 1.05779700  | -2.47996800 | -2.09571300 |
| C  | -1.40272900 | -1.72588800 | -1.23104600 |
| H  | -1.42775600 | -2.37691700 | -2.11981800 |
| H  | -1.46339900 | -2.36658300 | -0.34059600 |
| H  | -0.06806000 | -0.45439900 | -2.08226200 |
| H  | -0.06114100 | 1.89435900  | -0.77550600 |
| C  | 0.28337300  | 1.32965500  | -3.84022100 |
| O  | 0.30647500  | 0.08779600  | -3.69445800 |

|   |             |            |             |
|---|-------------|------------|-------------|
| H | 0.82868500  | 1.79831400 | -4.69226100 |
| H | -0.64544400 | 1.91579000 | -3.60660900 |
| C | 1.22092200  | 3.51426500 | -2.74436100 |
| H | 2.13428300  | 3.87898700 | -3.23716700 |
| H | 0.35184700  | 3.83015300 | -3.35431200 |
| H | 1.12976100  | 4.02120300 | -1.76920600 |
| O | 1.26320600  | 2.12413300 | -2.57783800 |
| H | 0.52434900  | 1.89310800 | -1.48065100 |

**B5**

| -----                   |             |             |             |
|-------------------------|-------------|-------------|-------------|
| Coordinates (Angstroms) |             |             |             |
|                         | X           | Y           | Z           |
| -----                   |             |             |             |
| N                       | -0.21189500 | -1.27770700 | -1.80032200 |
| C                       | 2.23008900  | -1.30035600 | -1.94397100 |
| H                       | 2.24627800  | -0.49441500 | -2.68772100 |
| H                       | 3.12980900  | -1.91141100 | -2.09269400 |
| C                       | -2.64872500 | -1.19592900 | -1.69840800 |
| C                       | 0.03705200  | 1.12037600  | 1.44485900  |
| O                       | 0.13077800  | 1.79194900  | 2.40617100  |
| P                       | -2.41265000 | -0.24926300 | -0.13055500 |
| P                       | 2.18028400  | -0.46258200 | -0.30772700 |
| C                       | 2.86652900  | -1.66556000 | 0.89281000  |
| C                       | 3.34264200  | -2.93140400 | 0.53869700  |
| C                       | 2.88552500  | -1.29222000 | 2.24454800  |
| C                       | 3.82948200  | -3.80302000 | 1.51277100  |
| H                       | 3.33028600  | -3.25391400 | -0.50136300 |
| C                       | 3.38134900  | -2.15644500 | 3.21281100  |
| H                       | 2.49804200  | -0.31484800 | 2.53717900  |
| C                       | 3.85385500  | -3.41750700 | 2.84888700  |
| H                       | 4.19017000  | -4.78815100 | 1.22088000  |
| H                       | 3.39220100  | -1.84865100 | 4.25709100  |
| H                       | 4.23494400  | -4.09866500 | 3.60785600  |
| C                       | 3.49508300  | 0.81049300  | -0.33172900 |
| C                       | 4.82298200  | 0.47768900  | -0.62607600 |
| C                       | 3.17580400  | 2.13704900  | -0.02699600 |
| C                       | 5.81106500  | 1.45815800  | -0.62709600 |
| H                       | 5.08795800  | -0.55765000 | -0.84550400 |
| C                       | 4.16669600  | 3.11576800  | -0.01633200 |
| H                       | 2.13802200  | 2.39672100  | 0.18861400  |
| C                       | 5.48387700  | 2.77821400  | -0.31965600 |
| H                       | 6.84033000  | 1.19018400  | -0.86050000 |
| H                       | 3.90804600  | 4.14521100  | 0.22706000  |
| H                       | 6.25859100  | 3.54336200  | -0.31262300 |
| C                       | -3.28237900 | -1.22153300 | 1.15709900  |

|    |             |             |             |
|----|-------------|-------------|-------------|
| C  | -2.65483600 | -1.48777600 | 2.37764700  |
| C  | -4.59332500 | -1.67274200 | 0.95397300  |
| C  | -3.32214900 | -2.19995500 | 3.37232600  |
| H  | -1.63639800 | -1.13571100 | 2.54037300  |
| C  | -5.25650200 | -2.38852900 | 1.94452100  |
| H  | -5.10466400 | -1.45447200 | 0.01513300  |
| C  | -4.61993300 | -2.65412400 | 3.15647600  |
| H  | -2.82182500 | -2.40155100 | 4.31793100  |
| H  | -6.27363000 | -2.73704200 | 1.77280200  |
| H  | -5.13902200 | -3.21349900 | 3.93302800  |
| C  | -3.49871400 | 1.21208200  | -0.31408100 |
| C  | -3.21770800 | 2.35531000  | 0.44335400  |
| C  | -4.60423200 | 1.22344900  | -1.17308800 |
| C  | -4.03198800 | 3.48018800  | 0.35474600  |
| H  | -2.34878100 | 2.36066800  | 1.10228900  |
| C  | -5.41515400 | 2.35185800  | -1.26582400 |
| H  | -4.83626300 | 0.34635600  | -1.77750700 |
| C  | -5.13106400 | 3.48126200  | -0.50172500 |
| H  | -3.80188000 | 4.36184300  | 0.95054100  |
| H  | -6.26991100 | 2.34929800  | -1.94048500 |
| H  | -5.76431500 | 4.36372200  | -0.57640300 |
| H  | -3.57648300 | -1.78274300 | -1.69939400 |
| H  | -2.71994000 | -0.45517200 | -2.50675600 |
| Ru | -0.09057000 | -0.01760500 | -0.02513200 |
| H  | -0.04647400 | -1.25044000 | 0.98459000  |
| C  | 0.94720200  | -2.10800200 | -2.08011300 |
| H  | 0.99004200  | -2.98881800 | -1.40273500 |
| H  | 0.88506000  | -2.52475000 | -3.10485900 |
| C  | -1.42390400 | -2.07093100 | -1.91275000 |
| H  | -1.48806100 | -2.54055500 | -2.91427700 |
| H  | -1.43652600 | -2.91177700 | -1.18682200 |
| C  | 0.32092200  | 2.24638900  | -2.69882000 |
| H  | 0.25105700  | 3.19819100  | -2.14233100 |
| H  | -0.01812900 | 2.42326200  | -3.74038000 |
| O  | 1.64447100  | 1.77596900  | -2.71375700 |
| C  | 2.52606100  | 2.71128200  | -3.28359400 |
| H  | 2.53176100  | 3.66170900  | -2.72342500 |
| H  | 3.52922200  | 2.27662700  | -3.24917800 |
| H  | 2.26671800  | 2.93070200  | -4.33361700 |
| O  | -0.49057300 | 1.32966400  | -2.06030700 |
| H  | -0.33815000 | 0.38566900  | -2.41021800 |

-----  
**TSB5**

-----  
**Coordinates (Angstroms)**

|   | X           | Y           | Z           |
|---|-------------|-------------|-------------|
| N | -0.27588400 | -0.40033000 | -1.46756400 |
| C | 2.17071100  | -0.43217900 | -1.58076100 |
| H | 2.21341200  | 0.37973400  | -2.31579000 |
| H | 3.06529200  | -1.05331400 | -1.71657400 |
| C | -2.71344300 | -0.27157000 | -1.38416700 |
| C | -0.03101900 | 1.95697200  | 1.82394900  |
| O | 0.06896700  | 2.63380500  | 2.78010800  |
| P | -2.48920400 | 0.62746000  | 0.21511100  |
| P | 2.11110900  | 0.40007200  | 0.06105600  |
| C | 2.81782400  | -0.79429500 | 1.25759400  |
| C | 3.27522800  | -2.06761300 | 0.90595100  |
| C | 2.86814300  | -0.40833000 | 2.60498500  |
| C | 3.77588300  | -2.93389600 | 1.87773700  |
| H | 3.23829300  | -2.40014500 | -0.13038100 |
| C | 3.37651400  | -1.26777100 | 3.57089100  |
| H | 2.49589000  | 0.57520200  | 2.89630100  |
| C | 3.83140400  | -2.53597500 | 3.20927800  |
| H | 4.12300600  | -3.92441500 | 1.58769600  |
| H | 3.41164500  | -0.95040400 | 4.61173400  |
| H | 4.22308100  | -3.21295400 | 3.96655300  |
| C | 3.40737500  | 1.69040800  | 0.02238600  |
| C | 4.74300300  | 1.36802100  | -0.24753800 |
| C | 3.06425300  | 3.02142400  | 0.27760200  |
| C | 5.71525300  | 2.36362000  | -0.27593100 |
| H | 5.02595800  | 0.32998000  | -0.42845300 |
| C | 4.03963300  | 4.01542800  | 0.26154200  |
| H | 2.02071800  | 3.27321600  | 0.47301300  |
| C | 5.36445000  | 3.68829200  | -0.01880000 |
| H | 6.75063700  | 2.10414300  | -0.49111200 |
| H | 3.76255400  | 5.04868000  | 0.46514900  |
| H | 6.12699100  | 4.46546300  | -0.03318600 |
| C | -3.38883000 | -0.36857000 | 1.46263700  |
| C | -2.78467600 | -0.65640000 | 2.69018600  |
| C | -4.69541600 | -0.81625100 | 1.22655700  |
| C | -3.47024900 | -1.38583700 | 3.65943600  |
| H | -1.76948400 | -0.30747900 | 2.87784000  |
| C | -5.37659100 | -1.54993700 | 2.19159300  |
| H | -5.18969800 | -0.58147600 | 0.28272500  |
| C | -4.76327200 | -1.83670700 | 3.41069000  |
| H | -2.98786800 | -1.60384700 | 4.61064800  |
| H | -6.38991500 | -1.89573100 | 1.99408600  |
| H | -5.29686500 | -2.41003500 | 4.16693500  |
| C | -3.55038900 | 2.10743100  | 0.04586100  |

|    |             |             |             |
|----|-------------|-------------|-------------|
| C  | -3.25113600 | 3.24037900  | 0.81127800  |
| C  | -4.65626400 | 2.14155900  | -0.81204500 |
| C  | -4.04800900 | 4.37847700  | 0.73100700  |
| H  | -2.38178100 | 3.22786100  | 1.46925700  |
| C  | -5.44963500 | 3.28277300  | -0.89612800 |
| H  | -4.90145200 | 1.27320300  | -1.42377800 |
| C  | -5.14751600 | 4.40227000  | -0.12427700 |
| H  | -3.80354300 | 5.25238000  | 1.33238600  |
| H  | -6.30447300 | 3.29840000  | -1.57042400 |
| H  | -5.76684200 | 5.29502500  | -0.19255600 |
| H  | -3.64939500 | -0.84376600 | -1.41591900 |
| H  | -2.76197500 | 0.49674200  | -2.16715000 |
| Ru | -0.16210000 | 0.83293800  | 0.35161000  |
| H  | -0.11853300 | -0.40145600 | 1.36870600  |
| C  | 0.88616200  | -1.22733100 | -1.76013000 |
| H  | 0.89920100  | -2.12011500 | -1.10344000 |
| H  | 0.83423900  | -1.61242400 | -2.79629300 |
| C  | -1.50599200 | -1.16530400 | -1.61747200 |
| H  | -1.56884200 | -1.60287900 | -2.63207600 |
| H  | -1.52741700 | -2.01969900 | -0.91322700 |
| C  | 0.19293200  | 2.95931700  | -2.36815700 |
| H  | 0.11426700  | 3.93379800  | -1.84564600 |
| H  | -0.15795400 | 3.10403500  | -3.41348600 |
| O  | 1.54789600  | 2.55076200  | -2.40277400 |
| C  | 2.37387900  | 3.52722400  | -2.97962200 |
| H  | 2.34255000  | 4.47701600  | -2.41749600 |
| H  | 3.39905600  | 3.14429400  | -2.96314100 |
| H  | 2.09092800  | 3.73983700  | -4.02574700 |
| O  | -0.56454100 | 2.03144400  | -1.71257700 |
| H  | -0.36646600 | 0.94719400  | -1.96990100 |

**B6**

| -----                   |             |             |             |
|-------------------------|-------------|-------------|-------------|
| Coordinates (Angstroms) |             |             |             |
|                         | X           | Y           | Z           |
| -----                   |             |             |             |
| N                       | 0.06345600  | -1.38364900 | -1.19237100 |
| C                       | 2.47264100  | -1.52730800 | -0.90102100 |
| H                       | 2.62570900  | -1.00703700 | -1.85544900 |
| H                       | 3.33479400  | -2.18509500 | -0.73475000 |
| C                       | -2.29045700 | -0.94386700 | -1.61426600 |
| C                       | 0.04572400  | 1.72895600  | 1.44550800  |
| O                       | 0.03254600  | 2.61355000  | 2.21753100  |
| P                       | -2.21989800 | 0.33646700  | -0.27487500 |
| P                       | 2.31343300  | -0.22595500 | 0.40259500  |
| C                       | 2.99847200  | -0.98166000 | 1.92321500  |

|   |             |             |             |
|---|-------------|-------------|-------------|
| C | 4.29410200  | -1.51624000 | 1.94486600  |
| C | 2.24080200  | -0.98397800 | 3.09790100  |
| C | 4.81252900  | -2.05692900 | 3.11619400  |
| H | 4.90559100  | -1.49565900 | 1.04139700  |
| C | 2.76476200  | -1.51875500 | 4.27298600  |
| H | 1.23602300  | -0.56218600 | 3.07854900  |
| C | 4.04708000  | -2.05853900 | 4.28256600  |
| H | 5.81936000  | -2.47153800 | 3.12299100  |
| H | 2.16706500  | -1.51223800 | 5.18287700  |
| H | 4.45635500  | -2.47697800 | 5.20068300  |
| C | 3.56668600  | 1.03708800  | -0.00133100 |
| C | 4.36251700  | 1.01712200  | -1.15030100 |
| C | 3.67462000  | 2.12285300  | 0.87985900  |
| C | 5.24411400  | 2.06384000  | -1.41453600 |
| H | 4.29942200  | 0.18803800  | -1.85290100 |
| C | 4.55924700  | 3.16125700  | 0.61836000  |
| H | 3.05277100  | 2.15567800  | 1.77537900  |
| C | 5.34340100  | 3.13668800  | -0.53426300 |
| H | 5.85341100  | 2.03846600  | -2.31640600 |
| H | 4.62922200  | 3.99829400  | 1.31085800  |
| H | 6.02972100  | 3.95490700  | -0.74573200 |
| C | -3.43216400 | -0.21629700 | 0.97617400  |
| C | -3.11792400 | -0.09139600 | 2.33348200  |
| C | -4.68697500 | -0.72561500 | 0.61450400  |
| C | -4.03626500 | -0.47011600 | 3.30942900  |
| H | -2.14079800 | 0.29796700  | 2.61821900  |
| C | -5.59963800 | -1.11406400 | 1.59007900  |
| H | -4.96265300 | -0.80440300 | -0.43750800 |
| C | -5.27511200 | -0.98638000 | 2.93951600  |
| H | -3.77941100 | -0.36531500 | 4.36216300  |
| H | -6.56926500 | -1.51242500 | 1.29571700  |
| H | -5.99060500 | -1.28938900 | 3.70225600  |
| C | -3.00845900 | 1.79326400  | -1.04535300 |
| C | -2.40888800 | 2.34641200  | -2.18760500 |
| C | -4.13158500 | 2.41781700  | -0.49212200 |
| C | -2.94588800 | 3.48810600  | -2.77311200 |
| H | -1.49684100 | 1.90323700  | -2.59072900 |
| C | -4.66269400 | 3.56125600  | -1.08333000 |
| H | -4.59700300 | 2.01358700  | 0.40560800  |
| C | -4.07595900 | 4.09539900  | -2.22699400 |
| H | -2.46480600 | 3.90902100  | -3.65566500 |
| H | -5.53901700 | 4.03627300  | -0.64463800 |
| H | -4.49237500 | 4.99055200  | -2.68676700 |
| H | -3.29203800 | -1.37777200 | -1.71998300 |



|    |             |             |             |
|----|-------------|-------------|-------------|
| H  | -2.06665700 | -0.42478800 | -2.55686400 |
| Ru | 0.05344800  | 0.32414700  | 0.25975000  |
| H  | -0.30835200 | -0.68858200 | 1.49816000  |
| C  | 1.17851600  | -2.31968200 | -0.98293400 |
| H  | 0.98425400  | -2.86862600 | -0.05177000 |
| H  | 1.22959000  | -3.05635900 | -1.80099400 |
| C  | -1.25128600 | -2.01977500 | -1.36065300 |
| H  | -1.23130200 | -2.74286400 | -2.19217500 |
| H  | -1.47357200 | -2.57675100 | -0.44057600 |
| C  | 0.80023700  | 2.49343900  | -1.81402600 |
| H  | 1.81813500  | 2.81145500  | -1.46527600 |
| H  | 0.06248400  | 3.11667600  | -1.24028200 |
| O  | 0.68648400  | 2.89698200  | -3.19272900 |
| C  | 0.93969400  | 4.26179400  | -3.32707900 |
| H  | 1.96668000  | 4.52995500  | -3.01120900 |
| H  | 0.82198700  | 4.52725800  | -4.38409800 |
| H  | 0.24123900  | 4.88031600  | -2.73036900 |
| O  | 0.58053900  | 1.17472800  | -1.73455400 |
| H  | 0.26433200  | -0.80547400 | -2.01838500 |

-----  
**TSB6**  
-----

**Coordinates (Angstroms)**  
-----

|   | <b>X</b>    | <b>Y</b>    | <b>Z</b>    |
|---|-------------|-------------|-------------|
| N | 0.19041000  | -1.16549400 | -1.22556400 |
| C | 2.56010000  | -1.51523900 | -0.74148200 |
| H | 2.88040800  | -1.04285600 | -1.67637900 |
| H | 3.31393100  | -2.25031400 | -0.43354500 |
| C | -2.07397700 | -0.56698900 | -1.87740600 |
| C | 0.02212000  | 1.67862800  | 1.70059600  |
| O | -0.07128000 | 2.37562000  | 2.64044700  |
| P | -2.11297700 | 0.52502300  | -0.39272200 |
| P | 2.38084300  | -0.15344800 | 0.49414700  |
| C | 2.96627700  | -0.88476600 | 2.07092900  |
| C | 4.25328400  | -1.43146700 | 2.17053400  |
| C | 2.14237600  | -0.88539400 | 3.20033400  |
| C | 4.69984600  | -1.97563000 | 3.36921700  |
| H | 4.91660400  | -1.41818400 | 1.30417800  |
| C | 2.59190900  | -1.42643200 | 4.40353900  |
| H | 1.14279800  | -0.45685100 | 3.13155200  |
| C | 3.86810800  | -1.97400600 | 4.48877500  |
| H | 5.70188000  | -2.39669300 | 3.43378000  |
| H | 1.94115000  | -1.41781600 | 5.27626600  |
| H | 4.22029100  | -2.39552800 | 5.42875400  |
| C | 3.67476000  | 1.06750000  | 0.10561000  |

|    |             |             |             |
|----|-------------|-------------|-------------|
| C  | 4.78233800  | 0.77460200  | -0.69709200 |
| C  | 3.55256000  | 2.34912700  | 0.65509300  |
| C  | 5.74518000  | 1.74770200  | -0.94787600 |
| H  | 4.89276500  | -0.21429200 | -1.14065200 |
| C  | 4.51700300  | 3.31967600  | 0.40448000  |
| H  | 2.68829100  | 2.59137600  | 1.27483000  |
| C  | 5.61480500  | 3.02128800  | -0.39907300 |
| H  | 6.59926500  | 1.50956700  | -1.57982000 |
| H  | 4.40570700  | 4.31418700  | 0.83296200  |
| H  | 6.36732300  | 3.78183800  | -0.60008900 |
| C  | -3.35992000 | -0.23803000 | 0.71435300  |
| C  | -3.09341200 | -0.38559800 | 2.07896500  |
| C  | -4.60669100 | -0.64160200 | 0.21858400  |
| C  | -4.04875300 | -0.93861900 | 2.92907000  |
| H  | -2.12996200 | -0.06314000 | 2.47265800  |
| C  | -5.55606900 | -1.20280000 | 1.06566100  |
| H  | -4.84264400 | -0.50632400 | -0.83798200 |
| C  | -5.27680700 | -1.35412600 | 2.42317100  |
| H  | -3.82923900 | -1.04642400 | 3.98996500  |
| H  | -6.51839900 | -1.51950500 | 0.66693500  |
| H  | -6.02074100 | -1.79112500 | 3.08708600  |
| C  | -2.96934800 | 2.03882700  | -0.94102200 |
| C  | -3.68802400 | 2.10383800  | -2.13974500 |
| C  | -2.93010300 | 3.16404800  | -0.10819000 |
| C  | -4.35682300 | 3.27189700  | -2.49636900 |
| H  | -3.72195900 | 1.24310900  | -2.80668300 |
| C  | -3.60282600 | 4.32836900  | -0.46447400 |
| H  | -2.36483600 | 3.12763100  | 0.82427300  |
| C  | -4.31528100 | 4.38493000  | -1.66088500 |
| H  | -4.90947200 | 3.31179500  | -3.43380000 |
| H  | -3.56394000 | 5.19678800  | 0.19059400  |
| H  | -4.83778700 | 5.29766000  | -1.94223700 |
| H  | -3.06656100 | -0.94238900 | -2.15679600 |
| H  | -1.69552000 | 0.05794500  | -2.69900600 |
| Ru | 0.12971700  | 0.47763100  | 0.30357500  |
| H  | -0.27011200 | -0.66021300 | 1.32865600  |
| C  | 1.20954200  | -2.18441100 | -0.94548400 |
| H  | 0.90469600  | -2.74287100 | -0.04828600 |
| H  | 1.26930300  | -2.90565700 | -1.77738400 |
| C  | -1.11046800 | -1.71083300 | -1.61584300 |
| H  | -1.01270700 | -2.34242000 | -2.51370900 |
| H  | -1.47781200 | -2.35435500 | -0.80189300 |
| C  | 1.06056600  | 2.04360700  | -2.10708000 |
| H  | 1.72960400  | 2.87822300  | -2.46489900 |

|   |             |             |             |
|---|-------------|-------------|-------------|
| H | 0.72427300  | 2.39310000  | -1.06697200 |
| O | -0.15742100 | 2.14223500  | -2.91638600 |
| C | -0.60267100 | 3.46363200  | -2.98181800 |
| H | 0.14458300  | 4.12563000  | -3.45989100 |
| H | -1.52272600 | 3.49197400  | -3.57601200 |
| H | -0.82414800 | 3.88608400  | -1.98210800 |
| O | 1.59133700  | 0.84595700  | -2.16276600 |
| H | 0.57672700  | -0.49799500 | -1.94067000 |

**B6'**

| -----                   |             |             |             |
|-------------------------|-------------|-------------|-------------|
| Coordinates (Angstroms) |             |             |             |
|                         | X           | Y           | Z           |
| -----                   |             |             |             |
| N                       | 0.10275700  | -1.76261600 | -1.41155600 |
| C                       | 2.46348600  | -2.04608200 | -0.94122000 |
| H                       | 2.71215300  | -1.53567500 | -1.88236000 |
| H                       | 3.27335100  | -2.74527800 | -0.69913500 |
| C                       | -2.16573200 | -1.20603200 | -2.05672900 |
| C                       | -0.05746600 | 1.22027400  | 1.35573500  |
| O                       | -0.12971700 | 2.03033300  | 2.20270600  |
| P                       | -2.22558100 | -0.08332800 | -0.59843900 |
| P                       | 2.25873400  | -0.72608600 | 0.33851000  |
| C                       | 2.85415400  | -1.46516100 | 1.90274400  |
| C                       | 4.12646800  | -2.04708900 | 1.98196900  |
| C                       | 2.04929200  | -1.42833900 | 3.04512700  |
| C                       | 4.57948900  | -2.59013200 | 3.17882500  |
| H                       | 4.77254000  | -2.06420500 | 1.10296700  |
| C                       | 2.50716000  | -1.96745800 | 4.24566900  |
| H                       | 1.05960800  | -0.97569600 | 2.98476300  |
| C                       | 3.76851000  | -2.55143000 | 4.31291000  |
| H                       | 5.56891200  | -3.04156200 | 3.22945500  |
| H                       | 1.87338300  | -1.93202400 | 5.12994900  |
| H                       | 4.12564700  | -2.97299700 | 5.25093100  |
| C                       | 3.53933600  | 0.51016300  | -0.06771100 |
| C                       | 4.67796900  | 0.20361600  | -0.82209400 |
| C                       | 3.35942000  | 1.82245100  | 0.38824500  |
| C                       | 5.62012600  | 1.18853200  | -1.10699200 |
| H                       | 4.83048300  | -0.80743000 | -1.19888400 |
| C                       | 4.30536000  | 2.80280100  | 0.10916800  |
| H                       | 2.46410500  | 2.07672400  | 0.95658100  |
| C                       | 5.43691000  | 2.48743800  | -0.64041600 |
| H                       | 6.49804300  | 0.93930300  | -1.70039500 |
| H                       | 4.15269400  | 3.81856900  | 0.46954600  |
| H                       | 6.17334300  | 3.25668000  | -0.86624500 |
| C                       | -3.47768200 | -0.83183000 | 0.51439900  |

|    |             |             |             |
|----|-------------|-------------|-------------|
| C  | -3.22412900 | -0.95172400 | 1.88375600  |
| C  | -4.71910300 | -1.24716300 | 0.01419200  |
| C  | -4.18724900 | -1.48884200 | 2.73536900  |
| H  | -2.26234400 | -0.62316400 | 2.27697800  |
| C  | -5.67482500 | -1.79550600 | 0.86275400  |
| H  | -4.94617000 | -1.13235400 | -1.04670700 |
| C  | -5.40885400 | -1.91889700 | 2.22576000  |
| H  | -3.97807200 | -1.57447700 | 3.80041000  |
| H  | -6.63186100 | -2.12390400 | 0.46070900  |
| H  | -6.15804200 | -2.34542300 | 2.89063400  |
| C  | -3.09949200 | 1.41700400  | -1.16041500 |
| C  | -3.60932700 | 1.56628700  | -2.45364200 |
| C  | -3.25584700 | 2.46214600  | -0.24046200 |
| C  | -4.27260100 | 2.73714600  | -2.81520500 |
| H  | -3.48148600 | 0.77588500  | -3.19111300 |
| C  | -3.91905700 | 3.62856200  | -0.60296800 |
| H  | -2.85007500 | 2.36062100  | 0.76711400  |
| C  | -4.43017800 | 3.76780800  | -1.89271300 |
| H  | -4.66363800 | 2.84324300  | -3.82579000 |
| H  | -4.03368900 | 4.43237400  | 0.12209500  |
| H  | -4.94880200 | 4.68146300  | -2.17832500 |
| H  | -3.15359900 | -1.57961800 | -2.35389100 |
| H  | -1.75163700 | -0.61912200 | -2.88990900 |
| Ru | 0.02245500  | -0.11922900 | 0.08185700  |
| H  | -0.38803000 | -1.20958000 | 1.21319000  |
| C  | 1.13876600  | -2.76699800 | -1.11941100 |
| H  | 0.85216900  | -3.31863800 | -0.21373400 |
| H  | 1.20923000  | -3.49265700 | -1.94594000 |
| C  | -1.20942200 | -2.34252100 | -1.74103100 |
| H  | -1.11828600 | -3.01773100 | -2.60680700 |
| H  | -1.56029500 | -2.93987500 | -0.88748800 |
| C  | 0.82765400  | 0.97577500  | -2.69062400 |
| H  | 1.69157900  | 1.69255100  | -2.64816900 |
| H  | 0.63508400  | 0.81958800  | -1.49310600 |
| O  | -0.33439100 | 1.72623500  | -3.07998200 |
| C  | -0.41420500 | 2.93768300  | -2.38270700 |
| H  | 0.46930300  | 3.57507000  | -2.56712100 |
| H  | -1.30861100 | 3.46936500  | -2.72289000 |
| H  | -0.49109200 | 2.77538700  | -1.28915800 |
| O  | 0.99908200  | -0.11821600 | -3.32827200 |
| H  | 0.42559200  | -1.22782700 | -2.26730200 |

-----  
**TSB6'**

-----  
Coordinates (Angstroms)

|   | X           | Y           | Z           |
|---|-------------|-------------|-------------|
| N | 0.08015200  | -1.84843700 | -1.33767800 |
| C | 2.43723700  | -2.14319200 | -0.83628300 |
| H | 2.73754700  | -1.68651200 | -1.78915600 |
| H | 3.22421700  | -2.84601600 | -0.53616500 |
| C | -2.17495200 | -1.25811200 | -1.99234600 |
| C | -0.09493100 | 1.11481700  | 1.46148800  |
| O | -0.13264200 | 1.96656900  | 2.27039500  |
| P | -2.24909500 | -0.16546300 | -0.50428200 |
| P | 2.22625700  | -0.76197300 | 0.38782500  |
| C | 2.93176400  | -1.39674900 | 1.95366200  |
| C | 4.24134300  | -1.89024200 | 2.01913300  |
| C | 2.15365300  | -1.37351700 | 3.11471300  |
| C | 4.75603500  | -2.36374200 | 3.22091400  |
| H | 4.86723400  | -1.89667100 | 1.12576200  |
| C | 2.67310100  | -1.84147300 | 4.31990600  |
| H | 1.13349100  | -0.99423700 | 3.05906600  |
| C | 3.97116100  | -2.33951300 | 4.37372500  |
| H | 5.77398000  | -2.74816100 | 3.26073000  |
| H | 2.05850300  | -1.81793300 | 5.21810700  |
| H | 4.37624200  | -2.70781500 | 5.31475600  |
| C | 3.44146300  | 0.49063700  | -0.15981900 |
| C | 4.61245900  | 0.16423800  | -0.85506800 |
| C | 3.16071300  | 1.83875600  | 0.09664800  |
| C | 5.48415900  | 1.16363600  | -1.27973600 |
| H | 4.84374100  | -0.87735100 | -1.07966100 |
| C | 4.03684700  | 2.83609900  | -0.31996200 |
| H | 2.23292200  | 2.10385500  | 0.60528700  |
| C | 5.19893700  | 2.50021900  | -1.01118100 |
| H | 6.38559800  | 0.89653400  | -1.82883800 |
| H | 3.80288500  | 3.87974800  | -0.11623200 |
| H | 5.87848000  | 3.28055100  | -1.34960500 |
| C | -3.60262400 | -0.90338800 | 0.49417800  |
| C | -3.35716100 | -1.39823900 | 1.77674500  |
| C | -4.90101100 | -0.97978000 | -0.03007100 |
| C | -4.38871200 | -1.97104900 | 2.51917600  |
| H | -2.34657800 | -1.33361000 | 2.18085400  |
| C | -5.92769300 | -1.55549100 | 0.70916100  |
| H | -5.11096400 | -0.57746300 | -1.02252300 |
| C | -5.67171800 | -2.05378100 | 1.98633100  |
| H | -4.18672800 | -2.35299500 | 3.51868800  |
| H | -6.93130700 | -1.61319000 | 0.29061600  |
| H | -6.47620600 | -2.50342100 | 2.56620900  |
| C | -3.02446700 | 1.38757400  | -1.07097000 |

|    |             |             |             |
|----|-------------|-------------|-------------|
| C  | -3.43074800 | 1.61147200  | -2.39018800 |
| C  | -3.20034600 | 2.40686900  | -0.12437600 |
| C  | -4.00378100 | 2.82874000  | -2.75405900 |
| H  | -3.29662300 | 0.83990500  | -3.14624300 |
| C  | -3.77508000 | 3.61901300  | -0.48820800 |
| H  | -2.87961400 | 2.24753900  | 0.90601800  |
| C  | -4.17778800 | 3.83303000  | -1.80614500 |
| H  | -4.31346600 | 2.99011200  | -3.78546300 |
| H  | -3.90564200 | 4.40054400  | 0.25826700  |
| H  | -4.62502500 | 4.78336600  | -2.09322000 |
| H  | -3.16635200 | -1.61285700 | -2.30192000 |
| H  | -1.74447200 | -0.67019300 | -2.81630200 |
| Ru | -0.02668400 | -0.23112700 | 0.20243500  |
| H  | -0.38648600 | -1.41450400 | 1.33384500  |
| C  | 1.10874100  | -2.85496400 | -1.02703900 |
| H  | 0.80280300  | -3.38738000 | -0.11755700 |
| H  | 1.18502600  | -3.59250900 | -1.84273300 |
| C  | -1.23596800 | -2.41157000 | -1.68279000 |
| H  | -1.14907800 | -3.08428300 | -2.55101700 |
| H  | -1.59321800 | -3.00680100 | -0.83102700 |
| C  | 0.84350600  | 1.03454200  | -2.66054400 |
| H  | 1.75034400  | 1.57992800  | -2.31327400 |
| H  | 0.41318700  | 0.77940900  | -1.19039400 |
| O  | -0.17063500 | 1.90827800  | -2.99560600 |
| C  | -0.18935700 | 3.07351800  | -2.19570800 |
| H  | 0.78237400  | 3.59269800  | -2.21965400 |
| H  | -0.95996600 | 3.73249600  | -2.60280000 |
| H  | -0.42874700 | 2.82338800  | -1.14884300 |
| O  | 0.93133700  | -0.03732200 | -3.28358000 |
| H  | 0.40565800  | -1.31277500 | -2.16454000 |

**B7**

| -----                   |             |             |             |
|-------------------------|-------------|-------------|-------------|
| Coordinates (Angstroms) |             |             |             |
|                         | X           | Y           | Z           |
| -----                   |             |             |             |
| N                       | -0.03219600 | -0.90363500 | -1.48166400 |
| C                       | 2.40792200  | -1.01282000 | -1.36707200 |
| H                       | 2.49765800  | -0.26690800 | -2.16904100 |
| H                       | 3.29412300  | -1.65514500 | -1.44261700 |
| C                       | -2.46592400 | -0.62495700 | -1.46621200 |
| C                       | 0.17262800  | 1.64696700  | 1.73993600  |
| O                       | 0.25254300  | 2.37990600  | 2.65448100  |
| P                       | -2.22516500 | 0.54652000  | -0.04243400 |
| P                       | 2.31742300  | -0.07082700 | 0.22317400  |
| C                       | 2.95833900  | -1.21046200 | 1.50721600  |

|   |             |             |             |
|---|-------------|-------------|-------------|
| C | 2.65600700  | -0.91061100 | 2.84258000  |
| C | 3.72543700  | -2.34785300 | 1.23230300  |
| C | 3.11749400  | -1.71930100 | 3.87411700  |
| H | 2.03585000  | -0.04301200 | 3.06932600  |
| C | 4.17431000  | -3.16825100 | 2.26594000  |
| H | 3.97465500  | -2.61135800 | 0.20514800  |
| C | 3.87458300  | -2.85443900 | 3.58784700  |
| H | 2.87352700  | -1.46984400 | 4.90518600  |
| H | 4.76053900  | -4.05588100 | 2.03315700  |
| H | 4.22473300  | -3.49619000 | 4.39468300  |
| C | 3.65562200  | 1.17020700  | 0.07993100  |
| C | 5.00488800  | 0.79429400  | 0.04268600  |
| C | 3.32131900  | 2.52539300  | -0.00502800 |
| C | 5.99924200  | 1.75716800  | -0.09347000 |
| H | 5.28032100  | -0.25781700 | 0.12952700  |
| C | 4.31976200  | 3.48819700  | -0.13539900 |
| H | 2.27055300  | 2.81496800  | 0.02319100  |
| C | 5.65713800  | 3.10619900  | -0.18164400 |
| H | 7.04496500  | 1.45557200  | -0.12463400 |
| H | 4.04853200  | 4.54064300  | -0.19798700 |
| H | 6.43682800  | 3.85948400  | -0.28273500 |
| C | -3.33516000 | -0.09219100 | 1.27428200  |
| C | -2.87282200 | -0.11820100 | 2.59413800  |
| C | -4.63964900 | -0.52701200 | 1.00835600  |
| C | -3.69790000 | -0.56187200 | 3.62451100  |
| H | -1.85129200 | 0.19561900  | 2.80431300  |
| C | -5.45951300 | -0.98285700 | 2.03561300  |
| H | -5.02697100 | -0.51285200 | -0.01039000 |
| C | -4.99007700 | -0.99842900 | 3.34760400  |
| H | -3.32372800 | -0.57394000 | 4.64676500  |
| H | -6.46856400 | -1.32490700 | 1.81065800  |
| H | -5.63234300 | -1.35279100 | 4.15229000  |
| C | -3.08889400 | 2.06855200  | -0.59047000 |
| C | -2.51383200 | 3.30681800  | -0.28384000 |
| C | -4.30866200 | 2.04001800  | -1.28021600 |
| C | -3.15912300 | 4.49099300  | -0.63033500 |
| H | -1.54695400 | 3.33334500  | 0.21865500  |
| C | -4.94899300 | 3.22418500  | -1.63360500 |
| H | -4.76562000 | 1.08572000  | -1.54588100 |
| C | -4.37890200 | 4.45228500  | -1.30099200 |
| H | -2.70004800 | 5.44687300  | -0.38290900 |
| H | -5.89605900 | 3.18835700  | -2.17012900 |
| H | -4.88347800 | 5.37811400  | -1.57344700 |
| H | -3.42687100 | -1.15171500 | -1.41275300 |

|    |             |             |             |
|----|-------------|-------------|-------------|
| H  | -2.48074900 | -0.02542500 | -2.38762300 |
| Ru | 0.07213900  | 0.51498700  | 0.29659500  |
| H  | -0.18103400 | -0.88318200 | 1.23795100  |
| C  | 1.12879900  | -1.81171700 | -1.53563200 |
| H  | 1.01229900  | -2.53840900 | -0.71997100 |
| H  | 1.13578800  | -2.37086000 | -2.48526200 |
| C  | -1.32045500 | -1.61883700 | -1.50628700 |
| H  | -1.39260100 | -2.25727900 | -2.40228500 |
| H  | -1.34329500 | -2.27004800 | -0.62329200 |
| H  | 0.01629600  | -0.28742300 | -2.30151700 |
| H  | 0.31308200  | 1.85436200  | -0.78082300 |
| C  | -0.67588000 | 2.11901300  | -3.67652600 |
| H  | -1.56086800 | 1.82193600  | -3.06762400 |
| H  | -0.85569400 | 1.80597000  | -4.72162700 |
| O  | -0.52910400 | 3.51232300  | -3.59246900 |
| C  | -1.70130100 | 4.15949100  | -4.01114100 |
| H  | -2.59152700 | 3.79137300  | -3.47192300 |
| H  | -1.58215300 | 5.22685100  | -3.80342600 |
| H  | -1.87989700 | 4.02567700  | -5.09328900 |
| O  | 0.48324200  | 1.50089700  | -3.25523800 |
| H  | 0.55547000  | 1.69800100  | -2.27885800 |

-----  
**TSB7**  
-----

**Coordinates (Angstroms)**

|   | <b>X</b>    | <b>Y</b>    | <b>Z</b>    |
|---|-------------|-------------|-------------|
| N | 0.03174800  | -0.94727500 | -1.36989100 |
| C | 2.43369500  | -1.26402900 | -1.14453400 |
| H | 2.59997900  | -0.62468700 | -2.02149800 |
| H | 3.25908900  | -1.98396800 | -1.07420900 |
| C | -2.37392400 | -0.54153300 | -1.60909000 |
| C | 0.06197600  | 1.53166500  | 1.85709700  |
| O | 0.02021500  | 2.11641000  | 2.87029000  |
| P | -2.21661700 | 0.54017200  | -0.12761000 |
| P | 2.33985000  | -0.16326800 | 0.33076700  |
| C | 2.99044900  | -1.17278700 | 1.71197800  |
| C | 2.22345500  | -1.40926200 | 2.85610700  |
| C | 4.27839400  | -1.71998700 | 1.62815600  |
| C | 2.73188700  | -2.18891200 | 3.89366900  |
| H | 1.22367100  | -0.98195100 | 2.92843300  |
| C | 4.78175600  | -2.50087700 | 2.66123500  |
| H | 4.89482000  | -1.52465700 | 0.74939900  |
| C | 4.00711000  | -2.73778900 | 3.79634600  |
| H | 2.12628200  | -2.36803300 | 4.78038100  |
| H | 5.78217400  | -2.92331500 | 2.58350300  |



|    |             |             |             |
|----|-------------|-------------|-------------|
| H  | 4.40177500  | -3.34840400 | 4.60685300  |
| C  | 3.65383500  | 1.08058300  | 0.08556000  |
| C  | 4.64682400  | 0.93834000  | -0.88973600 |
| C  | 3.66728300  | 2.21419000  | 0.90926900  |
| C  | 5.63488800  | 1.90886000  | -1.03695900 |
| H  | 4.65195600  | 0.06804600  | -1.54432100 |
| C  | 4.65869300  | 3.17877300  | 0.76501000  |
| H  | 2.89067800  | 2.34199800  | 1.66474000  |
| C  | 5.64379000  | 3.02800100  | -0.20963500 |
| H  | 6.39842200  | 1.78848400  | -1.80343700 |
| H  | 4.65805500  | 4.05510600  | 1.41067400  |
| H  | 6.41473200  | 3.78736100  | -0.32779400 |
| C  | -3.31294900 | -0.17802700 | 1.14545700  |
| C  | -3.63751300 | 0.59646200  | 2.26727800  |
| C  | -3.79229800 | -1.48922300 | 1.06706200  |
| C  | -4.43637700 | 0.07504900  | 3.27829600  |
| H  | -3.26647400 | 1.61962600  | 2.34284800  |
| C  | -4.59143000 | -2.01063300 | 2.08198900  |
| H  | -3.54296700 | -2.11504600 | 0.21102600  |
| C  | -4.91720100 | -1.23040600 | 3.18733300  |
| H  | -4.68573600 | 0.69054300  | 4.14084800  |
| H  | -4.96126800 | -3.03188300 | 2.00511700  |
| H  | -5.54428900 | -1.63803200 | 3.97840200  |
| C  | -3.07649300 | 2.09297300  | -0.55423500 |
| C  | -2.44412700 | 3.31999900  | -0.33536500 |
| C  | -4.37085700 | 2.07466200  | -1.08989300 |
| C  | -3.09551500 | 4.51199200  | -0.64385200 |
| H  | -1.43265000 | 3.33716600  | 0.07291200  |
| C  | -5.01640700 | 3.26533100  | -1.40634000 |
| H  | -4.87870300 | 1.12351500  | -1.25545400 |
| C  | -4.37940900 | 4.48561300  | -1.18194200 |
| H  | -2.59465800 | 5.46256300  | -0.46885400 |
| H  | -6.02055200 | 3.24206200  | -1.82659000 |
| H  | -4.88801300 | 5.41687700  | -1.42631700 |
| H  | -3.36843800 | -0.99632600 | -1.69961400 |
| H  | -2.23080100 | 0.12584400  | -2.46815300 |
| Ru | 0.08409700  | 0.48369900  | 0.31288800  |
| H  | -0.24311100 | -0.78210800 | 1.23949400  |
| C  | 1.09112600  | -1.95599100 | -1.29641600 |
| H  | 0.90699400  | -2.64351900 | -0.45224700 |
| H  | 1.09329800  | -2.56773200 | -2.21607100 |
| C  | -1.26923300 | -1.58399700 | -1.57431500 |
| H  | -1.26577100 | -2.15411200 | -2.52072400 |
| H  | -1.45478100 | -2.31437800 | -0.76623100 |

|   |             |             |             |
|---|-------------|-------------|-------------|
| H | 0.32976100  | -0.19437000 | -2.30876400 |
| H | 0.59113800  | 2.16705500  | -0.65226700 |
| C | -0.18545500 | 1.11280400  | -3.92699000 |
| H | -0.90177800 | 0.34022000  | -4.32923700 |
| H | 0.19306400  | 1.67615400  | -4.81255600 |
| O | -1.00750400 | 2.04397100  | -3.16663000 |
| C | -2.06962300 | 2.52746700  | -3.93313100 |
| H | -2.78068100 | 1.72696800  | -4.22136100 |
| H | -2.60968900 | 3.27449600  | -3.34043500 |
| H | -1.72037600 | 3.00628400  | -4.86727800 |
| O | 0.79401300  | 0.62535100  | -3.17296600 |
| H | 0.51254000  | 1.77665100  | -1.33147300 |

**B8**

**Coordinates (Angstroms)**

|   | <b>X</b>    | <b>Y</b>    | <b>Z</b>    |
|---|-------------|-------------|-------------|
| N | -0.21720300 | -1.61076900 | -0.91211600 |
| C | 2.15177400  | -2.02632000 | -0.53800400 |
| H | 2.45686100  | -1.79047300 | -1.56720400 |
| H | 2.89756900  | -2.71543900 | -0.12088000 |
| C | -2.57287800 | -1.18492700 | -1.36049600 |
| C | -0.11885200 | 1.67436900  | 1.42008200  |
| O | -0.10696600 | 2.57839600  | 2.17307400  |
| P | -2.46905200 | 0.02953500  | 0.01504900  |
| P | 2.08159400  | -0.42864500 | 0.39521300  |
| C | 2.91467800  | -0.75849500 | 1.99210200  |
| C | 4.20682000  | -1.29796100 | 2.03521100  |
| C | 2.25907600  | -0.46823100 | 3.19221500  |
| C | 4.82665800  | -1.55009400 | 3.25375300  |
| H | 4.73609900  | -1.51907600 | 1.10717500  |
| C | 2.88273800  | -0.71811600 | 4.41311100  |
| H | 1.25260700  | -0.05158200 | 3.16189000  |
| C | 4.16345600  | -1.26078000 | 4.44587500  |
| H | 5.83063000  | -1.97117800 | 3.27479200  |
| H | 2.36158600  | -0.48838300 | 5.34101300  |
| H | 4.64916900  | -1.45716800 | 5.40043500  |
| C | 3.27663500  | 0.64666600  | -0.49064400 |
| C | 4.34533500  | 0.14511800  | -1.24657900 |
| C | 3.08560200  | 2.03343700  | -0.43183900 |
| C | 5.20496700  | 1.01054100  | -1.91905300 |
| H | 4.51192100  | -0.93066900 | -1.31181000 |
| C | 3.94382700  | 2.89752100  | -1.10467800 |
| H | 2.23872100  | 2.42934700  | 0.13023000  |
| C | 5.00507000  | 2.38762600  | -1.84961200 |

|    |             |             |             |
|----|-------------|-------------|-------------|
| H  | 6.03325900  | 0.60700500  | -2.49993100 |
| H  | 3.77709200  | 3.97202800  | -1.05384900 |
| H  | 5.67423300  | 3.06325500  | -2.38003400 |
| C  | -3.45943600 | -0.65845500 | 1.38961000  |
| C  | -3.30316500 | -0.07012200 | 2.65231000  |
| C  | -4.36247500 | -1.71678200 | 1.24587900  |
| C  | -4.04602600 | -0.51668600 | 3.73877200  |
| H  | -2.58297500 | 0.73939700  | 2.77978100  |
| C  | -5.09750600 | -2.17278600 | 2.33916600  |
| H  | -4.49569400 | -2.19827900 | 0.27798200  |
| C  | -4.94484900 | -1.57130900 | 3.58470600  |
| H  | -3.91608600 | -0.04678100 | 4.71216200  |
| H  | -5.79234400 | -3.00186400 | 2.21348300  |
| H  | -5.52102300 | -1.92699800 | 4.43731600  |
| C  | -3.47402300 | 1.45828300  | -0.52906100 |
| C  | -2.84894000 | 2.68974500  | -0.74953600 |
| C  | -4.85530200 | 1.34497400  | -0.73540700 |
| C  | -3.59247800 | 3.78882300  | -1.17431600 |
| H  | -1.77481900 | 2.77838100  | -0.58773700 |
| C  | -5.59487600 | 2.44239600  | -1.16224800 |
| H  | -5.35604500 | 0.39380100  | -0.54769700 |
| C  | -4.96342000 | 3.66649700  | -1.38165300 |
| H  | -3.09755800 | 4.74445700  | -1.33949700 |
| H  | -6.66817900 | 2.34524900  | -1.31869500 |
| H  | -5.54480600 | 4.52694000  | -1.70909500 |
| H  | -3.57590500 | -1.60867200 | -1.50231900 |
| H  | -2.32255000 | -0.62494500 | -2.27267000 |
| Ru | -0.16922300 | 0.15866900  | 0.32949100  |
| H  | -0.36804600 | -0.74810700 | 1.62757900  |
| C  | 0.75313000  | -2.62317600 | -0.55099500 |
| H  | 0.54046200  | -3.08996200 | 0.43665000  |
| H  | 0.73204600  | -3.45833600 | -1.28080500 |
| C  | -1.51042200 | -2.23789600 | -1.09519900 |
| H  | -1.47908200 | -2.95206400 | -1.94337200 |
| H  | -1.81877200 | -2.84704200 | -0.21240600 |
| C  | 0.82074100  | 0.88032200  | -2.56239400 |
| O  | 0.09712500  | 1.44692900  | -1.76713400 |
| H  | 1.05747500  | -0.20062100 | -2.48832400 |
| O  | 1.35028400  | 1.52749900  | -3.59481500 |
| C  | 2.19229500  | 0.76845200  | -4.46742900 |
| H  | 1.66153500  | 0.59028400  | -5.40768000 |
| H  | 3.08909700  | 1.36271400  | -4.65582300 |
| H  | 2.47297100  | -0.18984400 | -4.01374400 |

---

**TSB8**

|   | Coordinates (Angstroms) |             |             |
|---|-------------------------|-------------|-------------|
|   | X                       | Y           | Z           |
| N | -0.14635800             | -1.36892900 | -1.18077300 |
| C | 2.27048800              | -1.60187500 | -1.06661500 |
| H | 2.41338100              | -1.06283000 | -2.01420500 |
| H | 3.12745600              | -2.27972500 | -0.96190800 |
| C | -2.52613600             | -0.94082100 | -1.41427600 |
| C | 0.09483100              | 1.79297100  | 1.36075800  |
| O | 0.16252000              | 2.69954300  | 2.10325700  |
| P | -2.34023100             | 0.25034900  | -0.01732200 |
| P | 2.21780700              | -0.30176900 | 0.24204000  |
| C | 2.84749800              | -1.07883400 | 1.77008400  |
| C | 2.92161400              | -0.27642000 | 2.91772500  |
| C | 3.22978900              | -2.42039300 | 1.85832400  |
| C | 3.38897000              | -0.79898400 | 4.11719500  |
| H | 2.60621400              | 0.76653900  | 2.86636900  |
| C | 3.69092400              | -2.94552100 | 3.06495200  |
| H | 3.17016300              | -3.07003600 | 0.98647600  |
| C | 3.77504700              | -2.13686000 | 4.19364900  |
| H | 3.44490500              | -0.16206900 | 4.99815200  |
| H | 3.98469300              | -3.99257000 | 3.11863600  |
| H | 4.13722900              | -2.54762800 | 5.13441700  |
| C | 3.56428400              | 0.84590400  | -0.21725900 |
| C | 4.91236600              | 0.48500600  | -0.09190500 |
| C | 3.23446100              | 2.10330800  | -0.73465300 |
| C | 5.91335800              | 1.36569500  | -0.48704900 |
| H | 5.17866700              | -0.48773000 | 0.32387100  |
| C | 4.24063000              | 2.98260000  | -1.12905600 |
| H | 2.18555400              | 2.38158300  | -0.83606000 |
| C | 5.57777900              | 2.61584000  | -1.00573900 |
| H | 6.95894500              | 1.07844700  | -0.38666800 |
| H | 3.97569600              | 3.95954800  | -1.52983400 |
| H | 6.36317000              | 3.30559900  | -1.31118300 |
| C | -3.30159900             | -0.44340100 | 1.37577000  |
| C | -2.98758800             | -0.00193000 | 2.66818700  |
| C | -4.34354500             | -1.36329000 | 1.21276300  |
| C | -3.71239300             | -0.45255000 | 3.76585500  |
| H | -2.16209600             | 0.69593500  | 2.81002100  |
| C | -5.06079300             | -1.82433000 | 2.31476600  |
| H | -4.60408400             | -1.73025100 | 0.22041700  |
| C | -4.74923000             | -1.36732200 | 3.59188100  |
| H | -3.45775700             | -0.09726700 | 4.76293300  |
| H | -5.86386000             | -2.54577200 | 2.17260400  |

|    |             |             |             |
|----|-------------|-------------|-------------|
| H  | -5.31075100 | -1.72717800 | 4.45241500  |
| C  | -3.32539000 | 1.70441400  | -0.52579200 |
| C  | -2.66415600 | 2.90042900  | -0.82484300 |
| C  | -4.72112500 | 1.64688000  | -0.63108800 |
| C  | -3.38976100 | 4.02058600  | -1.22470800 |
| H  | -1.57809300 | 2.94399400  | -0.74927100 |
| C  | -5.44219400 | 2.76586900  | -1.03305900 |
| H  | -5.24836600 | 0.72497800  | -0.38154700 |
| C  | -4.77630400 | 3.95463700  | -1.32916200 |
| H  | -2.86679800 | 4.94801500  | -1.45208600 |
| H  | -6.52707300 | 2.71328000  | -1.10914000 |
| H  | -5.34262000 | 4.83249900  | -1.63595600 |
| H  | -3.53406900 | -1.36726100 | -1.49335400 |
| H  | -2.35882500 | -0.35455000 | -2.32930300 |
| Ru | -0.02335600 | 0.33608000  | 0.21925600  |
| H  | -0.20895500 | -0.61586700 | 1.49906600  |
| C  | 0.94001000  | -2.34010800 | -1.09516900 |
| H  | 0.82481300  | -2.97348900 | -0.19739500 |
| H  | 0.91348500  | -3.02183800 | -1.96636800 |
| C  | -1.45298300 | -2.01103500 | -1.28553300 |
| H  | -1.48298200 | -2.67766800 | -2.16798400 |
| H  | -1.64658800 | -2.64813900 | -0.40376500 |
| C  | 0.24611900  | 0.67336000  | -2.80247500 |
| O  | 0.20881500  | 1.51214900  | -1.88694600 |
| H  | 0.04283400  | -0.62062000 | -2.21223200 |
| O  | 0.44125700  | 1.20550200  | -4.03854800 |
| C  | 0.48481500  | 0.25824300  | -5.09546500 |
| H  | -0.33965900 | 0.45509300  | -5.79070900 |
| H  | 1.43506000  | 0.36600800  | -5.63025900 |
| H  | 0.39801900  | -0.76567700 | -4.70655700 |

**B9**

| -----                   |             |             |             |
|-------------------------|-------------|-------------|-------------|
| Coordinates (Angstroms) |             |             |             |
|                         | X           | Y           | Z           |
| -----                   |             |             |             |
| N                       | -0.16483300 | -1.47629300 | -1.14872300 |
| C                       | 2.25259300  | -1.64550600 | -1.04263000 |
| H                       | 2.32959400  | -1.11699700 | -2.00441800 |
| H                       | 3.13012400  | -2.29972300 | -0.97235300 |
| C                       | -2.54223200 | -1.02983600 | -1.35395900 |
| C                       | 0.07555800  | 1.79195100  | 1.29506400  |
| O                       | 0.13438100  | 2.71859100  | 2.01131300  |
| P                       | -2.35815400 | 0.22481900  | -0.00883900 |
| P                       | 2.22161300  | -0.32461500 | 0.24802900  |
| C                       | 2.80282700  | -1.10917200 | 1.79329400  |

|   |             |             |             |
|---|-------------|-------------|-------------|
| C | 2.57493500  | -0.42396000 | 2.99462100  |
| C | 3.46805500  | -2.33907800 | 1.83664900  |
| C | 3.01715700  | -0.94692100 | 4.20413300  |
| H | 2.03547400  | 0.52344000  | 2.97863800  |
| C | 3.89804100  | -2.86994600 | 3.05160800  |
| H | 3.65991500  | -2.89621000 | 0.92066900  |
| C | 3.67749500  | -2.17417900 | 4.23596300  |
| H | 2.83530700  | -0.39915400 | 5.12716100  |
| H | 4.40946500  | -3.83114900 | 3.06842200  |
| H | 4.01599300  | -2.58825100 | 5.18407200  |
| C | 3.60340400  | 0.77512100  | -0.22440500 |
| C | 4.93242200  | 0.46701200  | 0.09305800  |
| C | 3.31969300  | 1.93835300  | -0.95117900 |
| C | 5.96364800  | 1.30498000  | -0.31858900 |
| H | 5.16015700  | -0.42787300 | 0.67312500  |
| C | 4.35711300  | 2.77143100  | -1.36277300 |
| H | 2.28627700  | 2.17907200  | -1.20157000 |
| C | 5.67690400  | 2.45745800  | -1.04808600 |
| H | 6.99391800  | 1.05952300  | -0.06602100 |
| H | 4.12890800  | 3.67282100  | -1.92896600 |
| H | 6.48517700  | 3.11367300  | -1.36731900 |
| C | -3.27982700 | -0.43869900 | 1.42344300  |
| C | -2.92884700 | 0.01927600  | 2.70025500  |
| C | -4.32681900 | -1.35976100 | 1.30235800  |
| C | -3.61783400 | -0.42126200 | 3.82499000  |
| H | -2.10030600 | 0.71919300  | 2.80889700  |
| C | -5.00810000 | -1.81048100 | 2.43103000  |
| H | -4.62349300 | -1.73124000 | 0.32202500  |
| C | -4.65677200 | -1.34047800 | 3.69316500  |
| H | -3.33416800 | -0.05295500 | 4.80936100  |
| H | -5.81589800 | -2.53215000 | 2.32071200  |
| H | -5.18998800 | -1.69235600 | 4.57474800  |
| C | -3.36749400 | 1.64179400  | -0.56876200 |
| C | -2.72879700 | 2.67128000  | -1.27330900 |
| C | -4.74353400 | 1.72711300  | -0.32288200 |
| C | -3.46422900 | 3.75978600  | -1.73478300 |
| H | -1.65631900 | 2.60799400  | -1.46188700 |
| C | -5.47158700 | 2.81978300  | -0.78357800 |
| H | -5.24740900 | 0.94239200  | 0.24130800  |
| C | -4.83325600 | 3.83692800  | -1.49034000 |
| H | -2.96001800 | 4.55550800  | -2.28035800 |
| H | -6.54039200 | 2.87976700  | -0.58378300 |
| H | -5.40372200 | 4.69438800  | -1.84398100 |
| H | -3.55462300 | -1.44690000 | -1.42188500 |

|    |             |             |             |
|----|-------------|-------------|-------------|
| H  | -2.35553900 | -0.48957100 | -2.29397500 |
| Ru | -0.02963600 | 0.31799700  | 0.19284900  |
| H  | -0.21104100 | -0.61260800 | 1.50315400  |
| C  | 0.94876400  | -2.42423500 | -1.00256500 |
| H  | 0.82874800  | -2.95991900 | -0.04984700 |
| H  | 0.92274500  | -3.17303100 | -1.81113700 |
| C  | -1.48973900 | -2.11070300 | -1.17621700 |
| H  | -1.54734300 | -2.84381800 | -1.99748200 |
| H  | -1.63445300 | -2.65785800 | -0.23337900 |
| C  | 0.25511000  | 0.77269600  | -2.86935100 |
| O  | 0.21902700  | 1.45376700  | -1.81179700 |
| H  | -0.03047700 | -0.95919800 | -2.05648200 |
| O  | 0.44352400  | 1.61250400  | -3.95076300 |
| C  | 0.50900900  | 0.94934200  | -5.19644100 |
| H  | -0.26484000 | 1.34716700  | -5.86543300 |
| H  | 1.49118400  | 1.12114000  | -5.65630300 |
| H  | 0.35512700  | -0.13039600 | -5.06015800 |

**TSB9**

**Coordinates (Angstroms)**

|   | <b>X</b>    | <b>Y</b>    | <b>Z</b>    |
|---|-------------|-------------|-------------|
| N | 0.09635000  | -1.55553600 | -1.15190900 |
| C | 2.52635100  | -1.57062200 | -0.93287000 |
| H | 2.65827600  | -1.04341300 | -1.88814800 |
| H | 3.41178000  | -2.19923500 | -0.77208900 |
| C | -2.32243000 | -1.30672400 | -1.41685500 |
| C | -0.04587200 | 1.54356200  | 1.54110800  |
| O | -0.11384100 | 2.35499900  | 2.38432900  |
| P | -2.24357800 | 0.03410500  | -0.14262500 |
| P | 2.33633800  | -0.27045400 | 0.37115500  |
| C | 2.99374300  | -1.06152700 | 1.88909700  |
| C | 4.25324000  | -1.67607100 | 1.89353100  |
| C | 2.24939400  | -1.03286900 | 3.07247300  |
| C | 4.74981000  | -2.26256700 | 3.05221900  |
| H | 4.85706500  | -1.68757800 | 0.98513100  |
| C | 2.75043400  | -1.61507100 | 4.23516000  |
| H | 1.27120200  | -0.55341800 | 3.07471700  |
| C | 3.99720000  | -2.23347000 | 4.22586600  |
| H | 5.72825500  | -2.73987000 | 3.04161600  |
| H | 2.16125300  | -1.58500100 | 5.15001700  |
| H | 4.38698300  | -2.69091400 | 5.13365600  |
| C | 3.60935300  | 0.96676700  | -0.04265800 |
| C | 4.77543500  | 0.63627600  | -0.74357300 |
| C | 3.41816900  | 2.28668000  | 0.38032600  |

|    |             |             |             |
|----|-------------|-------------|-------------|
| C  | 5.73724600  | 1.60787600  | -1.00748700 |
| H  | 4.93614800  | -0.38413000 | -1.09217600 |
| C  | 4.38333300  | 3.25405000  | 0.12169500  |
| H  | 2.49544900  | 2.55783400  | 0.89155500  |
| C  | 5.54368800  | 2.91641300  | -0.57169700 |
| H  | 6.63828700  | 1.34144400  | -1.55757700 |
| H  | 4.22109400  | 4.27884500  | 0.45038300  |
| H  | 6.29461100  | 3.67643100  | -0.78084500 |
| C  | -3.29357800 | -0.53262100 | 1.24047400  |
| C  | -3.65410600 | 0.40104200  | 2.22199900  |
| C  | -3.69114900 | -1.86424700 | 1.39587700  |
| C  | -4.40566000 | 0.01210300  | 3.32475600  |
| H  | -3.34542500 | 1.44209600  | 2.11774300  |
| C  | -4.44272200 | -2.25269500 | 2.50325400  |
| H  | -3.41726300 | -2.61254400 | 0.65287700  |
| C  | -4.80274300 | -1.31675200 | 3.46813700  |
| H  | -4.68193500 | 0.74979100  | 4.07598100  |
| H  | -4.74831700 | -3.29237100 | 2.60878900  |
| H  | -5.39044000 | -1.62110000 | 4.33233300  |
| C  | -3.22069300 | 1.39312100  | -0.86454900 |
| C  | -2.61931400 | 2.63734500  | -1.07626100 |
| C  | -4.55965600 | 1.19819200  | -1.23328300 |
| C  | -3.34862200 | 3.67182900  | -1.66031800 |
| H  | -1.57184700 | 2.78256900  | -0.81142700 |
| C  | -5.28070700 | 2.23125900  | -1.82047000 |
| H  | -5.03961500 | 0.23549000  | -1.05167000 |
| C  | -4.67328400 | 3.46922600  | -2.03520700 |
| H  | -2.87153700 | 4.63509300  | -1.83045400 |
| H  | -6.31888700 | 2.07377600  | -2.10836200 |
| H  | -5.23872800 | 4.27791900  | -2.49563100 |
| H  | -3.29078100 | -1.82355800 | -1.42244100 |
| H  | -2.22607600 | -0.79850600 | -2.38637300 |
| Ru | 0.04069000  | 0.21743200  | 0.26338400  |
| H  | -0.21513000 | -0.87517900 | 1.40681500  |
| C  | 1.26891100  | -2.42029000 | -0.98129600 |
| H  | 1.13980600  | -2.97944800 | -0.04305900 |
| H  | 1.33285300  | -3.15758400 | -1.79822800 |
| C  | -1.17369300 | -2.28469600 | -1.23492900 |
| H  | -1.15350500 | -3.00959000 | -2.06557700 |
| H  | -1.28622200 | -2.85746100 | -0.30313800 |
| C  | 0.28556900  | 1.28739500  | -2.12658300 |
| O  | 0.77633900  | 2.11494500  | -1.34302300 |
| H  | 0.21597800  | -0.94245100 | -1.97944600 |
| O  | -0.43201300 | 1.94498300  | -3.17102900 |



|   |             |            |             |
|---|-------------|------------|-------------|
| C | -1.07405700 | 1.09529100 | -4.08028900 |
| H | -2.16810800 | 1.11891700 | -3.93903200 |
| H | -0.85730300 | 1.41837700 | -5.10760100 |
| H | -0.72395100 | 0.05380300 | -3.96159900 |

---

**B10**

---

**Coordinates (Angstroms)**

|   | <b>X</b>    | <b>Y</b>    | <b>Z</b>    |
|---|-------------|-------------|-------------|
| N | -0.00783300 | -1.10876000 | -1.40600500 |
| C | 2.43403000  | -1.10558100 | -1.22896100 |
| H | 2.50310800  | -0.44514200 | -2.10561300 |
| H | 3.33925900  | -1.72694400 | -1.21364300 |
| C | -2.47030500 | -1.00004600 | -1.32871100 |
| C | -0.03279100 | 1.42657300  | 1.85362600  |
| O | -0.05778800 | 2.02668700  | 2.85735600  |
| P | -2.30006500 | 0.32377800  | -0.01934400 |
| P | 2.29741800  | -0.03235800 | 0.27369100  |
| C | 3.02920300  | -1.06499400 | 1.60384100  |
| C | 4.32834400  | -1.57287100 | 1.46702000  |
| C | 2.31210000  | -1.33803700 | 2.77123800  |
| C | 4.88996800  | -2.35627700 | 2.46842600  |
| H | 4.91046700  | -1.34169400 | 0.57322500  |
| C | 2.88100000  | -2.11301400 | 3.78054100  |
| H | 1.30035800  | -0.94759700 | 2.87614500  |
| C | 4.16507800  | -2.62774700 | 3.62836400  |
| H | 5.89782200  | -2.75054600 | 2.34799600  |
| H | 2.31452300  | -2.31676800 | 4.68777200  |
| H | 4.60667500  | -3.23663700 | 4.41573000  |
| C | 3.59589800  | 1.22769200  | 0.03715800  |
| C | 4.57516600  | 1.12116100  | -0.95676300 |
| C | 3.62244300  | 2.32869500  | 0.90279300  |
| C | 5.56335900  | 2.09428400  | -1.08319500 |
| H | 4.57834600  | 0.27236300  | -1.63963900 |
| C | 4.61426600  | 3.29522600  | 0.77883300  |
| H | 2.84676100  | 2.43835500  | 1.65908800  |
| C | 5.58515900  | 3.18120300  | -0.21452400 |
| H | 6.31821100  | 1.99958000  | -1.86222900 |
| H | 4.61886500  | 4.15042200  | 1.45222800  |
| H | 6.35495600  | 3.94456500  | -0.31489000 |
| C | -3.40030000 | -0.26048400 | 1.32813000  |
| C | -4.53405500 | 0.45772500  | 1.72392000  |
| C | -3.10253200 | -1.46558200 | 1.97846900  |
| C | -5.35860700 | -0.02552900 | 2.73746900  |
| H | -4.77994200 | 1.40152100  | 1.24071000  |

|    |             |             |             |
|----|-------------|-------------|-------------|
| C  | -3.93618600 | -1.95347600 | 2.97883700  |
| H  | -2.19629800 | -2.00899200 | 1.70753300  |
| C  | -5.06736000 | -1.23379300 | 3.36165700  |
| H  | -6.23391400 | 0.54851800  | 3.03670800  |
| H  | -3.69503500 | -2.89495600 | 3.47030000  |
| H  | -5.71477300 | -1.61274900 | 4.15082700  |
| C  | -3.23718300 | 1.71703100  | -0.74418400 |
| C  | -2.78074900 | 3.02378600  | -0.54374200 |
| C  | -4.38856300 | 1.50738400  | -1.51647200 |
| C  | -3.45709200 | 4.10046500  | -1.11231700 |
| H  | -1.88029700 | 3.19622300  | 0.04565900  |
| C  | -5.05803400 | 2.58352000  | -2.09026500 |
| H  | -4.76979800 | 0.49613400  | -1.66437100 |
| C  | -4.59099300 | 3.88170500  | -1.88997500 |
| H  | -3.08647900 | 5.11155000  | -0.95471900 |
| H  | -5.94745800 | 2.40828500  | -2.69361000 |
| H  | -5.11266000 | 4.72295600  | -2.34340900 |
| H  | -3.37937900 | -1.59462900 | -1.17427800 |
| H  | -2.58223100 | -0.49442000 | -2.29808400 |
| Ru | 0.00101200  | 0.43643100  | 0.30540000  |
| H  | -0.21736700 | -1.02259200 | 1.16957600  |
| C  | 1.19141600  | -1.96616400 | -1.32647600 |
| H  | 1.08203400  | -2.58489800 | -0.42593900 |
| H  | 1.24260100  | -2.64087400 | -2.19596100 |
| C  | -1.25266100 | -1.90124500 | -1.34388800 |
| H  | -1.30341400 | -2.60663700 | -2.18945900 |
| H  | -1.19930200 | -2.48841500 | -0.41902300 |
| C  | 0.42809200  | 2.34164100  | -0.73143000 |
| O  | 0.91892900  | 3.28083200  | -0.13261000 |
| H  | 0.01700100  | -0.62961800 | -2.30754300 |
| O  | 0.17945300  | 2.66781800  | -2.09178000 |
| C  | -0.44540900 | 1.73658900  | -2.92227900 |
| H  | -1.17925300 | 1.12642800  | -2.37757500 |
| H  | -0.98226100 | 2.28666700  | -3.70513500 |
| H  | 0.28259100  | 1.07154600  | -3.42298900 |

**B11**

| -----                   |             |             |             |
|-------------------------|-------------|-------------|-------------|
| Coordinates (Angstroms) |             |             |             |
|                         | X           | Y           | Z           |
| -----                   |             |             |             |
| N                       | 0.18597100  | -1.14113900 | -1.24457000 |
| C                       | 2.56650300  | -1.26718200 | -0.72883500 |
| H                       | 2.84903500  | -0.71540700 | -1.63576600 |
| H                       | 3.40672100  | -1.92845000 | -0.48395700 |
| C                       | -2.19174000 | -0.81337500 | -1.67933200 |

|   |             |             |             |
|---|-------------|-------------|-------------|
| C | -0.19211100 | 1.60243300  | 1.78353100  |
| O | -0.30981800 | 2.35871700  | 2.66969000  |
| P | -2.27820800 | 0.20698800  | -0.13538800 |
| P | 2.27373600  | -0.01586200 | 0.61543300  |
| C | 2.90968000  | -0.80942100 | 2.13540800  |
| C | 4.17507500  | -1.41217600 | 2.16630000  |
| C | 2.13955600  | -0.78746700 | 3.30179100  |
| C | 4.65366600  | -1.98787200 | 3.33872300  |
| H | 4.79938700  | -1.41576300 | 1.27172600  |
| C | 2.62467300  | -1.35332600 | 4.47839700  |
| H | 1.15024000  | -0.33256500 | 3.27333300  |
| C | 3.87796300  | -1.95810100 | 4.49730800  |
| H | 5.63579600  | -2.45791700 | 3.34991500  |
| H | 2.01700100  | -1.32572200 | 5.38106800  |
| H | 4.25522500  | -2.40480700 | 5.41586800  |
| C | 3.53272300  | 1.26427100  | 0.25232600  |
| C | 3.54713900  | 1.83823400  | -1.02697000 |
| C | 4.41570800  | 1.75702400  | 1.21974700  |
| C | 4.43859500  | 2.85727900  | -1.33804900 |
| H | 2.83597200  | 1.49768500  | -1.78022700 |
| C | 5.30320400  | 2.78476800  | 0.90789400  |
| H | 4.41251200  | 1.33972900  | 2.22562200  |
| C | 5.32157300  | 3.33367800  | -0.37042200 |
| H | 4.43675400  | 3.28977100  | -2.33765100 |
| H | 5.98240100  | 3.15799200  | 1.67262600  |
| H | 6.01451800  | 4.13803700  | -0.61131400 |
| C | -3.41742100 | -0.73893400 | 0.94276400  |
| C | -3.05381700 | -1.04500200 | 2.25667500  |
| C | -4.66977200 | -1.15465000 | 0.46849600  |
| C | -3.92060200 | -1.76214200 | 3.07909700  |
| H | -2.07785800 | -0.72586000 | 2.62112300  |
| C | -5.53021200 | -1.87824300 | 1.28689100  |
| H | -4.98119900 | -0.89748900 | -0.54493900 |
| C | -5.15476900 | -2.18468400 | 2.59473800  |
| H | -3.62654300 | -1.99387400 | 4.10140500  |
| H | -6.49718700 | -2.20233500 | 0.90540900  |
| H | -5.82850000 | -2.75117400 | 3.23568000  |
| C | -3.28472000 | 1.65698500  | -0.61145800 |
| C | -2.97209700 | 2.37340200  | -1.77434900 |
| C | -4.30587700 | 2.13277100  | 0.21958900  |
| C | -3.68262000 | 3.52057100  | -2.10987500 |
| H | -2.15526000 | 2.04006300  | -2.41440300 |
| C | -5.01083300 | 3.28552500  | -0.11459200 |
| H | -4.55412400 | 1.59904900  | 1.13594400  |

|    |             |             |             |
|----|-------------|-------------|-------------|
| C  | -4.70514700 | 3.97945700  | -1.28171900 |
| H  | -3.42868400 | 4.06507100  | -3.01828000 |
| H  | -5.80162000 | 3.64203500  | 0.54351600  |
| H  | -5.25731600 | 4.88069400  | -1.54258700 |
| H  | -3.15034300 | -1.29565500 | -1.90765400 |
| H  | -1.95406300 | -0.13477000 | -2.50957300 |
| Ru | -0.01613800 | 0.39646000  | 0.40018100  |
| H  | -0.19583900 | -0.96705000 | 1.42404500  |
| C  | 1.30235100  | -2.06221800 | -0.98241200 |
| H  | 1.03082200  | -2.65670700 | -0.10046000 |
| H  | 1.44365800  | -2.75545900 | -1.82815300 |
| C  | -1.08130200 | -1.83442800 | -1.52636800 |
| H  | -0.99102400 | -2.45301600 | -2.43390200 |
| H  | -1.28279000 | -2.50805000 | -0.68247900 |
| C  | 0.23176200  | 1.95663500  | -1.04731000 |
| O  | 0.28282200  | 3.16407100  | -0.94282000 |
| H  | 0.41666600  | -0.54480500 | -2.04588100 |
| O  | 0.35334900  | 1.42567400  | -2.38939300 |
| C  | 0.54167700  | 2.40712300  | -3.40115800 |
| H  | 0.66509100  | 1.86655800  | -4.34472600 |
| H  | -0.32054400 | 3.08377300  | -3.47446000 |
| H  | 1.42825600  | 3.02389200  | -3.20552100 |

**B12**

**Coordinates (Angstroms)**

|   | <b>X</b>    | <b>Y</b>    | <b>Z</b>    |
|---|-------------|-------------|-------------|
| N | 0.05349500  | -1.93362500 | -1.81442500 |
| C | 2.47693000  | -1.99614100 | -1.39870200 |
| H | 2.70603500  | -1.58276800 | -2.39174900 |
| H | 3.31696000  | -2.64759600 | -1.12308100 |
| C | -2.39039700 | -1.68575200 | -1.92723400 |
| P | -2.25661000 | -0.29811100 | -0.69367900 |
| P | 2.26558100  | -0.56155500 | -0.22963900 |
| C | 2.91667000  | -1.20048200 | 1.36597600  |
| C | 4.12998100  | -1.89515300 | 1.45283800  |
| C | 2.18624200  | -0.95752300 | 2.53505200  |
| C | 4.59850200  | -2.35187000 | 2.68035400  |
| H | 4.72189300  | -2.07784800 | 0.55477100  |
| C | 2.66182800  | -1.40942600 | 3.76506000  |
| H | 1.24830500  | -0.40387100 | 2.47307200  |
| C | 3.86336300  | -2.10835600 | 3.84004200  |
| H | 5.54144300  | -2.89411700 | 2.73389700  |
| H | 2.08764300  | -1.21168600 | 4.66882300  |
| H | 4.23097700  | -2.46310700 | 4.80172900  |

|    |             |             |             |
|----|-------------|-------------|-------------|
| C  | 3.60685900  | 0.57290000  | -0.76909000 |
| C  | 4.79620300  | 0.12814800  | -1.36197900 |
| C  | 3.42132900  | 1.94784000  | -0.57615400 |
| C  | 5.78021300  | 1.03573100  | -1.74397300 |
| H  | 4.95953200  | -0.93670900 | -1.53109700 |
| C  | 4.40878000  | 2.85424000  | -0.95452500 |
| H  | 2.48468200  | 2.30273800  | -0.14379500 |
| C  | 5.58960900  | 2.40071800  | -1.53737100 |
| H  | 6.69911900  | 0.67586900  | -2.20464600 |
| H  | 4.25064100  | 3.92039200  | -0.79888300 |
| H  | 6.35956400  | 3.10967500  | -1.83741400 |
| C  | -3.27971900 | -0.87505800 | 0.71993900  |
| C  | -2.78591100 | -0.70711700 | 2.01901400  |
| C  | -4.54437700 | -1.44966800 | 0.54012000  |
| C  | -3.54542800 | -1.11520900 | 3.11442400  |
| H  | -1.80957700 | -0.24152400 | 2.16334400  |
| C  | -5.29568000 | -1.86530600 | 1.63454500  |
| H  | -4.95428500 | -1.56727300 | -0.46410100 |
| C  | -4.79499700 | -1.69911800 | 2.92530900  |
| H  | -3.15475000 | -0.97579100 | 4.12117700  |
| H  | -6.27490000 | -2.31666500 | 1.48138100  |
| H  | -5.38374800 | -2.02186100 | 3.78273300  |
| C  | -3.32562700 | 0.99405300  | -1.44150600 |
| C  | -3.02465000 | 2.33308900  | -1.16276700 |
| C  | -4.41870900 | 0.70418500  | -2.26868900 |
| C  | -3.80966400 | 3.35763900  | -1.68565700 |
| H  | -2.15620100 | 2.56433100  | -0.54392900 |
| C  | -5.19935400 | 1.72936900  | -2.79552200 |
| H  | -4.66550800 | -0.33120900 | -2.50674300 |
| C  | -4.89814300 | 3.05796300  | -2.50144400 |
| H  | -3.56478400 | 4.39435100  | -1.45998900 |
| H  | -6.04597500 | 1.49029800  | -3.43752600 |
| H  | -5.50949700 | 3.85902300  | -2.91372600 |
| H  | -3.34535000 | -2.22403000 | -1.86166900 |
| H  | -2.34207100 | -1.24223000 | -2.93241300 |
| Ru | 0.01530800  | -0.06346000 | -0.38100200 |
| H  | -0.17031300 | -1.15087500 | 0.76286000  |
| C  | 1.19030700  | -2.79766900 | -1.45000500 |
| H  | 0.96530100  | -3.21410500 | -0.45887900 |
| H  | 1.28692200  | -3.64582200 | -2.14963700 |
| C  | -1.23368800 | -2.64542100 | -1.72223100 |
| H  | -1.28163000 | -3.47705400 | -2.44605600 |
| H  | -1.28142100 | -3.08359600 | -0.71607900 |
| C  | -0.03258100 | 1.43699800  | 0.94371300  |

|   |             |             |             |
|---|-------------|-------------|-------------|
| O | -0.19752200 | 1.50450700  | 2.15659400  |
| H | 0.18078400  | -1.63587600 | -2.78302200 |
| O | 0.17714600  | 2.65495600  | 0.24465300  |
| C | 0.16367600  | 3.82902500  | 1.04851100  |
| H | -0.81007100 | 3.97298000  | 1.53477700  |
| H | 0.93184000  | 3.79007200  | 1.83128500  |
| H | 0.36515800  | 4.66776500  | 0.37497500  |

**TSB10**

**Coordinates (Angstroms)**

|   | <b>X</b>    | <b>Y</b>    | <b>Z</b>    |
|---|-------------|-------------|-------------|
| N | 0.10478000  | -1.33231500 | -1.40916300 |
| C | 2.52136900  | -1.47335200 | -1.00711000 |
| H | 2.75222700  | -1.04397700 | -1.99256100 |
| H | 3.34821100  | -2.14717900 | -0.74681200 |
| C | -2.31851800 | -1.00414800 | -1.57138200 |
| P | -2.18112400 | 0.27785400  | -0.23795700 |
| P | 2.34577600  | -0.06074500 | 0.18625300  |
| C | 2.97310700  | -0.73026500 | 1.77726300  |
| C | 4.19001200  | -1.41896400 | 1.85577300  |
| C | 2.24306800  | -0.50566500 | 2.94881500  |
| C | 4.65719400  | -1.89284400 | 3.07721400  |
| H | 4.78546400  | -1.57727700 | 0.95514100  |
| C | 2.71627200  | -0.97138300 | 4.17390700  |
| H | 1.30017500  | 0.03844400  | 2.88396000  |
| C | 3.91969700  | -1.66845700 | 4.23927300  |
| H | 5.60245100  | -2.43133300 | 3.12499800  |
| H | 2.14174100  | -0.78751500 | 5.08031500  |
| H | 4.28749200  | -2.03499700 | 5.19629800  |
| C | 3.70736700  | 1.06679100  | -0.29069200 |
| C | 4.81114300  | 0.66325800  | -1.05271100 |
| C | 3.63968200  | 2.39361000  | 0.15432800  |
| C | 5.82511600  | 1.56635400  | -1.36272400 |
| H | 4.88783200  | -0.36452000 | -1.40801100 |
| C | 4.65708700  | 3.29231800  | -0.15091200 |
| H | 2.77241600  | 2.72286900  | 0.72458400  |
| C | 5.75006200  | 2.88190900  | -0.91136000 |
| H | 6.67704200  | 1.24005000  | -1.95757900 |
| H | 4.58974300  | 4.32115900  | 0.19849900  |
| H | 6.54228300  | 3.58790500  | -1.15516200 |
| C | -3.19180300 | -0.41856500 | 1.13102300  |
| C | -2.66816300 | -0.49074300 | 2.42494300  |
| C | -4.50753200 | -0.84487300 | 0.90530600  |
| C | -3.44121900 | -0.99108300 | 3.47124800  |

|    |             |             |             |
|----|-------------|-------------|-------------|
| H  | -1.64766000 | -0.14880900 | 2.59841500  |
| C  | -5.27476700 | -1.35502200 | 1.94689400  |
| H  | -4.94047200 | -0.76376900 | -0.09310400 |
| C  | -4.74091000 | -1.42917200 | 3.23323800  |
| H  | -3.02406900 | -1.03805000 | 4.47579800  |
| H  | -6.29416300 | -1.68792900 | 1.75784000  |
| H  | -5.34290900 | -1.82324700 | 4.05044600  |
| C  | -3.28099000 | 1.63450200  | -0.79349500 |
| C  | -3.43533700 | 2.72225200  | 0.07954600  |
| C  | -3.92140100 | 1.67443000  | -2.03658600 |
| C  | -4.20659900 | 3.81955100  | -0.28304300 |
| H  | -2.92943300 | 2.71200000  | 1.04627700  |
| C  | -4.69003800 | 2.77908800  | -2.40178800 |
| H  | -3.82929300 | 0.84168500  | -2.73238700 |
| C  | -4.83299000 | 3.85312500  | -1.52860700 |
| H  | -4.31140900 | 4.65641500  | 0.40528600  |
| H  | -5.18092200 | 2.79589700  | -3.37370800 |
| H  | -5.43107200 | 4.71595400  | -1.81650500 |
| H  | -3.29765100 | -1.50124800 | -1.58208200 |
| H  | -2.19796900 | -0.49981400 | -2.54039400 |
| Ru | 0.10200800  | 0.48829700  | 0.03990500  |
| H  | -0.09441000 | -0.69413000 | 1.12659100  |
| C  | 1.21520100  | -2.24111100 | -1.07369500 |
| H  | 0.97913200  | -2.68031100 | -0.09530800 |
| H  | 1.28589800  | -3.06674800 | -1.80202800 |
| C  | -1.20128700 | -2.01409900 | -1.38850900 |
| H  | -1.25200400 | -2.79837200 | -2.16224100 |
| H  | -1.28741300 | -2.50789500 | -0.41094800 |
| C  | 0.12563300  | 2.17182000  | 0.95244300  |
| O  | -0.02319000 | 3.01051800  | 1.78495500  |
| H  | 0.26119100  | -0.97386700 | -2.35258900 |
| O  | 0.55805000  | 2.72863600  | -0.59446500 |
| C  | -0.30040800 | 3.73392200  | -1.05135400 |
| H  | -1.12357100 | 3.34875900  | -1.67879200 |
| H  | -0.74610200 | 4.29731600  | -0.21315700 |
| H  | 0.27604000  | 4.44989300  | -1.65940600 |

-----  
**TSB11**  
-----

**Coordinates (Angstroms)**  
-----

|   | <b>X</b>   | <b>Y</b>    | <b>Z</b>    |
|---|------------|-------------|-------------|
| N | 0.15641700 | -1.14843700 | -1.14109700 |
| C | 2.56440300 | -1.11306300 | -0.83093500 |
| H | 2.67785100 | -0.45172200 | -1.70039700 |
| H | 3.48575400 | -1.69930000 | -0.72920400 |

|   |             |             |             |
|---|-------------|-------------|-------------|
| C | -2.23862500 | -0.98847300 | -1.53256100 |
| C | -0.22157500 | 1.42225100  | 2.00405500  |
| O | -0.33081700 | 2.06436200  | 2.97339200  |
| P | -2.32365600 | 0.13476900  | -0.06204600 |
| P | 2.28314000  | -0.03138700 | 0.64374100  |
| C | 3.01991000  | -0.93460300 | 2.04645300  |
| C | 4.34567200  | -1.38745600 | 1.97593000  |
| C | 2.27859700  | -1.17278700 | 3.20698300  |
| C | 4.91304300  | -2.07240100 | 3.04431900  |
| H | 4.94104000  | -1.18903600 | 1.08385100  |
| C | 2.85093500  | -1.85551000 | 4.27858000  |
| H | 1.24668500  | -0.82732500 | 3.25929400  |
| C | 4.16476900  | -2.30752200 | 4.19768600  |
| H | 5.94201100  | -2.42155200 | 2.97874300  |
| H | 2.26560000  | -2.03554100 | 5.17843100  |
| H | 4.61019900  | -2.84305100 | 5.03430300  |
| C | 3.42157100  | 1.36531900  | 0.35219400  |
| C | 3.37765500  | 2.00961300  | -0.89296700 |
| C | 4.27284200  | 1.85775800  | 1.34762800  |
| C | 4.19147500  | 3.10935700  | -1.14056200 |
| H | 2.68310900  | 1.66314900  | -1.66197600 |
| C | 5.08141700  | 2.96344200  | 1.09517600  |
| H | 4.30828000  | 1.37595700  | 2.32381700  |
| C | 5.04680400  | 3.58712600  | -0.14891700 |
| H | 4.14916400  | 3.59969200  | -2.11159900 |
| H | 5.74044100  | 3.33745800  | 1.87685900  |
| H | 5.67911500  | 4.45146400  | -0.34441700 |
| C | -3.50945000 | -0.64592100 | 1.08258100  |
| C | -3.17332500 | -0.83056100 | 2.42675400  |
| C | -4.77368400 | -1.05293900 | 0.63167900  |
| C | -4.08186700 | -1.41699200 | 3.30517600  |
| H | -2.18943000 | -0.52047400 | 2.77671900  |
| C | -5.67650000 | -1.64401800 | 1.50857600  |
| H | -5.05767300 | -0.89534400 | -0.40948200 |
| C | -5.33052900 | -1.82717800 | 2.84714100  |
| H | -3.80973000 | -1.55559800 | 4.34991500  |
| H | -6.65363000 | -1.96052700 | 1.14796700  |
| H | -6.03830000 | -2.28937500 | 3.53303400  |
| C | -3.20649700 | 1.59052300  | -0.72344800 |
| C | -2.71197900 | 2.18022600  | -1.89660200 |
| C | -4.29992500 | 2.17304700  | -0.07315300 |
| C | -3.31954200 | 3.31656200  | -2.41810300 |
| H | -1.82981900 | 1.76169400  | -2.38823600 |
| C | -4.90018200 | 3.31568600  | -0.59811900 |



|    |             |             |             |
|----|-------------|-------------|-------------|
| H  | -4.68774200 | 1.73457200  | 0.84550500  |
| C  | -4.41574500 | 3.88568900  | -1.77201100 |
| H  | -2.92717900 | 3.76350400  | -3.32991700 |
| H  | -5.75076700 | 3.76066700  | -0.08451900 |
| H  | -4.88637900 | 4.77834200  | -2.18049800 |
| H  | -3.17957500 | -1.53336300 | -1.67516600 |
| H  | -2.08505700 | -0.35336300 | -2.41477100 |
| Ru | -0.04385500 | 0.32443400  | 0.51441000  |
| H  | -0.25605800 | -1.01041100 | 1.51573000  |
| C  | 1.35367900  | -1.99430600 | -1.04234900 |
| H  | 1.21050600  | -2.68895200 | -0.20282100 |
| H  | 1.47096600  | -2.59445600 | -1.95892700 |
| C  | -1.06279600 | -1.92874900 | -1.39002100 |
| H  | -0.94591100 | -2.53657200 | -2.30176700 |
| H  | -1.20051200 | -2.61700900 | -0.54454400 |
| C  | 0.22101300  | 1.89705300  | -0.78875700 |
| O  | 0.30210200  | 3.04293900  | -0.98636700 |
| H  | 0.29201500  | -0.44653300 | -1.89127300 |
| O  | 0.50542900  | 1.00275800  | -2.78758800 |
| C  | 0.67437700  | 2.15243900  | -3.49863500 |
| H  | 0.89234100  | 1.94258600  | -4.56908300 |
| H  | -0.21371300 | 2.82894300  | -3.50319100 |
| H  | 1.51294000  | 2.79770900  | -3.14502900 |

**B13**

| -----                   |             |             |             |
|-------------------------|-------------|-------------|-------------|
| Coordinates (Angstroms) |             |             |             |
|                         | X           | Y           | Z           |
| -----                   |             |             |             |
| N                       | 0.21894000  | -0.80798300 | -1.22087600 |
| C                       | 2.62327900  | -0.83306500 | -0.86010200 |
| H                       | 2.76858500  | -0.12495300 | -1.68739800 |
| H                       | 3.53274700  | -1.44082900 | -0.77275800 |
| C                       | -2.18378100 | -0.75411600 | -1.57063900 |
| C                       | -0.23329200 | 1.43923100  | 2.15589900  |
| O                       | -0.38299400 | 1.88965800  | 3.22067700  |
| P                       | -2.28013900 | 0.28960600  | -0.05931700 |
| P                       | 2.31469100  | 0.14926700  | 0.66591200  |
| C                       | 2.96904000  | -0.86487000 | 2.03457600  |
| C                       | 4.28199800  | -1.35433400 | 1.97207800  |
| C                       | 2.18917900  | -1.15372700 | 3.15778000  |
| C                       | 4.79766600  | -2.12432200 | 3.00801500  |
| H                       | 4.90913600  | -1.11856700 | 1.11165100  |
| C                       | 2.70983400  | -1.92029300 | 4.19825600  |
| H                       | 1.16623100  | -0.78324500 | 3.20884900  |
| C                       | 4.01070800  | -2.40867100 | 4.12344700  |

|    |             |             |             |
|----|-------------|-------------|-------------|
| H  | 5.81674800  | -2.50217800 | 2.94654000  |
| H  | 2.09301400  | -2.13924700 | 5.06793300  |
| H  | 4.41451500  | -3.01126300 | 4.93537900  |
| C  | 3.47493800  | 1.55686700  | 0.56921300  |
| C  | 3.52418500  | 2.31847900  | -0.60700400 |
| C  | 4.25267500  | 1.95034700  | 1.66436700  |
| C  | 4.35461800  | 3.43027700  | -0.69230000 |
| H  | 2.90037900  | 2.05016000  | -1.46061300 |
| C  | 5.07747100  | 3.06876000  | 1.57779800  |
| H  | 4.21767400  | 1.37838800  | 2.59051400  |
| C  | 5.13479700  | 3.80727800  | 0.39946000  |
| H  | 4.38554600  | 4.00856300  | -1.61392600 |
| H  | 5.67760600  | 3.36169800  | 2.43747400  |
| H  | 5.78109500  | 4.68067200  | 0.33304000  |
| C  | -3.39852700 | -0.60131000 | 1.07479300  |
| C  | -3.01380000 | -0.90002800 | 2.38441100  |
| C  | -4.67519500 | -0.98228000 | 0.63605800  |
| C  | -3.88711600 | -1.56843400 | 3.24009700  |
| H  | -2.02100300 | -0.61387300 | 2.72907100  |
| C  | -5.54358800 | -1.65265900 | 1.48944100  |
| H  | -4.99529400 | -0.73976600 | -0.37794500 |
| C  | -5.14983600 | -1.94627900 | 2.79460800  |
| H  | -3.57652600 | -1.79449800 | 4.25858200  |
| H  | -6.53086200 | -1.94575900 | 1.13630700  |
| H  | -5.83082300 | -2.46957700 | 3.46372700  |
| C  | -3.23296600 | 1.76505000  | -0.55387900 |
| C  | -2.85781400 | 2.46359500  | -1.71184800 |
| C  | -4.26606700 | 2.27031500  | 0.24338000  |
| C  | -3.53031700 | 3.62670700  | -2.07275000 |
| H  | -2.02345500 | 2.10921900  | -2.32318400 |
| C  | -4.92943600 | 3.43889100  | -0.11960700 |
| H  | -4.55777200 | 1.74777600  | 1.15325000  |
| C  | -4.56795700 | 4.11577300  | -1.28070500 |
| H  | -3.23467500 | 4.15821700  | -2.97572600 |
| H  | -5.73237900 | 3.81982800  | 0.50941900  |
| H  | -5.08890700 | 5.02819000  | -1.56620800 |
| H  | -3.10636800 | -1.32847500 | -1.72071400 |
| H  | -2.05762200 | -0.07732600 | -2.42569900 |
| Ru | -0.00265300 | 0.55356400  | 0.50038900  |
| H  | -0.18008900 | -0.89040600 | 1.33305100  |
| C  | 1.38257300  | -1.66538300 | -1.11437300 |
| H  | 1.27147000  | -2.42036900 | -0.30403000 |
| H  | 1.51495700  | -2.24326500 | -2.04967200 |
| C  | -0.95623100 | -1.63282500 | -1.43227300 |

|   |             |             |             |
|---|-------------|-------------|-------------|
| H | -0.83244400 | -2.23434100 | -2.35406400 |
| H | -1.10858100 | -2.36352500 | -0.60757500 |
| C | 0.20026400  | 2.26181200  | -0.47630700 |
| O | 0.30301600  | 3.33531800  | -0.89791500 |
| H | 0.21452900  | 0.39756400  | -2.46050000 |
| O | 0.12666100  | 1.07319900  | -3.20435400 |
| C | 0.18585800  | 0.33835400  | -4.39235900 |
| H | 0.18910500  | 1.03849600  | -5.23742600 |
| H | 1.10058900  | -0.27863600 | -4.47264400 |
| H | -0.67816500 | -0.34020300 | -4.53288100 |

**B14**

| -----                   |             |             |             |
|-------------------------|-------------|-------------|-------------|
| Coordinates (Angstroms) |             |             |             |
|                         | X           | Y           | Z           |
| -----                   |             |             |             |
| N                       | -0.41994100 | -1.61847900 | -0.94303300 |
| C                       | 1.97210000  | -2.00867600 | -0.70544100 |
| H                       | 2.17387700  | -1.72344100 | -1.74863100 |
| H                       | 2.75575800  | -2.71125400 | -0.39294100 |
| C                       | -2.80630200 | -1.19338800 | -1.19249100 |
| C                       | -0.14170000 | 1.72713500  | 1.31939200  |
| O                       | -0.08804200 | 2.64911800  | 2.04689800  |
| P                       | -2.58403400 | 0.10626100  | 0.08694500  |
| P                       | 1.97432900  | -0.46015900 | 0.30234900  |
| C                       | 2.74384100  | -0.91683400 | 1.90148300  |
| C                       | 3.99592900  | -1.54484400 | 1.93461800  |
| C                       | 2.10135000  | -0.61923400 | 3.10662300  |
| C                       | 4.58944400  | -1.87463900 | 3.14733800  |
| H                       | 4.51540900  | -1.77132900 | 1.00223300  |
| C                       | 2.69863800  | -0.94738700 | 4.32208100  |
| H                       | 1.12790300  | -0.13028900 | 3.08577500  |
| C                       | 3.93948000  | -1.57674400 | 4.34449700  |
| H                       | 5.56192400  | -2.36434000 | 3.15985700  |
| H                       | 2.18788300  | -0.71061000 | 5.25398100  |
| H                       | 4.40513800  | -1.83358900 | 5.29473700  |
| C                       | 3.27276000  | 0.57750300  | -0.47333300 |
| C                       | 4.31173100  | 0.04084800  | -1.24536600 |
| C                       | 3.19103400  | 1.96823200  | -0.32407900 |
| C                       | 5.25182900  | 0.87587500  | -1.84469700 |
| H                       | 4.38749800  | -1.03720300 | -1.38723700 |
| C                       | 4.13127200  | 2.80160700  | -0.92241400 |
| H                       | 2.37253500  | 2.39725900  | 0.25575000  |
| C                       | 5.16360700  | 2.25693800  | -1.68414600 |
| H                       | 6.05424200  | 0.44473800  | -2.44151900 |
| H                       | 4.05300700  | 3.88026600  | -0.79896600 |

|    |             |             |             |
|----|-------------|-------------|-------------|
| H  | 5.89677200  | 2.90911300  | -2.15574100 |
| C  | -3.49424900 | -0.46890400 | 1.56551300  |
| C  | -3.29601500 | 0.22999800  | 2.76431900  |
| C  | -4.38158200 | -1.54965900 | 1.55435900  |
| C  | -3.98449500 | -0.13047600 | 3.91661000  |
| H  | -2.59129800 | 1.06232100  | 2.78953200  |
| C  | -5.06261900 | -1.91795000 | 2.71365000  |
| H  | -4.54779100 | -2.11715200 | 0.63973600  |
| C  | -4.86851100 | -1.20846100 | 3.89431000  |
| H  | -3.82290500 | 0.42572700  | 4.83857100  |
| H  | -5.74577500 | -2.76564900 | 2.69092000  |
| H  | -5.40308900 | -1.49540100 | 4.79833400  |
| C  | -3.59699500 | 1.52224100  | -0.47192700 |
| C  | -2.97412600 | 2.74004000  | -0.76153000 |
| C  | -4.98774500 | 1.41423200  | -0.60639500 |
| C  | -3.73021500 | 3.83239200  | -1.18152100 |
| H  | -1.89273200 | 2.82327900  | -0.65959000 |
| C  | -5.73965700 | 2.50459100  | -1.02939500 |
| H  | -5.48572100 | 0.47392600  | -0.36428900 |
| C  | -5.11074600 | 3.71601300  | -1.31603000 |
| H  | -3.23653000 | 4.77766500  | -1.40106900 |
| H  | -6.81993900 | 2.41240000  | -1.12955400 |
| H  | -5.70135700 | 4.57147300  | -1.63978400 |
| H  | -3.81994000 | -1.61302400 | -1.22653000 |
| H  | -2.63367900 | -0.69208500 | -2.15521800 |
| Ru | -0.26292600 | 0.20205900  | 0.25364200  |
| H  | -0.44213300 | -0.68869200 | 1.56742700  |
| C  | 0.58329200  | -2.62023000 | -0.61525900 |
| H  | 0.42890100  | -3.05159300 | 0.39591900  |
| H  | 0.52172700  | -3.47115000 | -1.32260900 |
| C  | -1.73412100 | -2.24316700 | -0.95316700 |
| H  | -1.78737200 | -3.01559200 | -1.74697900 |
| H  | -1.94861000 | -2.77620500 | -0.00131800 |
| C  | 0.76392900  | 1.11553600  | -2.64879300 |
| O  | -0.13191600 | 1.38347300  | -1.86785400 |
| H  | 1.60805000  | 0.44942000  | -2.41224300 |
| O  | 0.81377700  | 1.66902400  | -3.85343600 |
| C  | 1.89926900  | 1.20478600  | -4.67135600 |
| H  | 1.95921500  | 0.11209900  | -4.62662400 |
| H  | 1.66914800  | 1.52540200  | -5.68845300 |
| H  | 2.84099600  | 1.66001600  | -4.34418500 |
| C  | -0.93566800 | -0.95409000 | -4.35018800 |
| H  | -0.63153900 | -0.80062800 | -5.39427100 |
| H  | -1.70442800 | -1.74731100 | -4.34572000 |

|   |             |             |             |
|---|-------------|-------------|-------------|
| H | -1.41522700 | -0.01816900 | -4.00909100 |
| O | 0.19894100  | -1.29564800 | -3.60436400 |
| H | -0.07458000 | -1.35980700 | -2.63052000 |

**TSB12**

| -----                   |             |             |             |
|-------------------------|-------------|-------------|-------------|
| Coordinates (Angstroms) |             |             |             |
|                         | X           | Y           | Z           |
| -----                   |             |             |             |
| N                       | -0.45242100 | -1.64115600 | -0.91271500 |
| C                       | 1.90467900  | -2.10921100 | -0.57072700 |
| H                       | 2.10319000  | -1.90238200 | -1.63052300 |
| H                       | 2.66070100  | -2.81582900 | -0.20681500 |
| C                       | -2.80149800 | -1.06279000 | -1.22405800 |
| C                       | -0.12759400 | 1.60636800  | 1.54255700  |
| O                       | -0.03683400 | 2.46873000  | 2.33322100  |
| P                       | -2.59826300 | 0.17481300  | 0.12274300  |
| P                       | 1.95741900  | -0.50736400 | 0.34529200  |
| C                       | 2.81581500  | -0.87639500 | 1.91793200  |
| C                       | 4.11288700  | -1.40686300 | 1.90872600  |
| C                       | 2.18746700  | -0.63186700 | 3.14206500  |
| C                       | 4.76446400  | -1.69439300 | 3.10224300  |
| H                       | 4.61830900  | -1.58773900 | 0.95869500  |
| C                       | 2.84437900  | -0.91619900 | 4.33784700  |
| H                       | 1.17750400  | -0.22335700 | 3.15231200  |
| C                       | 4.12955100  | -1.44862700 | 4.31961800  |
| H                       | 5.77184700  | -2.10711800 | 3.08404600  |
| H                       | 2.34654000  | -0.72110800 | 5.28616000  |
| H                       | 4.64171500  | -1.67131900 | 5.25433500  |
| C                       | 3.16746900  | 0.52626100  | -0.55807600 |
| C                       | 4.05841200  | 0.02040200  | -1.51334000 |
| C                       | 3.16762500  | 1.90333100  | -0.29424200 |
| C                       | 4.93528900  | 0.87312400  | -2.18116100 |
| H                       | 4.07380300  | -1.04477900 | -1.74219100 |
| C                       | 4.04344100  | 2.75206000  | -0.96087900 |
| H                       | 2.46131700  | 2.31183500  | 0.42963900  |
| C                       | 4.93003000  | 2.23833800  | -1.90639900 |
| H                       | 5.62340900  | 0.46623200  | -2.92061500 |
| H                       | 4.02785300  | 3.81941500  | -0.74819800 |
| H                       | 5.61240000  | 2.90362300  | -2.43300300 |
| C                       | -3.57016300 | -0.45726600 | 1.53711500  |
| C                       | -3.35974500 | 0.13838600  | 2.78829800  |
| C                       | -4.51783800 | -1.48032100 | 1.42816100  |
| C                       | -4.09456000 | -0.26451100 | 3.89726800  |
| H                       | -2.60692100 | 0.92094900  | 2.89108600  |
| C                       | -5.24507100 | -1.89238200 | 2.54360200  |

|    |             |             |             |
|----|-------------|-------------|-------------|
| H  | -4.69428500 | -1.96883800 | 0.47078100  |
| C  | -5.03949200 | -1.28253400 | 3.77724800  |
| H  | -3.92328900 | 0.21204200  | 4.86094000  |
| H  | -5.97575100 | -2.69346900 | 2.44390700  |
| H  | -5.61039500 | -1.60273400 | 4.64706000  |
| C  | -3.55806800 | 1.63571100  | -0.40716200 |
| C  | -2.91215900 | 2.86447100  | -0.57576800 |
| C  | -4.93731400 | 1.54658600  | -0.63851200 |
| C  | -3.63575100 | 3.98642000  | -0.97502600 |
| H  | -1.83925900 | 2.93561300  | -0.40066300 |
| C  | -5.65529300 | 2.66658300  | -1.04131600 |
| H  | -5.45278300 | 0.59659700  | -0.48867600 |
| C  | -5.00419300 | 3.88855300  | -1.20895600 |
| H  | -3.12606700 | 4.93990800  | -1.10242400 |
| H  | -6.72668800 | 2.58902800  | -1.21938600 |
| H  | -5.56863600 | 4.76660900  | -1.51840400 |
| H  | -3.83174200 | -1.42317400 | -1.34128900 |
| H  | -2.53500000 | -0.54230600 | -2.15580300 |
| Ru | -0.27621400 | 0.18744000  | 0.35840200  |
| H  | -0.48902000 | -0.79894400 | 1.60299600  |
| C  | 0.49664500  | -2.67084900 | -0.46311500 |
| H  | 0.26635400  | -2.98060000 | 0.56894900  |
| H  | 0.41162300  | -3.56334100 | -1.10684900 |
| C  | -1.81401900 | -2.18551300 | -0.95825200 |
| H  | -1.88448700 | -2.95467900 | -1.74758800 |
| H  | -2.05559100 | -2.68371600 | -0.00262100 |
| C  | 0.71292200  | 1.23565600  | -2.45651200 |
| O  | 0.03899400  | 1.64634100  | -1.52099000 |
| H  | 0.94505100  | 0.16033100  | -2.63625600 |
| O  | 1.18736800  | 2.08389600  | -3.36241400 |
| C  | 1.91986000  | 1.48291700  | -4.44118000 |
| H  | 2.03345000  | 0.40299600  | -4.28572100 |
| H  | 1.37226000  | 1.66708000  | -5.37036000 |
| H  | 2.90077900  | 1.96313200  | -4.48644900 |
| C  | -0.45008100 | -1.11938100 | -4.20943900 |
| H  | -0.05070000 | -1.21905400 | -5.24041900 |
| H  | -1.42730700 | -1.65474800 | -4.21578000 |
| H  | -0.72095500 | -0.03212900 | -4.10789500 |
| O  | 0.43548700  | -1.57212700 | -3.26941900 |
| H  | -0.09888100 | -1.50992400 | -2.07862500 |

-----  
**B15**

-----  
**Coordinates (Angstroms)**

**X**

**Y**

**Z**  
-----

|   |             |             |             |
|---|-------------|-------------|-------------|
| N | -0.28875500 | -1.91368800 | -0.91994100 |
| C | 2.06595600  | -2.37914300 | -0.57489400 |
| H | 2.25093400  | -2.19377200 | -1.64075900 |
| H | 2.82167800  | -3.08104100 | -0.20238000 |
| C | -2.61481200 | -1.27568900 | -1.27946900 |
| C | 0.05640200  | 1.33897200  | 1.54077900  |
| O | 0.15711100  | 2.19472400  | 2.33586600  |
| P | -2.42417400 | -0.04067800 | 0.07478800  |
| P | 2.13318300  | -0.76315100 | 0.31768100  |
| C | 3.02363200  | -1.10283600 | 1.87717900  |
| C | 4.35438000  | -1.54221200 | 1.84442300  |
| C | 2.38868800  | -0.93628600 | 3.11097500  |
| C | 5.03219800  | -1.82023700 | 3.02537800  |
| H | 4.86258000  | -1.65995600 | 0.88613000  |
| C | 3.07204100  | -1.21184200 | 4.29407400  |
| H | 1.35481800  | -0.59342300 | 3.13790800  |
| C | 4.39035400  | -1.65500000 | 4.25264600  |
| H | 6.06505400  | -2.16247900 | 2.99008400  |
| H | 2.57031700  | -1.07781300 | 5.25085600  |
| H | 4.92283500  | -1.87027900 | 5.17764700  |
| C | 3.30157300  | 0.28208400  | -0.62065500 |
| C | 4.05203100  | -0.16668500 | -1.71374900 |
| C | 3.38130500  | 1.63342000  | -0.25216800 |
| C | 4.86795700  | 0.71814900  | -2.41718600 |
| H | 4.00310400  | -1.20759500 | -2.02948000 |
| C | 4.19749200  | 2.51211900  | -0.95308400 |
| H | 2.78001500  | 1.99911400  | 0.58155900  |
| C | 4.94128300  | 2.05610500  | -2.04087000 |
| H | 5.44296500  | 0.35668600  | -3.26851900 |
| H | 4.24343400  | 3.55864300  | -0.65789000 |
| H | 5.57347700  | 2.74569700  | -2.59789200 |
| C | -3.43400100 | -0.66413600 | 1.46554700  |
| C | -3.21762300 | -0.09847700 | 2.72948400  |
| C | -4.41841300 | -1.64822400 | 1.32551400  |
| C | -3.98242800 | -0.49224700 | 3.82140900  |
| H | -2.43779500 | 0.65366700  | 2.85542200  |
| C | -5.17539600 | -2.05183100 | 2.42388800  |
| H | -4.60036000 | -2.11216500 | 0.35684700  |
| C | -4.96328100 | -1.47139700 | 3.67074300  |
| H | -3.80717500 | -0.03894800 | 4.79541500  |
| H | -5.93421900 | -2.82279500 | 2.30098000  |
| H | -5.55753300 | -1.78478700 | 4.52722200  |
| C | -3.34884200 | 1.43112400  | -0.48165200 |
| C | -2.69175900 | 2.66015100  | -0.59599700 |

|    |             |             |             |
|----|-------------|-------------|-------------|
| C  | -4.71453700 | 1.34959500  | -0.78492700 |
| C  | -3.39196900 | 3.79078300  | -1.01172900 |
| H  | -1.62846600 | 2.72483200  | -0.36860700 |
| C  | -5.40873300 | 2.47866800  | -1.20328300 |
| H  | -5.23877100 | 0.39847700  | -0.68076200 |
| C  | -4.74721800 | 3.70123500  | -1.31579600 |
| H  | -2.87387800 | 4.74420300  | -1.09824700 |
| H  | -6.46959400 | 2.40757200  | -1.43766000 |
| H  | -5.29315300 | 4.58626000  | -1.63839500 |
| H  | -3.64928300 | -1.61272400 | -1.42445200 |
| H  | -2.31263600 | -0.76343400 | -2.20504200 |
| Ru | -0.10163800 | -0.06121600 | 0.34481200  |
| H  | -0.32538900 | -1.05517700 | 1.58614500  |
| C  | 0.66096700  | -2.94418400 | -0.45655500 |
| H  | 0.41342200  | -3.22150300 | 0.57742200  |
| H  | 0.57125300  | -3.84337200 | -1.08667900 |
| C  | -1.66664400 | -2.42693700 | -0.99476700 |
| H  | -1.73835500 | -3.19730000 | -1.77903200 |
| H  | -1.91768300 | -2.90654000 | -0.03612000 |
| C  | 0.81766000  | 0.98673200  | -2.49301500 |
| O  | 0.20798800  | 1.39487000  | -1.50736500 |
| H  | 1.02529300  | -0.09802700 | -2.71576400 |
| O  | 1.27742000  | 1.86236100  | -3.38239400 |
| C  | 1.95006900  | 1.27830400  | -4.51034000 |
| H  | 2.10696800  | 0.20345600  | -4.35468600 |
| H  | 1.33624600  | 1.44051300  | -5.40175500 |
| H  | 2.90751000  | 1.79413400  | -4.62238900 |
| C  | -0.04456500 | -1.43574900 | -4.32473800 |
| H  | 0.35697800  | -1.55964200 | -5.36128500 |
| H  | -0.99386400 | -2.03114700 | -4.31545500 |
| H  | -0.40203400 | -0.35936400 | -4.29956500 |
| O  | 0.83843800  | -1.75345200 | -3.34807800 |
| H  | 0.04074600  | -1.73468400 | -1.92688800 |

-----  
**TSB13**  
-----

**Coordinates (Angstroms)**

|   | <b>X</b>    | <b>Y</b>    | <b>Z</b>    |
|---|-------------|-------------|-------------|
| N | -0.31517300 | -1.89985300 | -0.98105100 |
| C | 2.08361000  | -2.25390100 | -0.73068700 |
| H | 2.24802200  | -2.00044800 | -1.78660300 |
| H | 2.87377800  | -2.94995500 | -0.42232700 |
| C | -2.68119400 | -1.35187200 | -1.21465800 |
| C | 0.02285100  | 1.40778600  | 1.41123300  |
| O | 0.11127000  | 2.28935600  | 2.17923500  |



|   |             |             |             |
|---|-------------|-------------|-------------|
| P | -2.45724700 | -0.04764000 | 0.07598400  |
| P | 2.12184900  | -0.68579400 | 0.24836500  |
| C | 2.93375700  | -1.13378300 | 1.82662300  |
| C | 4.21109200  | -1.71078200 | 1.82899500  |
| C | 2.29743200  | -0.88537800 | 3.04605200  |
| C | 4.83299200  | -2.04184500 | 3.02706300  |
| H | 4.72703300  | -1.89206300 | 0.88476100  |
| C | 2.92490500  | -1.21208200 | 4.24660000  |
| H | 1.30389700  | -0.43836000 | 3.04866000  |
| C | 4.18944100  | -1.79225000 | 4.23898100  |
| H | 5.82488400  | -2.49080100 | 3.01673000  |
| H | 2.42063400  | -1.01184200 | 5.19047400  |
| H | 4.67911000  | -2.04797400 | 5.17731800  |
| C | 3.36885400  | 0.36115700  | -0.57718800 |
| C | 4.30680600  | -0.13467100 | -1.49001600 |
| C | 3.36386100  | 1.73051800  | -0.28310300 |
| C | 5.22789100  | 0.72251900  | -2.08769900 |
| H | 4.32188700  | -1.19430100 | -1.74303900 |
| C | 4.28760800  | 2.58332500  | -0.87577700 |
| H | 2.61664900  | 2.13098400  | 0.40253800  |
| C | 5.22187400  | 2.08055500  | -1.77976100 |
| H | 5.95036500  | 0.32569100  | -2.79914000 |
| H | 4.26927600  | 3.64588900  | -0.64101100 |
| H | 5.94064700  | 2.74967000  | -2.24988600 |
| C | -3.37903600 | -0.64827600 | 1.53682600  |
| C | -2.99143600 | -0.17791300 | 2.79860200  |
| C | -4.45736900 | -1.53708100 | 1.45270400  |
| C | -3.67372400 | -0.57459700 | 3.94369500  |
| H | -2.13898600 | 0.49649500  | 2.87944000  |
| C | -5.13179900 | -1.94478400 | 2.60169000  |
| H | -4.78278300 | -1.92009500 | 0.48617300  |
| C | -4.74306500 | -1.46271500 | 3.84811400  |
| H | -3.36107000 | -0.19649000 | 4.91543400  |
| H | -5.96371900 | -2.64234500 | 2.51962700  |
| H | -5.27113200 | -1.78093400 | 4.74537300  |
| C | -3.44115100 | 1.36816000  | -0.52639000 |
| C | -2.76822300 | 2.41259600  | -1.17305500 |
| C | -4.83250100 | 1.43116500  | -0.37775400 |
| C | -3.48420700 | 3.49741900  | -1.67349100 |
| H | -1.68467000 | 2.36329200  | -1.28788700 |
| C | -5.54101500 | 2.51872800  | -0.87790900 |
| H | -5.36387900 | 0.63314200  | 0.14084900  |
| C | -4.86776500 | 3.55267700  | -1.52641900 |
| H | -2.95465800 | 4.30543700  | -2.17507600 |

|    |             |             |             |
|----|-------------|-------------|-------------|
| H  | -6.62213700 | 2.56221200  | -0.75577800 |
| H  | -5.42414900 | 4.40555200  | -1.91218800 |
| H  | -3.70861200 | -1.73234400 | -1.27398700 |
| H  | -2.46905300 | -0.86726100 | -2.17931200 |
| Ru | -0.12269900 | -0.01976200 | 0.25564800  |
| H  | -0.33196300 | -0.99856100 | 1.52675500  |
| C  | 0.71132300  | -2.88938500 | -0.59605500 |
| H  | 0.51211300  | -3.20329200 | 0.43732900  |
| H  | 0.64202100  | -3.77760800 | -1.24391900 |
| C  | -1.67840400 | -2.46066500 | -0.95623000 |
| H  | -1.77368300 | -3.26099300 | -1.70760200 |
| H  | -1.84386400 | -2.91212900 | 0.03247200  |
| C  | 0.85948100  | 0.87467500  | -2.59538400 |
| O  | 0.22702300  | 1.29788800  | -1.60386300 |
| H  | 0.93809000  | -0.56766600 | -3.16252300 |
| O  | 1.28893400  | 1.90871300  | -3.38909400 |
| C  | 2.04399000  | 1.50849600  | -4.52183800 |
| H  | 2.27766000  | 0.43623300  | -4.48657600 |
| H  | 1.48096800  | 1.72487400  | -5.43961700 |
| H  | 2.97852300  | 2.08048500  | -4.53682300 |
| C  | -0.15353200 | -1.37527700 | -4.63014000 |
| H  | 0.31726300  | -1.46012900 | -5.62759400 |
| H  | -0.97825300 | -2.10969100 | -4.60251300 |
| H  | -0.61727200 | -0.36749700 | -4.58114200 |
| O  | 0.75361000  | -1.58093800 | -3.59344000 |
| H  | -0.09721600 | -1.66793100 | -1.97052900 |

**B16**

| -----                   |             |             |             |
|-------------------------|-------------|-------------|-------------|
| Coordinates (Angstroms) |             |             |             |
|                         | X           | Y           | Z           |
| -----                   |             |             |             |
| N                       | -0.14952700 | -1.29512800 | -1.19397100 |
| C                       | 2.22587900  | -1.75650000 | -0.79773800 |
| H                       | 2.55558400  | -1.38612800 | -1.77607800 |
| H                       | 2.95648000  | -2.51053200 | -0.47759100 |
| C                       | -2.48687800 | -0.65248700 | -1.52292100 |
| C                       | 0.11790000  | 1.71318000  | 1.55169800  |
| O                       | 0.23056600  | 2.53318800  | 2.38094800  |
| P                       | -2.36179200 | 0.37033000  | 0.01315700  |
| P                       | 2.20005200  | -0.29819700 | 0.34507000  |
| C                       | 2.81031800  | -0.91069700 | 1.95155000  |
| C                       | 3.33513400  | 0.00149100  | 2.87582600  |
| C                       | 2.67151800  | -2.25112800 | 2.32632500  |
| C                       | 3.72090800  | -0.42209900 | 4.14317200  |
| H                       | 3.44457500  | 1.05128900  | 2.60051200  |

|    |             |             |             |
|----|-------------|-------------|-------------|
| C  | 3.05995800  | -2.67349600 | 3.59503500  |
| H  | 2.25082900  | -2.97453200 | 1.62789800  |
| C  | 3.58467100  | -1.76063200 | 4.50600300  |
| H  | 4.12942500  | 0.29735500  | 4.85053200  |
| H  | 2.95047900  | -3.72101400 | 3.87169800  |
| H  | 3.88678800  | -2.09087100 | 5.49842300  |
| C  | 3.56198100  | 0.76846500  | -0.23785000 |
| C  | 4.87802300  | 0.29005000  | -0.30244700 |
| C  | 3.28624800  | 2.07936600  | -0.63953700 |
| C  | 5.89878500  | 1.10944100  | -0.77118600 |
| H  | 5.10398400  | -0.72605900 | 0.02366800  |
| C  | 4.31186800  | 2.89647300  | -1.11097400 |
| H  | 2.26376500  | 2.45167700  | -0.59074500 |
| C  | 5.61519500  | 2.41276100  | -1.17880700 |
| H  | 6.91889600  | 0.73174700  | -0.81833200 |
| H  | 4.08704100  | 3.91412100  | -1.42528600 |
| H  | 6.41585500  | 3.05259200  | -1.54673900 |
| C  | -3.33113300 | -0.53536400 | 1.26990200  |
| C  | -2.95962200 | -0.40598200 | 2.61430300  |
| C  | -4.43983100 | -1.32867800 | 0.94818500  |
| C  | -3.68167800 | -1.05199100 | 3.61276000  |
| H  | -2.08779000 | 0.19513300  | 2.87204800  |
| C  | -5.15436200 | -1.98484800 | 1.94755800  |
| H  | -4.75881600 | -1.43359900 | -0.08854200 |
| C  | -4.77742000 | -1.84587500 | 3.28085800  |
| H  | -3.38114200 | -0.94163200 | 4.65316000  |
| H  | -6.01019500 | -2.60316100 | 1.68211400  |
| H  | -5.33585800 | -2.35909300 | 4.06177500  |
| C  | -3.34295800 | 1.87287700  | -0.33160700 |
| C  | -2.71470000 | 2.92130500  | -1.01990700 |
| C  | -4.67253600 | 2.02135400  | 0.08090100  |
| C  | -3.41950100 | 4.08629400  | -1.30697700 |
| H  | -1.67150100 | 2.81798400  | -1.32346100 |
| C  | -5.36818900 | 3.19314200  | -0.20380900 |
| H  | -5.16710700 | 1.22486600  | 0.63514500  |
| C  | -4.74441500 | 4.22583500  | -0.89939900 |
| H  | -2.92398000 | 4.89421100  | -1.84258300 |
| H  | -6.40100100 | 3.29963600  | 0.12459900  |
| H  | -5.28982600 | 5.14277800  | -1.11777200 |
| H  | -3.50616600 | -0.99942000 | -1.73250400 |
| H  | -2.19899100 | 0.00720300  | -2.35432200 |
| Ru | -0.02640500 | 0.38084800  | 0.28351800  |
| H  | -0.22601000 | -0.67243600 | 1.49406000  |
| C  | 0.83933900  | -2.36084500 | -0.94079200 |

|   |             |             |             |
|---|-------------|-------------|-------------|
| H | 0.52730600  | -2.88142500 | -0.02563500 |
| H | 0.83206800  | -3.08382300 | -1.77111200 |
| C | -1.51279800 | -1.81221400 | -1.41239200 |
| H | -1.54131200 | -2.44166600 | -2.31605600 |
| H | -1.76770000 | -2.45160700 | -0.55576300 |
| C | 0.70886500  | 1.31848000  | -2.66646100 |
| O | 0.17405000  | 1.69653100  | -1.59528000 |
| H | 0.14994400  | -0.81779500 | -2.05503000 |
| O | 0.82940600  | 2.40061900  | -3.51789900 |
| C | 1.42333300  | 2.11342900  | -4.77136100 |
| H | 0.65314100  | 2.00821000  | -5.54897000 |
| H | 2.07375100  | 2.95341600  | -5.03890200 |
| H | 2.02166000  | 1.19382500  | -4.73269000 |
| C | 0.42604500  | -1.33323700 | -4.81798600 |
| H | 0.09746900  | -2.38095400 | -4.87664300 |
| H | -0.45981000 | -0.71589500 | -4.57345900 |
| H | 0.75854900  | -1.03588200 | -5.82922800 |
| O | 1.43823100  | -1.21226700 | -3.85837500 |
| H | 1.32326100  | -0.29268400 | -3.44953900 |

**B17**

**Coordinates (Angstroms)**

|   | <b>X</b>    | <b>Y</b>    | <b>Z</b>    |
|---|-------------|-------------|-------------|
| N | 0.25879100  | -1.37283600 | -1.12746500 |
| C | 2.66463300  | -1.33387200 | -0.73058300 |
| H | 2.79779100  | -0.71588800 | -1.62906900 |
| H | 3.57364900  | -1.93231500 | -0.58971900 |
| C | -2.15667600 | -1.21677600 | -1.45398700 |
| C | -0.15653700 | 1.28405300  | 1.97911300  |
| O | -0.29757200 | 1.95574000  | 2.92864600  |
| P | -2.19326400 | 0.02493900  | -0.07537300 |
| P | 2.35745100  | -0.17954900 | 0.68214100  |
| C | 3.09080700  | -1.02363500 | 2.13563600  |
| C | 4.45586400  | -1.34109500 | 2.16322100  |
| C | 2.29664100  | -1.33756700 | 3.24194600  |
| C | 5.01145500  | -1.97163900 | 3.27026600  |
| H | 5.09293600  | -1.08041600 | 1.31658600  |
| C | 2.85672000  | -1.96378500 | 4.35399100  |
| H | 1.23502800  | -1.09205600 | 3.21721500  |
| C | 4.21089700  | -2.28399400 | 4.36888000  |
| H | 6.07246900  | -2.21562400 | 3.27962900  |
| H | 2.23015100  | -2.20173500 | 5.21195400  |
| H | 4.64773100  | -2.77275700 | 5.23840100  |
| C | 3.51741000  | 1.20479900  | 0.40789500  |

|    |             |             |             |
|----|-------------|-------------|-------------|
| C  | 4.60646500  | 1.13379100  | -0.46862500 |
| C  | 3.28666400  | 2.39538400  | 1.10845500  |
| C  | 5.44956400  | 2.23026000  | -0.63611900 |
| H  | 4.80468200  | 0.22020900  | -1.02956100 |
| C  | 4.13393100  | 3.48607300  | 0.94616500  |
| H  | 2.42405900  | 2.47172200  | 1.77106100  |
| C  | 5.21567800  | 3.40660400  | 0.07125900  |
| H  | 6.29059400  | 2.16403900  | -1.32469800 |
| H  | 3.93881900  | 4.40582000  | 1.49460100  |
| H  | 5.87346500  | 4.26369200  | -0.06312000 |
| C  | -3.42662300 | -0.63836400 | 1.09962100  |
| C  | -3.08673800 | -0.81985400 | 2.44270900  |
| C  | -4.72164900 | -0.96839000 | 0.67410600  |
| C  | -4.02222600 | -1.32136600 | 3.34530400  |
| H  | -2.07609100 | -0.57749200 | 2.76895000  |
| C  | -5.65351700 | -1.47193700 | 1.57497300  |
| H  | -5.00592600 | -0.81654000 | -0.36827700 |
| C  | -5.30381900 | -1.64890500 | 2.91341300  |
| H  | -3.74553600 | -1.45727500 | 4.38950100  |
| H  | -6.65568700 | -1.72661800 | 1.23355500  |
| H  | -6.03367000 | -2.04318700 | 3.61849200  |
| C  | -3.04058800 | 1.45961600  | -0.83276600 |
| C  | -2.50968100 | 1.99259500  | -2.01497700 |
| C  | -4.12369400 | 2.10655600  | -0.22988200 |
| C  | -3.06425500 | 3.12685900  | -2.59436600 |
| H  | -1.63789700 | 1.51959400  | -2.47131800 |
| C  | -4.67727900 | 3.24613700  | -0.80914200 |
| H  | -4.53871200 | 1.72142000  | 0.70015000  |
| C  | -4.15366000 | 3.75589600  | -1.99322900 |
| H  | -2.63688800 | 3.52952400  | -3.51202000 |
| H  | -5.52024400 | 3.73860200  | -0.32711500 |
| H  | -4.58532500 | 4.64870900  | -2.44265500 |
| H  | -3.10212800 | -1.77040900 | -1.51340900 |
| H  | -2.03347200 | -0.67187600 | -2.39968300 |
| Ru | 0.05545000  | 0.17869000  | 0.52125900  |
| H  | -0.21429700 | -1.21561000 | 1.48293300  |
| C  | 1.44598600  | -2.21895200 | -0.90574500 |
| H  | 1.25701800  | -2.81390500 | -0.00246500 |
| H  | 1.58553600  | -2.91521300 | -1.74831200 |
| C  | -0.98307800 | -2.15756700 | -1.26654400 |
| H  | -0.90384400 | -2.84849300 | -2.12134700 |
| H  | -1.09317600 | -2.75359700 | -0.35150600 |
| C  | 0.48565100  | 1.83966800  | -0.75935300 |
| O  | 0.32434600  | 3.03141400  | -0.61609400 |

|   |             |             |             |
|---|-------------|-------------|-------------|
| H | 0.39525100  | -0.87760100 | -2.01006000 |
| O | 1.20711600  | 1.43904000  | -1.96609500 |
| C | 1.70083700  | 2.52691300  | -2.74884800 |
| H | 2.32690000  | 3.19358300  | -2.14560100 |
| H | 2.30050500  | 2.08613600  | -3.55258500 |
| H | 0.88398400  | 3.12408500  | -3.17915400 |
| C | -0.62710400 | 0.52589600  | -5.01480600 |
| H | 0.12192500  | 1.06742300  | -5.61492100 |
| H | -1.06011900 | -0.25785600 | -5.64481000 |
| H | -1.43460700 | 1.23106000  | -4.75438000 |
| O | -0.06250900 | -0.09962300 | -3.88664900 |
| H | 0.32687300  | 0.58883900  | -3.30820000 |

### TSB14

#### Coordinates (Angstroms)

|   | X           | Y           | Z           |
|---|-------------|-------------|-------------|
| N | 0.13154600  | -1.23549200 | -1.21713400 |
| C | 2.57173500  | -1.27267600 | -0.89949300 |
| H | 2.72748000  | -0.62490200 | -1.77297600 |
| H | 3.44735700  | -1.91594300 | -0.74555000 |
| C | -2.29233500 | -1.11438700 | -1.48203800 |
| C | -0.18963800 | 1.27349300  | 1.99859800  |
| O | -0.30437600 | 1.83330000  | 3.01585800  |
| P | -2.31812500 | 0.08599700  | -0.07676300 |
| P | 2.31189600  | -0.11972300 | 0.51369000  |
| C | 3.01230700  | -0.99207800 | 1.96651100  |
| C | 4.36279900  | -1.36985600 | 1.96945800  |
| C | 2.22577500  | -1.28709400 | 3.08392200  |
| C | 4.90953400  | -2.03557200 | 3.05987700  |
| H | 4.99623000  | -1.13059500 | 1.11439200  |
| C | 2.77587000  | -1.95188000 | 4.17840600  |
| H | 1.17554900  | -0.99909700 | 3.08996100  |
| C | 4.11524800  | -2.32843700 | 4.16790300  |
| H | 5.95918700  | -2.32364100 | 3.04739500  |
| H | 2.15245000  | -2.17590900 | 5.04224200  |
| H | 4.54445700  | -2.84743600 | 5.02337600  |
| C | 3.48129300  | 1.25041000  | 0.24663200  |
| C | 4.65526000  | 1.08680900  | -0.49721900 |
| C | 3.21191400  | 2.49359300  | 0.82840500  |
| C | 5.54587900  | 2.14600800  | -0.64728300 |
| H | 4.86788500  | 0.13308300  | -0.98075100 |
| C | 4.10053200  | 3.55288200  | 0.67233400  |
| H | 2.29250800  | 2.63746700  | 1.39758000  |
| C | 5.27097400  | 3.37985700  | -0.06201200 |

|    |             |             |             |
|----|-------------|-------------|-------------|
| H  | 6.45308700  | 2.00880600  | -1.23361600 |
| H  | 3.87431200  | 4.51754900  | 1.12316600  |
| H  | 5.96541600  | 4.20892200  | -0.18641800 |
| C  | -3.46478700 | -0.64662900 | 1.13824600  |
| C  | -3.06027900 | -0.90422200 | 2.45070000  |
| C  | -4.77596800 | -0.96594000 | 0.75330800  |
| C  | -3.94837600 | -1.47086100 | 3.36283600  |
| H  | -2.04125000 | -0.66669700 | 2.75303100  |
| C  | -5.65956100 | -1.53276400 | 1.66403200  |
| H  | -5.10866000 | -0.75726900 | -0.26431000 |
| C  | -5.24609200 | -1.78593200 | 2.97149800  |
| H  | -3.62200900 | -1.66664200 | 4.38264700  |
| H  | -6.67405000 | -1.77731100 | 1.35403500  |
| H  | -5.93890300 | -2.22887800 | 3.68474300  |
| C  | -3.20963500 | 1.52898000  | -0.74912800 |
| C  | -2.79242700 | 2.04994400  | -1.98341800 |
| C  | -4.21968100 | 2.18404500  | -0.03440700 |
| C  | -3.39669800 | 3.19240600  | -2.49628600 |
| H  | -1.98270800 | 1.57660200  | -2.54629800 |
| C  | -4.81656900 | 3.33014300  | -0.55417600 |
| H  | -4.54474700 | 1.79703000  | 0.93081900  |
| C  | -4.40965500 | 3.83399100  | -1.78638400 |
| H  | -3.06570100 | 3.58651700  | -3.45550900 |
| H  | -5.60305000 | 3.82950900  | 0.00920600  |
| H  | -4.87661800 | 4.73088900  | -2.19025400 |
| H  | -3.23367400 | -1.67486100 | -1.53564700 |
| H  | -2.18100600 | -0.53708600 | -2.40853900 |
| Ru | -0.01634800 | 0.28775200  | 0.42900600  |
| H  | -0.21778600 | -1.09877500 | 1.34574500  |
| C  | 1.31862700  | -2.10151100 | -1.08754800 |
| H  | 1.14673500  | -2.75834900 | -0.22260800 |
| H  | 1.41092600  | -2.74282900 | -1.97897000 |
| C  | -1.10188200 | -2.03714200 | -1.33135900 |
| H  | -1.02938800 | -2.71167800 | -2.20026900 |
| H  | -1.18508300 | -2.65898300 | -0.42930300 |
| C  | 0.23700400  | 1.97349500  | -0.67320700 |
| O  | 0.19981100  | 3.08662200  | -0.98952000 |
| H  | 0.18193800  | -0.66654600 | -2.08604800 |
| O  | 1.80555000  | 1.20939600  | -2.35425600 |
| C  | 2.36093100  | 2.32903200  | -2.93321700 |
| H  | 1.92437700  | 3.27793600  | -2.55200500 |
| H  | 3.45040600  | 2.39146800  | -2.74403600 |
| H  | 2.22835600  | 2.35505200  | -4.03669400 |
| C  | 0.13762100  | -0.21705800 | -4.61481400 |

|   |             |             |             |
|---|-------------|-------------|-------------|
| H | 1.10745800  | -0.75045900 | -4.52912000 |
| H | -0.62249600 | -0.97543500 | -4.87550600 |
| H | 0.22779600  | 0.45512800  | -5.49063300 |
| O | -0.21429000 | 0.45492300  | -3.45065400 |
| H | 0.74077200  | 0.89453800  | -2.98990300 |

**B18**

| -----                   |             |             |             |
|-------------------------|-------------|-------------|-------------|
| Coordinates (Angstroms) |             |             |             |
|                         | X           | Y           | Z           |
| -----                   |             |             |             |
| N                       | 0.14355600  | -1.21717000 | -1.21826700 |
| C                       | 2.58735300  | -1.25383400 | -0.89920300 |
| H                       | 2.77695300  | -0.60978300 | -1.76854700 |
| H                       | 3.45675200  | -1.90421000 | -0.73897500 |
| C                       | -2.27723200 | -1.12380800 | -1.49804800 |
| C                       | -0.18782900 | 1.29086600  | 1.99257500  |
| O                       | -0.30109600 | 1.85246200  | 3.00738400  |
| P                       | -2.31912100 | 0.06698900  | -0.08830300 |
| P                       | 2.31426200  | -0.12216700 | 0.52739400  |
| C                       | 2.98293200  | -1.00726600 | 1.98540300  |
| C                       | 4.30558000  | -1.47199300 | 1.97356700  |
| C                       | 2.20302200  | -1.21208500 | 3.12676600  |
| C                       | 4.83052600  | -2.13776900 | 3.07508800  |
| H                       | 4.93373900  | -1.30466600 | 1.09776400  |
| C                       | 2.73230400  | -1.87355800 | 4.23319100  |
| H                       | 1.17329400  | -0.85853400 | 3.14124000  |
| C                       | 4.04329000  | -2.33943700 | 4.20818100  |
| H                       | 5.85771900  | -2.49726000 | 3.05101700  |
| H                       | 2.11451200  | -2.02569300 | 5.11641300  |
| H                       | 4.45525600  | -2.85823700 | 5.07198900  |
| C                       | 3.48998000  | 1.24952300  | 0.29113800  |
| C                       | 4.67541900  | 1.08650500  | -0.43508300 |
| C                       | 3.20462400  | 2.49512000  | 0.85939900  |
| C                       | 5.56159100  | 2.14950700  | -0.58050900 |
| H                       | 4.90036400  | 0.13124400  | -0.90895500 |
| C                       | 4.09036300  | 3.55838800  | 0.70983900  |
| H                       | 2.27531400  | 2.63690600  | 1.41277300  |
| C                       | 5.27076500  | 3.38661800  | -0.00864900 |
| H                       | 6.47745300  | 2.01341200  | -1.15322100 |
| H                       | 3.85285300  | 4.52470800  | 1.15075800  |
| H                       | 5.96154100  | 4.21906500  | -0.13018000 |
| C                       | -3.45163100 | -0.67326400 | 1.13450900  |
| C                       | -3.04382200 | -0.91421400 | 2.44908400  |
| C                       | -4.75778500 | -1.01417700 | 0.75121900  |
| C                       | -3.92298600 | -1.48872400 | 3.36502000  |



|    |             |             |             |
|----|-------------|-------------|-------------|
| H  | -2.02895500 | -0.65893300 | 2.75020700  |
| C  | -5.63220400 | -1.59012000 | 1.66549200  |
| H  | -5.09361600 | -0.81492800 | -0.26713100 |
| C  | -5.21481300 | -1.82845200 | 2.97468300  |
| H  | -3.59427600 | -1.67134700 | 4.38641900  |
| H  | -6.64262100 | -1.85213100 | 1.35688900  |
| H  | -5.90028400 | -2.27867000 | 3.69049100  |
| C  | -3.21699400 | 1.50880900  | -0.75098300 |
| C  | -2.80035600 | 2.03631900  | -1.98364500 |
| C  | -4.23893100 | 2.14426600  | -0.03564800 |
| C  | -3.42680200 | 3.16892100  | -2.49464100 |
| H  | -1.96969200 | 1.57547100  | -2.53495300 |
| C  | -4.85431900 | 3.28065700  | -0.55484200 |
| H  | -4.56047900 | 1.75014400  | 0.92770200  |
| C  | -4.45360000 | 3.79122800  | -1.78669100 |
| H  | -3.10213300 | 3.57103500  | -3.45291000 |
| H  | -5.65011000 | 3.76619400  | 0.00756600  |
| H  | -4.93688700 | 4.67883000  | -2.19183500 |
| H  | -3.21438700 | -1.68967100 | -1.56384700 |
| H  | -2.15307500 | -0.52819300 | -2.41105700 |
| Ru | -0.01315200 | 0.29260100  | 0.41793000  |
| H  | -0.20603100 | -1.08444100 | 1.35026500  |
| C  | 1.33384500  | -2.07726000 | -1.11330700 |
| H  | 1.17261700  | -2.76710300 | -0.27109100 |
| H  | 1.43160400  | -2.68862900 | -2.02492800 |
| C  | -1.07767400 | -2.03258900 | -1.34276800 |
| H  | -0.98951700 | -2.69506300 | -2.21970200 |
| H  | -1.16498100 | -2.66825300 | -0.44971500 |
| C  | 0.18676900  | 1.92958400  | -0.70093000 |
| O  | 0.22512100  | 2.98128900  | -1.17498200 |
| H  | 0.16151200  | -0.58481300 | -2.08180200 |
| O  | 2.23062300  | 1.22196000  | -2.64811600 |
| C  | 2.63321500  | 2.44510300  | -3.18356900 |
| H  | 2.09281500  | 3.30632000  | -2.75021300 |
| H  | 3.70198900  | 2.58830500  | -2.97027500 |
| H  | 2.50297600  | 2.49332300  | -4.28075000 |
| C  | -0.15190700 | -0.17114500 | -4.43057100 |
| H  | 0.71543400  | -0.87290500 | -4.52632800 |
| H  | -1.05589300 | -0.80211800 | -4.61392800 |
| H  | -0.08028400 | 0.49567200  | -5.32029600 |
| O  | -0.19290500 | 0.50937900  | -3.24117100 |
| H  | 1.27406900  | 1.03279900  | -2.94356800 |

-----  
**TSB15**

| -----                   |             |             |             |
|-------------------------|-------------|-------------|-------------|
| Coordinates (Angstroms) |             |             |             |
|                         | X           | Y           | Z           |
| -----                   |             |             |             |
| N                       | 0.10431600  | -1.22583400 | -1.17545000 |
| C                       | 2.54215000  | -1.21888300 | -0.91854300 |
| H                       | 2.67314300  | -0.54640800 | -1.77988900 |
| H                       | 3.44355700  | -1.83790000 | -0.82270500 |
| C                       | -2.32231500 | -1.18943300 | -1.40940700 |
| C                       | -0.19339200 | 1.27226600  | 2.03887700  |
| O                       | -0.29521100 | 1.82800300  | 3.05794700  |
| P                       | -2.33986100 | 0.04686200  | -0.03961400 |
| P                       | 2.29079700  | -0.14992100 | 0.55311100  |
| C                       | 3.00908800  | -1.05665300 | 1.97002800  |
| C                       | 4.37388800  | -1.37874100 | 1.96503100  |
| C                       | 2.22577600  | -1.42794200 | 3.06583900  |
| C                       | 4.93778600  | -2.07000400 | 3.03059400  |
| H                       | 5.00166600  | -1.07826200 | 1.12482200  |
| C                       | 2.79440900  | -2.11695100 | 4.13541400  |
| H                       | 1.16536300  | -1.17929200 | 3.07225700  |
| C                       | 4.14771500  | -2.43998500 | 4.11861300  |
| H                       | 5.99777300  | -2.31716300 | 3.01504300  |
| H                       | 2.17540600  | -2.39990900 | 4.98496500  |
| H                       | 4.59180400  | -2.97736600 | 4.95483000  |
| C                       | 3.42220000  | 1.26254500  | 0.33671500  |
| C                       | 4.49369500  | 1.23473600  | -0.56376100 |
| C                       | 3.19988600  | 2.41812800  | 1.09665200  |
| C                       | 5.32827800  | 2.34206500  | -0.69336200 |
| H                       | 4.66867800  | 0.35820900  | -1.18545400 |
| C                       | 4.03564000  | 3.52137000  | 0.96556800  |
| H                       | 2.35768000  | 2.45603900  | 1.78882200  |
| C                       | 5.10199800  | 3.48464500  | 0.06926700  |
| H                       | 6.15260800  | 2.31292700  | -1.40414100 |
| H                       | 3.84755300  | 4.41471400  | 1.55824300  |
| H                       | 5.75209600  | 4.35090400  | -0.04029700 |
| C                       | -3.49207200 | -0.62662200 | 1.20244200  |
| C                       | -3.09001800 | -0.83939700 | 2.52350100  |
| C                       | -4.80805600 | -0.94205100 | 0.83043600  |
| C                       | -3.98541600 | -1.35653000 | 3.45752300  |
| H                       | -2.06681400 | -0.60762100 | 2.81575400  |
| C                       | -5.69936000 | -1.45846300 | 1.76338500  |
| H                       | -5.13820300 | -0.76929900 | -0.19462800 |
| C                       | -5.28852100 | -1.66596500 | 3.07954400  |
| H                       | -3.66046500 | -1.51786200 | 4.48380400  |
| H                       | -6.71773700 | -1.69949300 | 1.46375100  |
| H                       | -5.98718800 | -2.07036200 | 3.80976700  |

|    |             |             |             |
|----|-------------|-------------|-------------|
| C  | -3.20138200 | 1.48819900  | -0.75542000 |
| C  | -2.72239600 | 1.99306800  | -1.97450300 |
| C  | -4.24932400 | 2.14587800  | -0.10225100 |
| C  | -3.30686600 | 3.12369000  | -2.53462000 |
| H  | -1.87316100 | 1.51335900  | -2.47521400 |
| C  | -4.82705900 | 3.27916400  | -0.67002100 |
| H  | -4.61919700 | 1.77318700  | 0.85200300  |
| C  | -4.36074100 | 3.76705900  | -1.88754900 |
| H  | -2.93003900 | 3.50768900  | -3.48107400 |
| H  | -5.64376400 | 3.78207600  | -0.15493200 |
| H  | -4.81337200 | 4.65352200  | -2.32917600 |
| H  | -3.24792200 | -1.77766400 | -1.41813600 |
| H  | -2.26812200 | -0.62797200 | -2.34991700 |
| Ru | -0.03362400 | 0.26226400  | 0.45809200  |
| H  | -0.25129600 | -1.10653000 | 1.39934600  |
| C  | 1.29901200  | -2.06883900 | -1.09310900 |
| H  | 1.19544000  | -2.77469200 | -0.24936600 |
| H  | 1.38912700  | -2.67841500 | -2.00882600 |
| C  | -1.09371400 | -2.06374100 | -1.26525300 |
| H  | -1.01351500 | -2.73493800 | -2.13889700 |
| H  | -1.17350000 | -2.70398400 | -0.37004500 |
| C  | 0.22973200  | 1.86022900  | -0.68309900 |
| O  | 0.38244200  | 2.86837300  | -1.22672600 |
| H  | 0.09860000  | -0.47546500 | -2.15754000 |
| O  | 2.56622800  | 1.05976400  | -3.25027300 |
| C  | 2.79653900  | 2.43384100  | -3.36602200 |
| H  | 2.11081800  | 2.91632400  | -4.08535600 |
| H  | 2.70719000  | 2.97870700  | -2.40915700 |
| H  | 3.82092200  | 2.58426600  | -3.73540200 |
| C  | -0.15147700 | -0.31282600 | -4.29589200 |
| H  | 0.52187000  | -1.19429300 | -4.37707800 |
| H  | -1.18266000 | -0.69373200 | -4.46271000 |
| H  | 0.08416600  | 0.33057700  | -5.16344900 |
| O  | -0.01371900 | 0.37810300  | -3.10210000 |
| H  | 1.58094800  | 0.91149800  | -3.17023400 |

**B19**

| -----                   |             |             |             |
|-------------------------|-------------|-------------|-------------|
| Coordinates (Angstroms) |             |             |             |
|                         | X           | Y           | Z           |
| -----                   |             |             |             |
| N                       | 0.23207300  | -0.78900000 | -1.02329500 |
| C                       | 2.62660500  | -0.55398700 | -0.60359200 |
| H                       | 2.71313400  | 0.17466700  | -1.42194500 |
| H                       | 3.59199700  | -1.06645000 | -0.50490800 |
| C                       | -2.16326200 | -0.99379400 | -1.40325400 |

|   |             |             |             |
|---|-------------|-------------|-------------|
| C | -0.45185100 | 1.55557400  | 2.24556800  |
| O | -0.61505000 | 2.04640600  | 3.28982700  |
| P | -2.38071200 | 0.21550300  | -0.02297900 |
| P | 2.17928700  | 0.34393800  | 0.93650400  |
| C | 2.81924300  | -0.69666400 | 2.29361300  |
| C | 4.18555600  | -1.01368500 | 2.32354500  |
| C | 1.98650100  | -1.17626300 | 3.30714400  |
| C | 4.70166300  | -1.80870300 | 3.33961200  |
| H | 4.84979400  | -0.62787200 | 1.54919700  |
| C | 2.50701400  | -1.96936400 | 4.32798500  |
| H | 0.92567100  | -0.93027600 | 3.28528400  |
| C | 3.86114800  | -2.28938400 | 4.34331100  |
| H | 5.76226500  | -2.05347900 | 3.34989700  |
| H | 1.84874100  | -2.33937600 | 5.11214600  |
| H | 4.26543600  | -2.91288800 | 5.13913100  |
| C | 3.21313600  | 1.84165500  | 1.03500700  |
| C | 3.50976300  | 2.57628300  | -0.12052100 |
| C | 3.61286200  | 2.33696800  | 2.28341800  |
| C | 4.20868600  | 3.77641200  | -0.02231000 |
| H | 3.19758300  | 2.21947700  | -1.10417700 |
| C | 4.30650400  | 3.53986400  | 2.37335500  |
| H | 3.38275100  | 1.77749200  | 3.19021600  |
| C | 4.60814900  | 4.26133100  | 1.22071100  |
| H | 4.44123200  | 4.33538700  | -0.92778500 |
| H | 4.61359400  | 3.91305900  | 3.34897100  |
| H | 5.15174300  | 5.20201100  | 1.29209900  |
| C | -3.54958500 | -0.57605900 | 1.13141900  |
| C | -3.22311200 | -0.76215100 | 2.47727500  |
| C | -4.79831500 | -1.01346000 | 0.66535800  |
| C | -4.12706600 | -1.37533700 | 3.34238100  |
| H | -2.25156400 | -0.43323400 | 2.84339100  |
| C | -5.69802000 | -1.62698500 | 1.52926100  |
| H | -5.07008400 | -0.86046300 | -0.37992300 |
| C | -5.36207300 | -1.80911400 | 2.87032100  |
| H | -3.86167300 | -1.51554000 | 4.38877900  |
| H | -6.66322000 | -1.96457400 | 1.15587300  |
| H | -6.06645900 | -2.28922100 | 3.54746200  |
| C | -3.32302000 | 1.59201100  | -0.76817400 |
| C | -2.82052300 | 2.15960100  | -1.94885600 |
| C | -4.45427500 | 2.15663800  | -0.16858200 |
| C | -3.45449900 | 3.25329100  | -2.52641300 |
| H | -1.91653000 | 1.75834900  | -2.41494000 |
| C | -5.08186300 | 3.25658900  | -0.74991700 |
| H | -4.84962000 | 1.73593500  | 0.75535200  |

|    |             |             |             |
|----|-------------|-------------|-------------|
| C  | -4.58740000 | 3.80401100  | -1.93036200 |
| H  | -3.05552300 | 3.68124800  | -3.44454400 |
| H  | -5.96202000 | 3.68624100  | -0.27406300 |
| H  | -5.08055000 | 4.66296200  | -2.38245900 |
| H  | -3.02476300 | -1.66952300 | -1.47236300 |
| H  | -2.11560100 | -0.41592000 | -2.33518000 |
| Ru | -0.14280800 | 0.61589400  | 0.63345800  |
| H  | -0.34289600 | -0.80143300 | 1.50627300  |
| C  | 1.48350600  | -1.51507400 | -0.87789000 |
| H  | 1.42674400  | -2.26352900 | -0.05807800 |
| H  | 1.69862000  | -2.08879100 | -1.79948800 |
| C  | -0.85859100 | -1.73619200 | -1.18455900 |
| H  | -0.66292700 | -2.39032000 | -2.05672800 |
| H  | -0.95155600 | -2.40924700 | -0.30681600 |
| C  | 0.07656500  | 2.26914600  | -0.42257800 |
| O  | 0.17869400  | 3.30292100  | -0.93486500 |
| H  | 0.18498100  | 0.20181600  | -2.31819300 |
| O  | 0.11526900  | 0.82521900  | -3.14115800 |
| C  | 0.15383700  | -0.00065500 | -4.28084900 |
| H  | 0.24800300  | 0.63481200  | -5.17024200 |
| H  | 1.01256300  | -0.69357400 | -4.27170600 |
| H  | -0.76548000 | -0.60043200 | -4.39358700 |
| C  | 2.70414600  | 3.10210200  | -3.67820300 |
| H  | 3.75531600  | 3.39115200  | -3.80165400 |
| H  | 2.20755800  | 3.22710700  | -4.65635900 |
| H  | 2.23860100  | 3.81477100  | -2.97541400 |
| O  | 2.67289200  | 1.77420100  | -3.22653000 |
| H  | 1.72338100  | 1.50808500  | -3.16679100 |

-----  
 CH<sub>3</sub>OH

-----  
 Coordinates (Angstroms)

|   | X          | Y           | Z           |
|---|------------|-------------|-------------|
| C | 2.83870800 | -0.02091200 | -0.01656600 |
| H | 3.21012100 | -1.05052200 | -0.02880400 |
| H | 3.19462000 | 0.45525000  | 0.91226700  |
| H | 1.73715700 | -0.06000600 | 0.01938900  |
| O | 3.32832100 | 0.60510400  | -1.17847300 |
| H | 3.00044200 | 1.51447600  | -1.17064400 |

-----  
 HCHO

-----  
 Coordinates (Angstroms)

|   | X           | Y          | Z          |
|---|-------------|------------|------------|
| C | -2.82869200 | 0.45762700 | 0.00001000 |

|   |             |             |             |
|---|-------------|-------------|-------------|
| O | -1.62433400 | 0.45762700  | -0.00000300 |
| H | -3.42993900 | 1.39659700  | -0.00000300 |
| H | -3.42993900 | -0.48134300 | 0.00003600  |

H<sub>2</sub>

Coordinates (Angstroms)

|   | X           | Y          | Z          |
|---|-------------|------------|------------|
| H | -3.29950100 | 0.35849100 | 0.00000000 |
| H | -4.04389500 | 0.35849100 | 0.00000000 |

CO

Coordinates (Angstroms)

|   | X           | Y           | Z          |
|---|-------------|-------------|------------|
| O | -3.25691800 | -0.11320800 | 0.00000000 |
| C | -4.39770900 | -0.11320800 | 0.00000000 |

1

Coordinates (Angstroms)

|   | X           | Y           | Z           |
|---|-------------|-------------|-------------|
| C | -0.67502800 | 0.81998600  | 0.26288100  |
| H | -0.32910700 | 1.37524300  | 1.15123700  |
| H | -1.78388500 | 0.89601600  | 0.21971600  |
| O | -0.13260700 | 1.36142900  | -0.91576500 |
| C | -0.65677300 | 2.63633400  | -1.18118100 |
| H | -0.42347500 | 3.35675800  | -0.37850100 |
| H | -0.20157500 | 2.98950700  | -2.11055900 |
| H | -1.75369900 | 2.61318800  | -1.30920200 |
| O | -0.23735700 | -0.47855100 | 0.41801300  |
| H | -0.56161700 | -0.97949600 | -0.34615400 |

2

Coordinates (Angstroms)

|   | X           | Y           | Z           |
|---|-------------|-------------|-------------|
| C | -2.81591700 | 0.47156500  | -0.00003900 |
| O | -1.61512900 | 0.52222700  | 0.00026900  |
| H | -3.40101400 | -0.47415800 | -0.00038500 |
| O | -3.58728000 | 1.56869400  | -0.00000600 |
| C | -4.99782700 | 1.32324300  | -0.00024200 |
| H | -5.30260600 | 0.77230700  | 0.89707500  |
| H | -5.47535300 | 2.30374900  | -0.00042300 |
| H | -5.30231800 | 0.77212600  | -0.89754800 |
